# Supplementary material
Source: publisher figshare collection journal article supplement (https://acs.figshare.com/ndownloader/files/4690942)
Supplement: Supplementary file 1 [file 4690942]

  
data_s1718n 
#------------------ SUBMISSION DETAILS --------------------------------------# 
  
# Name and address of author for correspondence 
  
_publ_contact_author_name      'Raftery, James' 
_publ_contact_author_address 
; 
Department of Chemistry 
University of Manchester 
Manchester M13 9PL 
England  UK 
; 
_publ_contact_author_email       'jrtest@spec.ch.man.ac.uk' 
_publ_contact_author_fax         '44(161)275-4734' 
_publ_contact_author_phone       '44(161)275-4700' 
  
_publ_requested_journal          'Acta Crystallographica Section C' 
_publ_requested_coeditor_name    ? 
_publ_contact_letter            # Include date of submission 
; 
Date of submission ? 
  
Please consider this CIF submission for publication as a 
Regular Structural Paper in Acta Crystallographica C. 
; 
_publ_requested_category        ? 
  
  
#------------------ TITLE AND AUTHOR LIST------------------------------------# 
  
_publ_section_title 
; 
 ? 
; 
  
_publ_section_title_footnote 
; 
? 
; 
  
loop_ 
_publ_author_name 
? 
First Author 
? 
_publ_author_address 
; 
Department of Chemistry 
University of Manchester 
Manchester M13 9PL 
England  UK 
; 
  
#------------------ TEXT ----------------------------------------------------# 
  
_publ_section_synopsis 
; 
# Insert blank lines between paragraphs 
? 
; 
_publ_section_abstract 
; 
# Insert blank lines between paragraphs 
 ? 
; 
  
_publ_section_comment 
; 
# Insert blank lines between paragraphs 
 ? 
; 
  
_publ_section_exptl_prep 
; 
 ? 
; 
  
_publ_section_exptl_refinement 
; 
The structure was solved by direct methods. 
The non-hydrogen atoms were refined anisotropically. 
H atoms were included in calculated positions. 
; 
  
# Insert blank lines between references 
  
_publ_section_references 
; 
# 
# Put all your general crystallographic references here 
# Delete as required from the document CIF 
# 
  
  
 Sheldrick, G.M. (1993) SHELXL93. Program for crystal structure 
   refinement. University of G\"ottingen, Germany. 
  
 Sheldrick, G.M. (1997) SHELXL97. Program for crystal structure 
   refinement. University of G\"ottingen, Germany. 
  
 Sheldrick, G.M. (1985). SHELXS86. In Crystallographic Computing 3, 
 edited by G. M. Sheldrick, C. Kruger & R. Goddard, pp. 175-189. 
 Oxford University Press. 
  
 Sheldrick, G.M. (1997) SHELXS97. Program for Crystal Structure solution. 
   University of G\"ottingen, Germany. 
  
  
 Wilson, A.J.C. (1992) Ed. International Tables for Crystallography, 
   Volume C, Kluwer Academic Publishers, Dordrecht, The Netherlands. 
; 
_publ_section_figure_captions 
; 
 Figure 1. View of (I) (50% probability displacement ellipsoids) 
; 
_publ_section_acknowledgements 
; 
 ? 
; 
_publ_section_table_legends 
; 
Table 1. Fractional atomic coordinates and equivalent 
         isotropic displacement parameters (\%A^2^) 
  
Table 2. Selected geometric parameters (\%A ,\% ) 
; 
#------------------  SECTION 2. COMPOUND(S) DETAILS -------------------------# 
  
_audit_creation_method            SHELXL-97 
_chemical_name_systematic 
; 
 ? 
; 
_chemical_name_common             ? 
_chemical_melting_point           ? 
_chemical_formula_moiety          ? 
_chemical_formula_sum 
 'C102 H192 Mn22 N4 O78' 
_chemical_formula_weight          3931.28 
  
loop_ 
 _atom_type_symbol 
 _atom_type_description 
 _atom_type_scat_dispersion_real 
 _atom_type_scat_dispersion_imag 
 _atom_type_scat_source 
 'C'  'C'   0.0033   0.0016 
 'International Tables Vol C Tables 4.2.6.8 and 6.1.1.4' 
 'H'  'H'   0.0000   0.0000 
 'International Tables Vol C Tables 4.2.6.8 and 6.1.1.4' 
 'N'  'N'   0.0061   0.0033 
 'International Tables Vol C Tables 4.2.6.8 and 6.1.1.4' 
 'O'  'O'   0.0106   0.0060 
 'International Tables Vol C Tables 4.2.6.8 and 6.1.1.4' 
 'Mn'  'Mn'   0.3368   0.7283 
 'International Tables Vol C Tables 4.2.6.8 and 6.1.1.4' 
  
_symmetry_cell_setting            Orthorhombic 
_symmetry_space_group_name_H-M    Pbca 
  
loop_ 
 _symmetry_equiv_pos_as_xyz 
 'x, y, z' 
 '-x+1/2, -y, z+1/2' 
 '-x, y+1/2, -z+1/2' 
 'x+1/2, -y+1/2, -z' 
 '-x, -y, -z' 
 'x-1/2, y, -z-1/2' 
 'x, -y-1/2, z-1/2' 
 '-x-1/2, y-1/2, z' 
  
_cell_length_a                    25.229(13) 
_cell_length_b                    20.655(10) 
_cell_length_c                    33.560(16) 
_cell_angle_alpha                 90.00 
_cell_angle_beta                  90.00 
_cell_angle_gamma                 90.00 
_cell_volume                      17488(15) 
_cell_formula_units_Z             4 
_cell_measurement_temperature     100(2) 
_cell_measurement_reflns_used 4381 
_cell_measurement_theta_min 2.212 
_cell_measurement_theta_max 18.0795 
  
_exptl_crystal_description        plate 
_exptl_crystal_colour             black 
_exptl_crystal_size_max           0.45 
_exptl_crystal_size_mid           0.30 
_exptl_crystal_size_min           0.06 
_exptl_crystal_density_meas       0 
_exptl_crystal_density_diffrn     1.493 
_exptl_crystal_density_method     'not measured' 
_exptl_crystal_F_000              8024 
_exptl_absorpt_coefficient_mu     1.609 
_exptl_absorpt_correction_type    none 
_exptl_absorpt_correction_T_min   0.5313 
_exptl_absorpt_correction_T_max   0.9096 
_exptl_absorpt_process_details    ? 
  
_exptl_special_details 
; 
 ? 
; 
  
_diffrn_ambient_temperature       100(2) 
_diffrn_radiation_wavelength      0.71073 
_diffrn_radiation_type            MoK\a 
_diffrn_radiation_source          'fine-focus sealed tube' 
_diffrn_radiation_monochromator   graphite 
_diffrn_measurement_device_type   'CCD area detector' 
_diffrn_measurement_method        'phi and omega scans' 
_diffrn_detector_area_resol_mean  ? 
_diffrn_standards_number          ? 
_diffrn_standards_interval_count  ? 
_diffrn_standards_interval_time   ? 
_diffrn_standards_decay_%         ? 
_diffrn_reflns_number             106948 
_diffrn_reflns_av_R_equivalents   0.2219 
_diffrn_reflns_av_sigmaI/netI     0.3104 
_diffrn_reflns_limit_h_min        -24 
_diffrn_reflns_limit_h_max        33 
_diffrn_reflns_limit_k_min        -27 
_diffrn_reflns_limit_k_max        27 
_diffrn_reflns_limit_l_min        -43 
_diffrn_reflns_limit_l_max        39 
_diffrn_reflns_theta_min          1.21 
_diffrn_reflns_theta_max          28.78 
_reflns_number_total              21304 
_reflns_number_gt                 6295 
_reflns_threshold_expression      >2sigma(I) 
  
_computing_data_collection        'Bruker SMART' 
_computing_cell_refinement        'Bruker SMART' 
_computing_data_reduction         'Bruker SAINT' 
_computing_structure_solution     'SHELXS-97 (Sheldrick, 1990)' 
_computing_structure_refinement   'SHELXL-97 (Sheldrick, 1997)' 
_computing_molecular_graphics     'Bruker SHELXTL' 
_computing_publication_material   'Bruker SHELXTL' 
  
_refine_special_details 
; 
 Refinement of F^2^ against ALL reflections.  The weighted R-factor wR and 
 goodness of fit S are based on F^2^, conventional R-factors R are based 
 on F, with F set to zero for negative F^2^. The threshold expression of 
 F^2^ > 2sigma(F^2^) is used only for calculating R-factors(gt) etc. and is 
 not relevant to the choice of reflections for refinement.  R-factors based 
 on F^2^ are statistically about twice as large as those based on F, and R- 
 factors based on ALL data will be even larger. 
; 
  
_refine_ls_structure_factor_coef  Fsqd 
_refine_ls_matrix_type            full 
_refine_ls_weighting_scheme       calc 
_refine_ls_weighting_details 
 'calc w=1/[\s^2^(Fo^2^)+(0.0991P)^2^+0.0000P] where P=(Fo^2^+2Fc^2^)/3' 
_atom_sites_solution_primary      direct 
_atom_sites_solution_secondary    difmap 
_atom_sites_solution_hydrogens    geom 
_refine_ls_hydrogen_treatment     mixed 
_refine_ls_extinction_method      none 
_refine_ls_extinction_coef        ? 
_refine_ls_number_reflns          21304 
_refine_ls_number_parameters      949 
_refine_ls_number_restraints      0 
_refine_ls_R_factor_all           0.2461 
_refine_ls_R_factor_gt            0.0819 
_refine_ls_wR_factor_ref          0.2747 
_refine_ls_wR_factor_gt           0.2312 
_refine_ls_goodness_of_fit_ref    0.947 
_refine_ls_restrained_S_all       0.947 
_refine_ls_shift/su_max           0.026 
_refine_ls_shift/su_mean          0.000 
  
loop_ 
 _atom_site_label 
 _atom_site_type_symbol 
 _atom_site_fract_x 
 _atom_site_fract_y 
 _atom_site_fract_z 
 _atom_site_U_iso_or_equiv 
 _atom_site_adp_type 
 _atom_site_occupancy 
 _atom_site_symmetry_multiplicity 
 _atom_site_calc_flag 
 _atom_site_refinement_flags 
 _atom_site_disorder_assembly 
 _atom_site_disorder_group 
C1 C 0.5897(6) 0.8308(7) 0.2085(5) 0.087(6) Uani 1 1 d . . . 
H1A H 0.5643 0.8158 0.2286 0.130 Uiso 1 1 calc R . . 
H1B H 0.6008 0.8751 0.2147 0.130 Uiso 1 1 calc R . . 
H1C H 0.6207 0.8023 0.2084 0.130 Uiso 1 1 calc R . . 
C2 C 0.5645(6) 0.8295(6) 0.1691(4) 0.063(4) Uani 1 1 d . . . 
H2A H 0.5885 0.8511 0.1498 0.075 Uiso 1 1 calc R . . 
H2B H 0.5315 0.8552 0.1703 0.075 Uiso 1 1 calc R . . 
C3 C 0.5513(5) 0.7633(6) 0.1534(4) 0.048(3) Uani 1 1 d . . . 
C4 C 0.5250(5) 0.7741(5) 0.1132(4) 0.052(4) Uani 1 1 d . . . 
H4A H 0.4926 0.8003 0.1173 0.062 Uiso 1 1 calc R . . 
H4B H 0.5493 0.7998 0.0963 0.062 Uiso 1 1 calc R . . 
C5 C 0.5121(5) 0.7293(5) 0.1828(4) 0.044(3) Uani 1 1 d . . . 
H5A H 0.5295 0.7240 0.2090 0.052 Uiso 1 1 calc R . . 
H5B H 0.4805 0.7570 0.1865 0.052 Uiso 1 1 calc R . . 
C6 C 0.6014(5) 0.7241(5) 0.1487(4) 0.046(3) Uani 1 1 d . . . 
H6A H 0.6265 0.7485 0.1316 0.055 Uiso 1 1 calc R . . 
H6B H 0.6181 0.7188 0.1752 0.055 Uiso 1 1 calc R . . 
C7 C 0.5940(8) 0.0822(8) 0.2133(5) 0.124(8) Uani 1 1 d . . . 
H7A H 0.6106 0.0829 0.1869 0.186 Uiso 1 1 calc R . . 
H7B H 0.5706 0.0444 0.2154 0.186 Uiso 1 1 calc R . . 
H7C H 0.6216 0.0796 0.2338 0.186 Uiso 1 1 calc R . . 
C8 C 0.5614(7) 0.1445(7) 0.2193(5) 0.082(5) Uani 1 1 d . . . 
H8A H 0.5304 0.1427 0.2012 0.098 Uiso 1 1 calc R . . 
H8B H 0.5476 0.1445 0.2469 0.098 Uiso 1 1 calc R . . 
C9 C 0.5900(7) 0.2087(7) 0.2122(4) 0.068(5) Uani 1 1 d . . . 
C10 C 0.6215(6) 0.2070(6) 0.1713(4) 0.063(4) Uani 1 1 d . . . 
H10A H 0.6523 0.1777 0.1739 0.075 Uiso 1 1 calc R . . 
H10B H 0.5981 0.1895 0.1502 0.075 Uiso 1 1 calc R . . 
C11 C 0.5475(6) 0.2625(6) 0.2112(5) 0.073(5) Uani 1 1 d . . . 
H11A H 0.5252 0.2568 0.1872 0.087 Uiso 1 1 calc R . . 
H11B H 0.5243 0.2582 0.2348 0.087 Uiso 1 1 calc R . . 
C12 C 0.6316(6) 0.2268(6) 0.2462(4) 0.067(4) Uani 1 1 d . . . 
H12A H 0.6119 0.2362 0.2711 0.081 Uiso 1 1 calc R . . 
H12B H 0.6543 0.1886 0.2513 0.081 Uiso 1 1 calc R . . 
C13 C 0.7969(6) 0.3891(7) 0.2967(4) 0.072(5) Uani 1 1 d . . . 
H13A H 0.7659 0.3817 0.3137 0.107 Uiso 1 1 calc R . . 
H13B H 0.8273 0.4009 0.3133 0.107 Uiso 1 1 calc R . . 
H13C H 0.8050 0.3495 0.2818 0.107 Uiso 1 1 calc R . . 
C14 C 0.7848(5) 0.4445(6) 0.2673(3) 0.047(3) Uani 1 1 d . . . 
H14A H 0.7756 0.4836 0.2829 0.057 Uiso 1 1 calc R . . 
H14B H 0.8177 0.4544 0.2524 0.057 Uiso 1 1 calc R . . 
C15 C 0.7406(5) 0.4327(6) 0.2371(3) 0.041(3) Uani 1 1 d . . . 
C16 C 0.7533(5) 0.3718(6) 0.2127(3) 0.046(3) Uani 1 1 d . . . 
H16A H 0.7890 0.3767 0.2010 0.055 Uiso 1 1 calc R . . 
H16B H 0.7543 0.3342 0.2310 0.055 Uiso 1 1 calc R . . 
C17 C 0.6879(5) 0.4208(5) 0.2579(3) 0.044(3) Uani 1 1 d . . . 
H17A H 0.6912 0.3813 0.2745 0.053 Uiso 1 1 calc R . . 
H17B H 0.6807 0.4576 0.2760 0.053 Uiso 1 1 calc R . . 
C18 C 0.7364(5) 0.4923(6) 0.2130(3) 0.044(3) Uani 1 1 d . . . 
H18A H 0.7275 0.5287 0.2310 0.053 Uiso 1 1 calc R . . 
H18B H 0.7716 0.5016 0.2012 0.053 Uiso 1 1 calc R . . 
C19 C 0.7507(6) 0.4659(7) -0.1222(4) 0.055(4) Uani 1 1 d . . . 
C20 C 0.7996(6) 0.4681(7) -0.1483(4) 0.070(4) Uani 1 1 d . . . 
H20A H 0.8243 0.4341 -0.1400 0.106 Uiso 1 1 calc R . . 
H20B H 0.8167 0.5104 -0.1456 0.106 Uiso 1 1 calc R . . 
H20C H 0.7894 0.4611 -0.1761 0.106 Uiso 1 1 calc R . . 
C21 C 0.8732(7) 0.6109(8) -0.0502(5) 0.104(6) Uani 1 1 d . . . 
H21A H 0.8802 0.5647 -0.0542 0.156 Uiso 1 1 calc R . . 
H21B H 0.9065 0.6351 -0.0522 0.156 Uiso 1 1 calc R . . 
H21C H 0.8485 0.6263 -0.0707 0.156 Uiso 1 1 calc R . . 
C22 C 0.8479(5) 0.6218(6) -0.0073(4) 0.059(4) Uani 1 1 d . . . 
H22A H 0.8727 0.6056 0.0132 0.071 Uiso 1 1 calc R . . 
H22B H 0.8428 0.6687 -0.0028 0.071 Uiso 1 1 calc R . . 
C23 C 0.7933(5) 0.5862(6) -0.0028(3) 0.043(3) Uani 1 1 d . . . 
C24 C 0.7535(4) 0.6149(5) -0.0304(3) 0.039(3) Uani 1 1 d . . . 
H24A H 0.7502 0.6617 -0.0246 0.046 Uiso 1 1 calc R . . 
H24B H 0.7667 0.6105 -0.0581 0.046 Uiso 1 1 calc R . . 
C25 C 0.8017(5) 0.5138(5) -0.0090(4) 0.043(3) Uani 1 1 d . . . 
H25A H 0.8148 0.5063 -0.0365 0.052 Uiso 1 1 calc R . . 
H25B H 0.8291 0.4982 0.0097 0.052 Uiso 1 1 calc R . . 
C26 C 0.7772(5) 0.5982(6) 0.0420(3) 0.047(3) Uani 1 1 d . . . 
H26A H 0.8055 0.5809 0.0595 0.056 Uiso 1 1 calc R . . 
H26B H 0.7748 0.6454 0.0467 0.056 Uiso 1 1 calc R . . 
C27 C 0.8139(6) 0.4531(6) 0.1081(4) 0.046(3) Uani 1 1 d . . . 
C28 C 0.8721(5) 0.4733(8) 0.1155(4) 0.076(5) Uani 1 1 d . . . 
H28A H 0.8892 0.4831 0.0900 0.114 Uiso 1 1 calc R . . 
H28B H 0.8910 0.4377 0.1286 0.114 Uiso 1 1 calc R . . 
H28C H 0.8730 0.5117 0.1326 0.114 Uiso 1 1 calc R . . 
C29 C 0.6028(6) 0.6019(7) 0.2476(4) 0.056(4) Uani 1 1 d . . . 
C30 C 0.6032(8) 0.6350(8) 0.2884(4) 0.119(8) Uani 1 1 d . . . 
H30A H 0.5672 0.6490 0.2952 0.178 Uiso 1 1 calc R . . 
H30B H 0.6267 0.6727 0.2876 0.178 Uiso 1 1 calc R . . 
H30C H 0.6160 0.6045 0.3086 0.178 Uiso 1 1 calc R . . 
C31 C 0.5449(5) 0.6318(5) -0.0097(4) 0.040(3) Uani 1 1 d . . . 
C32 C 0.5085(5) 0.6322(6) -0.0441(3) 0.042(3) Uani 1 1 d . . . 
H32A H 0.4768 0.6575 -0.0375 0.063 Uiso 1 1 calc R . . 
H32B H 0.4981 0.5877 -0.0506 0.063 Uiso 1 1 calc R . . 
H32C H 0.5263 0.6517 -0.0671 0.063 Uiso 1 1 calc R . . 
C33 C 0.5057(5) 0.4844(6) 0.2031(4) 0.042(3) Uani 1 1 d . . . 
C34 C 0.4595(6) 0.4443(7) 0.2131(4) 0.079(5) Uani 1 1 d . . . 
H34A H 0.4446 0.4586 0.2386 0.118 Uiso 1 1 calc R . . 
H34B H 0.4704 0.3989 0.2152 0.118 Uiso 1 1 calc R . . 
H34C H 0.4326 0.4486 0.1922 0.118 Uiso 1 1 calc R . . 
C35 C 0.6976(5) 0.3395(6) 0.0658(4) 0.041(3) Uani 1 1 d . . . 
C36 C 0.6783(5) 0.2759(6) 0.0498(4) 0.062(4) Uani 1 1 d . . . 
H36A H 0.6448 0.2824 0.0356 0.093 Uiso 1 1 calc R . . 
H36B H 0.6728 0.2456 0.0719 0.093 Uiso 1 1 calc R . . 
H36C H 0.7047 0.2580 0.0315 0.093 Uiso 1 1 calc R . . 
C37 C 0.6524(5) 0.7390(6) 0.0376(4) 0.043(3) Uani 1 1 d . . . 
C38 C 0.6759(6) 0.8043(6) 0.0350(5) 0.074(5) Uani 1 1 d . . . 
H38A H 0.6507 0.8337 0.0221 0.111 Uiso 1 1 calc R . . 
H38B H 0.7086 0.8023 0.0194 0.111 Uiso 1 1 calc R . . 
H38C H 0.6839 0.8201 0.0619 0.111 Uiso 1 1 calc R . . 
C39 C 0.6401(6) 0.2630(7) -0.1348(3) 0.051(4) Uani 1 1 d . . . 
C40 C 0.6598(5) 0.1950(6) -0.1494(4) 0.065(4) Uani 1 1 d . . . 
H40A H 0.6746 0.1990 -0.1763 0.097 Uiso 1 1 calc R . . 
H40B H 0.6300 0.1647 -0.1498 0.097 Uiso 1 1 calc R . . 
H40C H 0.6872 0.1789 -0.1312 0.097 Uiso 1 1 calc R . . 
C41 C 0.4065(5) 0.6834(5) 0.0443(3) 0.046(3) Uani 1 1 d . . . 
H41A H 0.3946 0.7248 0.0554 0.070 Uiso 1 1 calc R . . 
H41B H 0.3806 0.6681 0.0247 0.070 Uiso 1 1 calc R . . 
H41C H 0.4410 0.6893 0.0313 0.070 Uiso 1 1 calc R . . 
C42 C 0.3797(5) 0.5888(6) 0.1827(3) 0.052(4) Uani 1 1 d . . . 
H42A H 0.3604 0.6288 0.1886 0.077 Uiso 1 1 calc R . . 
H42B H 0.4106 0.5854 0.2003 0.077 Uiso 1 1 calc R . . 
H42C H 0.3563 0.5515 0.1871 0.077 Uiso 1 1 calc R . . 
C43 C 0.7356(5) 0.3558(6) -0.0500(4) 0.052(4) Uani 1 1 d . . . 
H43A H 0.7220 0.3118 -0.0463 0.078 Uiso 1 1 calc R . . 
H43B H 0.7571 0.3681 -0.0269 0.078 Uiso 1 1 calc R . . 
H43C H 0.7574 0.3574 -0.0742 0.078 Uiso 1 1 calc R . . 
C44 C 0.6337(5) 0.5521(6) -0.1021(3) 0.045(3) Uani 1 1 d . . . 
H44A H 0.6200 0.5883 -0.0862 0.068 Uiso 1 1 calc R . . 
H44B H 0.6082 0.5411 -0.1230 0.068 Uiso 1 1 calc R . . 
H44C H 0.6675 0.5646 -0.1143 0.068 Uiso 1 1 calc R . . 
C45 C 0.4961(5) 0.5298(6) 0.0900(4) 0.058(4) Uani 1 1 d . . . 
H45A H 0.4735 0.5056 0.1085 0.087 Uiso 1 1 calc R . . 
H45B H 0.5288 0.5054 0.0851 0.087 Uiso 1 1 calc R . . 
H45C H 0.4772 0.5363 0.0648 0.087 Uiso 1 1 calc R . . 
C46 C 0.5869(5) 0.3880(5) 0.1266(3) 0.046(3) Uani 1 1 d . . . 
H46A H 0.5914 0.3447 0.1151 0.069 Uiso 1 1 calc R . . 
H46B H 0.5896 0.4206 0.1054 0.069 Uiso 1 1 calc R . . 
H46C H 0.5521 0.3911 0.1393 0.069 Uiso 1 1 calc R . . 
C47 C 0.6023(5) 0.4678(6) 0.0156(3) 0.045(3) Uani 1 1 d . . . 
H47A H 0.5791 0.4916 0.0340 0.068 Uiso 1 1 calc R . . 
H47B H 0.6083 0.4240 0.0260 0.068 Uiso 1 1 calc R . . 
H47C H 0.5853 0.4650 -0.0106 0.068 Uiso 1 1 calc R . . 
C48 C 0.7171(5) 0.6509(6) 0.1820(3) 0.049(4) Uani 1 1 d . . . 
H48 H 0.7056 0.6229 0.2027 0.059 Uiso 1 1 calc R . . 
C49 C 0.7422(6) 0.7075(6) 0.1875(4) 0.059(4) Uani 1 1 d . . . 
H49 H 0.7516 0.7267 0.2123 0.070 Uiso 1 1 calc R . . 
C50 C 0.7308(5) 0.6909(6) 0.1241(4) 0.046(3) Uani 1 1 d . . . 
H50 H 0.7303 0.6976 0.0961 0.055 Uiso 1 1 calc R . . 
C51 C 0.5595(6) 0.4337(7) 0.3088(4) 0.080(5) Uani 1 1 d . . . 
H51A H 0.5567 0.4289 0.3378 0.119 Uiso 1 1 calc R . . 
H51B H 0.5305 0.4609 0.2991 0.119 Uiso 1 1 calc R . . 
H51C H 0.5935 0.4539 0.3021 0.119 Uiso 1 1 calc R . . 
Mn1 Mn 0.65882(7) 0.59853(8) 0.01939(5) 0.0356(4) Uani 1 1 d . . . 
Mn2 Mn 0.72246(7) 0.47537(8) 0.05053(5) 0.0343(4) Uani 1 1 d . . . 
Mn3 Mn 0.55075(7) 0.59952(8) 0.16504(5) 0.0360(4) Uani 1 1 d . . . 
Mn4 Mn 0.70748(7) 0.42019(8) 0.13919(5) 0.0358(5) Uani 1 1 d . . . 
Mn5 Mn 0.62311(7) 0.48323(8) 0.19740(5) 0.0375(5) Uani 1 1 d . . . 
Mn6 Mn 0.69905(7) 0.49290(8) -0.04095(5) 0.0373(5) Uani 1 1 d . . . 
Mn7 Mn 0.45462(7) 0.65646(8) 0.12003(5) 0.0370(5) Uani 1 1 d . . . 
Mn8 Mn 0.56572(7) 0.65669(8) 0.07599(5) 0.0380(5) Uani 1 1 d . . . 
Mn9 Mn 0.65160(7) 0.40202(9) -0.10096(5) 0.0410(5) Uani 1 1 d . . . 
Mn10 Mn 0.66016(7) 0.56703(8) 0.11608(5) 0.0359(4) Uani 1 1 d . . . 
Mn11 Mn 0.64123(8) 0.33310(8) 0.19739(5) 0.0400(5) Uani 1 1 d . . . 
N1 N 0.7105(4) 0.6389(4) 0.1417(3) 0.042(3) Uani 1 1 d . . . 
N2 N 0.7516(4) 0.7324(5) 0.1494(3) 0.054(3) Uani 1 1 d . . . 
O1 O 0.5105(3) 0.7161(3) 0.0917(2) 0.041(2) Uani 1 1 d . . . 
O2 O 0.5928(3) 0.6611(4) 0.1314(2) 0.042(2) Uani 1 1 d . . . 
O3 O 0.4955(3) 0.6660(3) 0.1681(2) 0.039(2) Uani 1 1 d . . . 
O4 O 0.6388(3) 0.2675(4) 0.1603(2) 0.049(2) Uani 1 1 d . . . 
O5 O 0.5693(3) 0.3229(4) 0.2107(2) 0.052(2) Uani 1 1 d . . . 
O6 O 0.6635(4) 0.2789(4) 0.2375(2) 0.053(2) Uani 1 1 d . . . 
O7 O 0.7166(3) 0.3582(3) 0.1815(2) 0.0361(19) Uani 1 1 d . . . 
O8 O 0.6437(3) 0.4131(3) 0.2318(2) 0.039(2) Uani 1 1 d . . . 
O9 O 0.6980(3) 0.4903(3) 0.1815(2) 0.0384(19) Uani 1 1 d . . . 
O10 O 0.7127(3) 0.4318(4) -0.1333(2) 0.047(2) Uani 1 1 d . . . 
O11 O 0.7545(3) 0.4989(4) -0.0896(2) 0.047(2) Uani 1 1 d . . . 
O12 O 0.7039(3) 0.5868(3) -0.0280(2) 0.0372(19) Uani 1 1 d . . . 
O13 O 0.7540(3) 0.4778(3) -0.00308(19) 0.0341(18) Uani 1 1 d . . . 
O14 O 0.7280(3) 0.5689(3) 0.0527(2) 0.0373(19) Uani 1 1 d . . . 
O15 O 0.7994(3) 0.4566(4) 0.0734(2) 0.044(2) Uani 1 1 d . . . 
O16 O 0.7875(3) 0.4359(4) 0.1371(2) 0.048(2) Uani 1 1 d . . . 
O17 O 0.6302(4) 0.5526(4) 0.2444(2) 0.057(3) Uani 1 1 d . . . 
O18 O 0.5739(4) 0.6280(4) 0.2216(2) 0.055(2) Uani 1 1 d . . . 
O19 O 0.5285(3) 0.6405(4) 0.0247(2) 0.049(2) Uani 1 1 d . . . 
O20 O 0.5934(3) 0.6211(4) -0.0175(2) 0.042(2) Uani 1 1 d . . . 
O21 O 0.4986(3) 0.5352(4) 0.1862(3) 0.054(2) Uani 1 1 d . . . 
O22 O 0.5493(4) 0.4625(4) 0.2131(2) 0.055(2) Uani 1 1 d . . . 
O23 O 0.7107(3) 0.3425(3) 0.1020(2) 0.044(2) Uani 1 1 d . . . 
O24 O 0.7009(3) 0.3844(4) 0.0404(2) 0.042(2) Uani 1 1 d . . . 
O25 O 0.6808(3) 0.6919(4) 0.0243(2) 0.043(2) Uani 1 1 d . . . 
O26 O 0.6094(4) 0.7354(4) 0.0532(3) 0.054(2) Uani 1 1 d . . . 
O27 O 0.6729(3) 0.3057(4) -0.1214(2) 0.050(2) Uani 1 1 d . . . 
O28 O 0.5903(4) 0.2688(4) -0.1356(2) 0.051(2) Uani 1 1 d . . . 
O29 O 0.4114(3) 0.6374(3) 0.0753(2) 0.040(2) Uani 1 1 d . . . 
O30 O 0.3967(3) 0.5896(4) 0.1424(2) 0.042(2) Uani 1 1 d . . . 
O31 O 0.6928(3) 0.3993(4) -0.0539(2) 0.041(2) Uani 1 1 d . . . 
O32 O 0.6418(3) 0.4969(4) -0.0767(2) 0.040(2) Uani 1 1 d . . . 
O33 O 0.5091(3) 0.5920(3) 0.1072(2) 0.041(2) Uani 1 1 d . . . 
O34 O 0.6274(3) 0.3993(3) 0.1557(2) 0.0370(19) Uani 1 1 d . . . 
O35 O 0.6531(3) 0.5016(3) 0.0120(2) 0.0370(19) Uani 1 1 d . . . 
O36 O 0.6190(3) 0.5973(3) 0.0657(2) 0.0362(19) Uani 1 1 d . . . 
O37 O 0.6894(3) 0.4760(3) 0.0993(2) 0.0359(19) Uani 1 1 d . . . 
O38 O 0.6020(3) 0.5385(3) 0.15730(19) 0.0346(19) Uani 1 1 d . . . 
O39 O 0.5564(6) 0.3704(5) 0.2902(3) 0.097(4) Uani 1 1 d . . . 
H39 H 0.5541 0.3748 0.2654 0.146 Uiso 1 1 calc R . . 
  
loop_ 
 _atom_site_aniso_label 
 _atom_site_aniso_U_11 
 _atom_site_aniso_U_22 
 _atom_site_aniso_U_33 
 _atom_site_aniso_U_23 
 _atom_site_aniso_U_13 
 _atom_site_aniso_U_12 
C1 0.079(13) 0.063(10) 0.118(15) -0.045(10) 0.027(11) -0.038(9) 
C2 0.057(10) 0.044(8) 0.087(11) -0.032(8) 0.010(8) -0.008(7) 
C3 0.045(9) 0.045(8) 0.052(9) -0.012(7) 0.003(7) -0.004(7) 
C4 0.067(10) 0.025(7) 0.062(9) 0.003(6) 0.022(8) 0.003(6) 
C5 0.037(8) 0.037(7) 0.057(8) -0.016(6) 0.006(6) 0.004(6) 
C6 0.032(8) 0.039(7) 0.067(9) -0.021(7) 0.018(6) -0.007(6) 
C7 0.21(3) 0.097(15) 0.068(12) -0.011(11) 0.033(14) -0.040(16) 
C8 0.119(16) 0.049(9) 0.078(12) 0.012(9) -0.012(11) -0.004(10) 
C9 0.091(13) 0.057(10) 0.058(10) 0.011(8) -0.009(9) -0.023(9) 
C10 0.091(12) 0.047(8) 0.051(9) -0.004(7) 0.015(8) 0.002(8) 
C11 0.057(11) 0.053(9) 0.108(13) 0.015(9) -0.021(9) -0.013(8) 
C12 0.093(13) 0.048(9) 0.061(10) 0.023(8) 0.012(9) -0.011(9) 
C13 0.069(11) 0.087(11) 0.058(10) 0.014(8) -0.015(8) -0.028(9) 
C14 0.042(9) 0.058(8) 0.041(8) 0.004(6) -0.007(6) -0.006(7) 
C15 0.046(9) 0.043(7) 0.034(7) -0.001(6) 0.005(6) -0.011(6) 
C16 0.037(8) 0.053(8) 0.048(8) 0.013(7) -0.008(6) 0.000(6) 
C17 0.063(10) 0.035(7) 0.034(7) -0.006(6) -0.008(7) 0.003(6) 
C18 0.036(8) 0.048(8) 0.047(8) 0.002(6) -0.008(6) -0.007(6) 
C19 0.054(10) 0.073(10) 0.036(8) 0.010(7) 0.015(7) 0.027(8) 
C20 0.059(11) 0.104(12) 0.048(9) -0.009(8) 0.022(8) 0.004(9) 
C21 0.083(14) 0.111(15) 0.118(16) 0.009(12) 0.025(12) -0.023(12) 
C22 0.057(10) 0.053(8) 0.066(10) -0.002(7) 0.021(8) -0.014(7) 
C23 0.049(9) 0.043(7) 0.037(7) -0.004(6) 0.019(6) -0.015(6) 
C24 0.031(7) 0.039(7) 0.046(8) -0.004(6) 0.009(6) -0.001(6) 
C25 0.043(8) 0.038(7) 0.049(8) -0.017(6) 0.009(6) -0.014(6) 
C26 0.052(9) 0.038(7) 0.050(8) -0.003(6) 0.015(7) 0.005(6) 
C27 0.058(10) 0.037(7) 0.042(9) 0.002(6) -0.007(7) 0.009(7) 
C28 0.044(10) 0.130(14) 0.054(9) 0.022(9) -0.019(7) -0.025(9) 
C29 0.060(11) 0.063(10) 0.044(9) -0.021(8) 0.002(7) -0.002(8) 
C30 0.19(2) 0.119(15) 0.050(10) -0.037(10) -0.012(12) 0.065(15) 
C31 0.051(9) 0.030(6) 0.038(8) 0.001(6) 0.027(7) 0.001(6) 
C32 0.036(8) 0.052(8) 0.038(7) -0.009(6) 0.003(6) 0.001(6) 
C33 0.032(8) 0.044(8) 0.051(8) 0.003(7) 0.007(6) -0.001(7) 
C34 0.070(12) 0.073(11) 0.093(12) 0.029(9) 0.019(9) 0.001(9) 
C35 0.036(8) 0.032(7) 0.056(9) -0.006(7) 0.006(6) -0.005(6) 
C36 0.064(11) 0.058(9) 0.064(10) 0.005(8) -0.020(8) -0.002(8) 
C37 0.046(9) 0.035(7) 0.047(8) 0.007(6) 0.002(7) -0.005(7) 
C38 0.065(11) 0.048(9) 0.109(13) 0.013(9) 0.034(9) 0.005(8) 
C39 0.053(10) 0.073(10) 0.026(7) 0.003(7) 0.009(7) 0.009(8) 
C40 0.051(10) 0.074(10) 0.069(10) -0.029(8) 0.003(8) 0.010(8) 
C41 0.049(9) 0.057(8) 0.032(7) -0.010(6) 0.006(6) 0.009(7) 
C42 0.055(9) 0.070(9) 0.030(7) -0.008(6) 0.015(6) 0.003(7) 
C43 0.044(9) 0.067(9) 0.044(8) -0.012(7) -0.012(6) 0.020(7) 
C44 0.050(9) 0.054(8) 0.032(7) 0.011(6) 0.012(6) 0.007(7) 
C45 0.046(9) 0.052(8) 0.076(10) -0.034(8) 0.008(7) -0.003(7) 
C46 0.049(9) 0.045(8) 0.042(8) 0.006(6) -0.012(6) -0.010(6) 
C47 0.036(8) 0.054(8) 0.045(8) -0.006(6) 0.012(6) -0.004(6) 
C48 0.071(10) 0.045(8) 0.032(7) 0.003(6) 0.002(7) -0.013(7) 
C49 0.081(12) 0.042(8) 0.053(9) -0.012(7) -0.016(8) -0.007(8) 
C50 0.042(8) 0.051(8) 0.045(8) 0.003(7) 0.008(6) 0.007(7) 
C51 0.092(14) 0.083(12) 0.064(11) -0.001(9) 0.015(9) -0.007(10) 
Mn1 0.0391(11) 0.0355(10) 0.0322(10) -0.0016(8) 0.0096(8) -0.0021(9) 
Mn2 0.0367(11) 0.0329(9) 0.0334(10) -0.0023(8) 0.0040(8) -0.0009(8) 
Mn3 0.0353(11) 0.0389(10) 0.0339(10) -0.0029(8) 0.0032(8) 0.0005(9) 
Mn4 0.0395(12) 0.0336(10) 0.0342(10) 0.0025(8) 0.0011(9) 0.0008(8) 
Mn5 0.0406(12) 0.0374(10) 0.0344(10) 0.0007(8) 0.0038(9) -0.0004(9) 
Mn6 0.0385(11) 0.0426(11) 0.0307(10) -0.0022(8) 0.0072(8) 0.0017(9) 
Mn7 0.0388(11) 0.0391(10) 0.0331(10) -0.0048(8) 0.0050(9) 0.0042(9) 
Mn8 0.0403(12) 0.0374(10) 0.0363(11) -0.0018(8) 0.0095(9) 0.0033(9) 
Mn9 0.0365(12) 0.0553(12) 0.0312(10) -0.0077(9) 0.0036(8) 0.0061(10) 
Mn10 0.0378(11) 0.0337(9) 0.0363(10) -0.0044(8) 0.0045(9) -0.0032(8) 
Mn11 0.0432(12) 0.0380(10) 0.0387(11) 0.0008(9) -0.0001(9) -0.0015(9) 
N1 0.052(7) 0.028(5) 0.046(7) -0.002(5) 0.003(5) -0.010(5) 
N2 0.059(8) 0.046(7) 0.057(7) -0.007(6) -0.005(6) -0.014(6) 
O1 0.044(5) 0.041(5) 0.039(5) -0.002(4) 0.014(4) 0.007(4) 
O2 0.041(5) 0.043(5) 0.041(5) -0.001(4) 0.013(4) 0.004(4) 
O3 0.035(5) 0.041(5) 0.042(5) -0.007(4) 0.012(4) 0.004(4) 
O4 0.061(6) 0.047(5) 0.039(5) -0.007(4) 0.003(4) -0.005(5) 
O5 0.044(6) 0.047(5) 0.064(6) 0.010(4) 0.001(5) -0.005(4) 
O6 0.061(7) 0.047(5) 0.051(6) 0.002(4) 0.009(5) -0.001(5) 
O7 0.037(5) 0.035(4) 0.036(5) 0.004(4) -0.003(4) 0.002(4) 
O8 0.049(6) 0.038(5) 0.029(4) -0.003(4) -0.003(4) -0.006(4) 
O9 0.035(5) 0.038(4) 0.042(5) 0.009(4) -0.003(4) -0.001(4) 
O10 0.038(6) 0.068(6) 0.035(5) -0.017(4) 0.006(4) -0.002(5) 
O11 0.040(5) 0.061(5) 0.039(5) -0.007(4) 0.006(4) 0.003(4) 
O12 0.035(5) 0.040(5) 0.037(5) -0.002(4) 0.012(4) -0.004(4) 
O13 0.036(5) 0.038(4) 0.029(4) -0.003(4) 0.006(4) -0.001(4) 
O14 0.039(5) 0.034(4) 0.039(5) -0.003(4) 0.011(4) -0.006(4) 
O15 0.034(5) 0.051(5) 0.047(5) -0.002(4) -0.001(4) -0.001(4) 
O16 0.042(6) 0.063(6) 0.040(5) 0.013(4) -0.002(4) -0.006(5) 
O17 0.081(8) 0.047(5) 0.042(5) -0.007(4) -0.012(5) 0.013(5) 
O18 0.059(7) 0.065(6) 0.042(5) -0.014(5) -0.011(5) 0.017(5) 
O19 0.041(6) 0.063(6) 0.043(5) -0.012(4) 0.007(4) 0.003(4) 
O20 0.044(6) 0.049(5) 0.031(5) 0.001(4) 0.012(4) 0.004(4) 
O21 0.041(6) 0.050(6) 0.071(7) 0.012(5) 0.007(5) -0.004(4) 
O22 0.044(6) 0.059(6) 0.061(6) 0.020(5) 0.011(5) 0.002(5) 
O23 0.063(6) 0.035(5) 0.033(5) -0.001(4) 0.006(4) -0.002(4) 
O24 0.050(6) 0.035(5) 0.041(5) 0.001(4) 0.002(4) 0.000(4) 
O25 0.040(5) 0.045(5) 0.043(5) 0.003(4) 0.012(4) -0.002(4) 
O26 0.049(6) 0.035(5) 0.077(7) 0.009(4) 0.030(5) 0.006(4) 
O27 0.044(6) 0.065(6) 0.040(5) -0.012(5) 0.007(4) 0.008(5) 
O28 0.046(6) 0.054(5) 0.054(6) -0.013(4) 0.003(5) 0.001(5) 
O29 0.044(5) 0.044(5) 0.032(5) -0.007(4) 0.002(4) 0.011(4) 
O30 0.042(5) 0.055(5) 0.031(5) -0.002(4) 0.003(4) 0.006(4) 
O31 0.038(5) 0.047(5) 0.037(5) -0.002(4) 0.004(4) 0.013(4) 
O32 0.034(5) 0.052(5) 0.033(4) -0.004(4) 0.004(4) 0.008(4) 
O33 0.044(5) 0.034(4) 0.046(5) -0.006(4) 0.008(4) -0.001(4) 
O34 0.043(5) 0.037(4) 0.030(4) 0.008(4) -0.003(4) -0.010(4) 
O35 0.040(5) 0.035(4) 0.036(5) -0.001(4) 0.005(4) 0.003(4) 
O36 0.041(5) 0.036(4) 0.032(4) 0.004(3) 0.008(4) -0.001(4) 
O37 0.039(5) 0.032(4) 0.037(5) 0.000(4) 0.001(4) -0.002(4) 
O38 0.038(5) 0.038(4) 0.028(4) -0.002(3) 0.003(4) -0.004(4) 
O39 0.135(12) 0.089(8) 0.067(7) 0.006(6) 0.032(8) -0.006(8) 
  
_geom_special_details 
; 
 All esds (except the esd in the dihedral angle between two l.s. planes) 
 are estimated using the full covariance matrix.  The cell esds are taken 
 into account individually in the estimation of esds in distances, angles 
 and torsion angles; correlations between esds in cell parameters are only 
 used when they are defined by crystal symmetry.  An approximate (isotropic) 
 treatment of cell esds is used for estimating esds involving l.s. planes. 
; 
  
loop_ 
 _geom_bond_atom_site_label_1 
 _geom_bond_atom_site_label_2 
 _geom_bond_distance 
 _geom_bond_site_symmetry_2 
 _geom_bond_publ_flag 
C1 C2 1.468(18) . ? 
C1 H1A 0.9800 . ? 
C1 H1B 0.9800 . ? 
C1 H1C 0.9800 . ? 
C2 C3 1.503(15) . ? 
C2 H2A 0.9900 . ? 
C2 H2B 0.9900 . ? 
C3 C6 1.509(16) . ? 
C3 C4 1.521(17) . ? 
C3 C5 1.564(16) . ? 
C4 O1 1.445(13) . ? 
C4 H4A 0.9900 . ? 
C4 H4B 0.9900 . ? 
C5 O3 1.458(12) . ? 
C5 H5A 0.9900 . ? 
C5 H5B 0.9900 . ? 
C6 O2 1.442(12) . ? 
C6 H6A 0.9900 . ? 
C6 H6B 0.9900 . ? 
C7 C8 1.54(2) . ? 
C7 H7A 0.9800 . ? 
C7 H7B 0.9800 . ? 
C7 H7C 0.9800 . ? 
C8 C9 1.529(18) . ? 
C8 H8A 0.9900 . ? 
C8 H8B 0.9900 . ? 
C9 C11 1.544(19) . ? 
C9 C10 1.587(18) . ? 
C9 C12 1.594(19) . ? 
C10 O4 1.373(13) . ? 
C10 H10A 0.9900 . ? 
C10 H10B 0.9900 . ? 
C11 O5 1.365(14) . ? 
C11 H11A 0.9900 . ? 
C11 H11B 0.9900 . ? 
C12 O6 1.377(14) . ? 
C12 H12A 0.9900 . ? 
C12 H12B 0.9900 . ? 
C13 C14 1.542(16) . ? 
C13 H13A 0.9800 . ? 
C13 H13B 0.9800 . ? 
C13 H13C 0.9800 . ? 
C14 C15 1.528(15) . ? 
C14 H14A 0.9900 . ? 
C14 H14B 0.9900 . ? 
C15 C18 1.475(15) . ? 
C15 C17 1.523(16) . ? 
C15 C16 1.533(16) . ? 
C16 O7 1.427(13) . ? 
C16 H16A 0.9900 . ? 
C16 H16B 0.9900 . ? 
C17 O8 1.426(13) . ? 
C17 H17A 0.9900 . ? 
C17 H17B 0.9900 . ? 
C18 O9 1.435(12) . ? 
C18 H18A 0.9900 . ? 
C18 H18B 0.9900 . ? 
C19 O10 1.248(16) . ? 
C19 O11 1.293(15) . ? 
C19 C20 1.513(17) . ? 
C20 H20A 0.9800 . ? 
C20 H20B 0.9800 . ? 
C20 H20C 0.9800 . ? 
C21 C22 1.590(18) . ? 
C21 H21A 0.9800 . ? 
C21 H21B 0.9800 . ? 
C21 H21C 0.9800 . ? 
C22 C23 1.567(16) . ? 
C22 H22A 0.9900 . ? 
C22 H22B 0.9900 . ? 
C23 C24 1.491(16) . ? 
C23 C25 1.524(15) . ? 
C23 C26 1.576(15) . ? 
C24 O12 1.380(12) . ? 
C24 H24A 0.9900 . ? 
C24 H24B 0.9900 . ? 
C25 O13 1.430(12) . ? 
C25 H25A 0.9900 . ? 
C25 H25B 0.9900 . ? 
C26 O14 1.428(13) . ? 
C26 H26A 0.9900 . ? 
C26 H26B 0.9900 . ? 
C27 O15 1.222(13) . ? 
C27 O16 1.231(14) . ? 
C27 C28 1.546(17) . ? 
C28 H28A 0.9800 . ? 
C28 H28B 0.9800 . ? 
C28 H28C 0.9800 . ? 
C29 O17 1.236(15) . ? 
C29 O18 1.259(15) . ? 
C29 C30 1.531(17) . ? 
C30 H30A 0.9800 . ? 
C30 H30B 0.9800 . ? 
C30 H30C 0.9800 . ? 
C31 O19 1.238(12) . ? 
C31 O20 1.269(13) . ? 
C31 C32 1.478(16) . ? 
C32 H32A 0.9800 . ? 
C32 H32B 0.9800 . ? 
C32 H32C 0.9800 . ? 
C33 O21 1.207(13) . ? 
C33 O22 1.235(14) . ? 
C33 C34 1.471(17) . ? 
C34 H34A 0.9800 . ? 
C34 H34B 0.9800 . ? 
C34 H34C 0.9800 . ? 
C35 O23 1.260(13) . ? 
C35 O24 1.263(13) . ? 
C35 C36 1.500(16) . ? 
C36 H36A 0.9800 . ? 
C36 H36B 0.9800 . ? 
C36 H36C 0.9800 . ? 
C37 O26 1.206(14) . ? 
C37 O25 1.289(14) . ? 
C37 C38 1.475(16) . ? 
C38 H38A 0.9800 . ? 
C38 H38B 0.9800 . ? 
C38 H38C 0.9800 . ? 
C39 O28 1.262(15) . ? 
C39 O27 1.289(15) . ? 
C39 C40 1.568(17) . ? 
C40 H40A 0.9800 . ? 
C40 H40B 0.9800 . ? 
C40 H40C 0.9800 . ? 
C41 O29 1.415(12) . ? 
C41 H41A 0.9800 . ? 
C41 H41B 0.9800 . ? 
C41 H41C 0.9800 . ? 
C42 O30 1.419(11) . ? 
C42 H42A 0.9800 . ? 
C42 H42B 0.9800 . ? 
C42 H42C 0.9800 . ? 
C43 O31 1.409(12) . ? 
C43 H43A 0.9800 . ? 
C43 H43B 0.9800 . ? 
C43 H43C 0.9800 . ? 
C44 O32 1.438(12) . ? 
C44 H44A 0.9800 . ? 
C44 H44B 0.9800 . ? 
C44 H44C 0.9800 . ? 
C45 O33 1.445(12) . ? 
C45 H45A 0.9800 . ? 
C45 H45B 0.9800 . ? 
C45 H45C 0.9800 . ? 
C46 O34 1.432(12) . ? 
C46 H46A 0.9800 . ? 
C46 H46B 0.9800 . ? 
C46 H46C 0.9800 . ? 
C47 O35 1.466(12) . ? 
C47 H47A 0.9800 . ? 
C47 H47B 0.9800 . ? 
C47 H47C 0.9800 . ? 
C48 C49 1.343(16) . ? 
C48 N1 1.385(14) . ? 
C48 H48 0.9500 . ? 
C49 N2 1.399(15) . ? 
C49 H49 0.9500 . ? 
C50 N2 1.315(14) . ? 
C50 N1 1.328(14) . ? 
C50 H50 0.9500 . ? 
C51 O39 1.450(15) . ? 
C51 H51A 0.9800 . ? 
C51 H51B 0.9800 . ? 
C51 H51C 0.9800 . ? 
Mn1 O36 1.850(7) . ? 
Mn1 O12 1.971(7) . ? 
Mn1 O25 2.013(8) . ? 
Mn1 O35 2.022(7) . ? 
Mn1 O20 2.117(8) . ? 
Mn1 O14 2.161(8) . ? 
Mn1 Mn6 3.145(3) . ? 
Mn1 Mn2 3.184(3) . ? 
Mn2 O37 1.836(7) . ? 
Mn2 O14 1.938(7) . ? 
Mn2 O13 1.968(7) . ? 
Mn2 O24 1.985(8) . ? 
Mn2 O15 2.124(8) . ? 
Mn2 O35 2.242(8) . ? 
Mn2 Mn6 3.147(3) . ? 
Mn2 Mn4 3.209(3) . ? 
Mn3 O38 1.824(7) . ? 
Mn3 O3 1.959(7) . ? 
Mn3 O21 2.000(8) . ? 
Mn3 O2 2.003(7) . ? 
Mn3 O18 2.072(8) . ? 
Mn3 O33 2.213(8) . ? 
Mn3 Mn7 3.090(3) . ? 
Mn3 Mn5 3.207(3) . ? 
Mn3 Mn8 3.235(3) . ? 
Mn4 O37 1.825(7) . ? 
Mn4 O7 1.925(7) . ? 
Mn4 O23 2.035(8) . ? 
Mn4 O9 2.043(8) . ? 
Mn4 O16 2.046(8) . ? 
Mn4 O34 2.138(8) . ? 
Mn4 Mn11 3.138(3) . ? 
Mn4 Mn5 3.169(3) . ? 
Mn5 O38 1.843(7) . ? 
Mn5 O8 1.925(7) . ? 
Mn5 O9 1.968(8) . ? 
Mn5 O22 1.983(9) . ? 
Mn5 O17 2.139(8) . ? 
Mn5 O34 2.232(7) . ? 
Mn5 Mn11 3.134(3) . ? 
Mn6 O32 1.881(8) . ? 
Mn6 O13 1.907(7) . ? 
Mn6 O31 1.988(8) . ? 
Mn6 O12 1.992(7) . ? 
Mn6 O35 2.129(7) . ? 
Mn6 O11 2.152(8) . ? 
Mn6 Mn9 3.002(3) . ? 
Mn7 O29 1.898(8) . ? 
Mn7 O3 1.925(8) . ? 
Mn7 O33 1.962(8) . ? 
Mn7 O28 1.985(8) 5_665 ? 
Mn7 O1 2.100(8) . ? 
Mn7 O30 2.146(8) . ? 
Mn7 Mn9 3.009(3) 5_665 ? 
Mn7 Mn8 3.169(3) . ? 
Mn8 O36 1.852(7) . ? 
Mn8 O1 1.930(7) . ? 
Mn8 O2 1.984(8) . ? 
Mn8 O19 1.990(8) . ? 
Mn8 O26 2.107(8) . ? 
Mn8 O33 2.219(7) . ? 
Mn9 O30 1.857(8) 5_665 ? 
Mn9 O31 1.892(8) . ? 
Mn9 O29 1.983(8) 5_665 ? 
Mn9 O10 1.983(8) . ? 
Mn9 O32 2.136(7) . ? 
Mn9 O27 2.172(8) . ? 
Mn9 Mn7 3.009(3) 5_665 ? 
Mn10 O36 2.081(7) . ? 
Mn10 O37 2.097(7) . ? 
Mn10 O38 2.102(7) . ? 
Mn10 N1 2.134(9) . ? 
Mn11 O6 1.839(8) . ? 
Mn11 O4 1.841(8) . ? 
Mn11 O5 1.880(9) . ? 
Mn11 O34 1.987(7) . ? 
Mn11 O8 2.017(7) . ? 
Mn11 O7 2.042(8) . ? 
O28 Mn7 1.985(8) 5_665 ? 
O29 Mn9 1.983(8) 5_665 ? 
O30 Mn9 1.857(8) 5_665 ? 
O39 H39 0.8400 . ? 
  
loop_ 
 _geom_angle_atom_site_label_1 
 _geom_angle_atom_site_label_2 
 _geom_angle_atom_site_label_3 
 _geom_angle 
 _geom_angle_site_symmetry_1 
 _geom_angle_site_symmetry_3 
 _geom_angle_publ_flag 
C2 C1 H1A 109.5 . . ? 
C2 C1 H1B 109.5 . . ? 
H1A C1 H1B 109.5 . . ? 
C2 C1 H1C 109.5 . . ? 
H1A C1 H1C 109.5 . . ? 
H1B C1 H1C 109.5 . . ? 
C1 C2 C3 115.4(12) . . ? 
C1 C2 H2A 108.4 . . ? 
C3 C2 H2A 108.4 . . ? 
C1 C2 H2B 108.4 . . ? 
C3 C2 H2B 108.4 . . ? 
H2A C2 H2B 107.5 . . ? 
C2 C3 C6 109.8(11) . . ? 
C2 C3 C4 105.9(11) . . ? 
C6 C3 C4 110.6(10) . . ? 
C2 C3 C5 109.2(10) . . ? 
C6 C3 C5 110.7(10) . . ? 
C4 C3 C5 110.5(10) . . ? 
O1 C4 C3 115.6(9) . . ? 
O1 C4 H4A 108.4 . . ? 
C3 C4 H4A 108.4 . . ? 
O1 C4 H4B 108.4 . . ? 
C3 C4 H4B 108.4 . . ? 
H4A C4 H4B 107.4 . . ? 
O3 C5 C3 111.8(9) . . ? 
O3 C5 H5A 109.2 . . ? 
C3 C5 H5A 109.2 . . ? 
O3 C5 H5B 109.2 . . ? 
C3 C5 H5B 109.2 . . ? 
H5A C5 H5B 107.9 . . ? 
O2 C6 C3 113.6(10) . . ? 
O2 C6 H6A 108.8 . . ? 
C3 C6 H6A 108.8 . . ? 
O2 C6 H6B 108.9 . . ? 
C3 C6 H6B 108.9 . . ? 
H6A C6 H6B 107.7 . . ? 
C8 C7 H7A 109.5 . . ? 
C8 C7 H7B 109.5 . . ? 
H7A C7 H7B 109.5 . . ? 
C8 C7 H7C 109.5 . . ? 
H7A C7 H7C 109.5 . . ? 
H7B C7 H7C 109.5 . . ? 
C9 C8 C7 116.9(15) . . ? 
C9 C8 H8A 108.1 . . ? 
C7 C8 H8A 108.1 . . ? 
C9 C8 H8B 108.1 . . ? 
C7 C8 H8B 108.1 . . ? 
H8A C8 H8B 107.3 . . ? 
C8 C9 C11 107.4(13) . . ? 
C8 C9 C10 110.5(12) . . ? 
C11 C9 C10 110.1(12) . . ? 
C8 C9 C12 113.8(11) . . ? 
C11 C9 C12 107.7(12) . . ? 
C10 C9 C12 107.2(13) . . ? 
O4 C10 C9 111.8(10) . . ? 
O4 C10 H10A 109.3 . . ? 
C9 C10 H10A 109.3 . . ? 
O4 C10 H10B 109.3 . . ? 
C9 C10 H10B 109.3 . . ? 
H10A C10 H10B 107.9 . . ? 
O5 C11 C9 112.2(12) . . ? 
O5 C11 H11A 109.2 . . ? 
C9 C11 H11A 109.2 . . ? 
O5 C11 H11B 109.2 . . ? 
C9 C11 H11B 109.2 . . ? 
H11A C11 H11B 107.9 . . ? 
O6 C12 C9 114.6(10) . . ? 
O6 C12 H12A 108.6 . . ? 
C9 C12 H12A 108.6 . . ? 
O6 C12 H12B 108.6 . . ? 
C9 C12 H12B 108.6 . . ? 
H12A C12 H12B 107.6 . . ? 
C14 C13 H13A 109.5 . . ? 
C14 C13 H13B 109.5 . . ? 
H13A C13 H13B 109.5 . . ? 
C14 C13 H13C 109.5 . . ? 
H13A C13 H13C 109.5 . . ? 
H13B C13 H13C 109.5 . . ? 
C15 C14 C13 116.7(10) . . ? 
C15 C14 H14A 108.1 . . ? 
C13 C14 H14A 108.1 . . ? 
C15 C14 H14B 108.1 . . ? 
C13 C14 H14B 108.1 . . ? 
H14A C14 H14B 107.3 . . ? 
C18 C15 C17 108.9(10) . . ? 
C18 C15 C14 106.3(10) . . ? 
C17 C15 C14 111.0(9) . . ? 
C18 C15 C16 114.1(10) . . ? 
C17 C15 C16 107.1(10) . . ? 
C14 C15 C16 109.4(10) . . ? 
O7 C16 C15 114.7(10) . . ? 
O7 C16 H16A 108.6 . . ? 
C15 C16 H16A 108.6 . . ? 
O7 C16 H16B 108.6 . . ? 
C15 C16 H16B 108.6 . . ? 
H16A C16 H16B 107.6 . . ? 
O8 C17 C15 114.8(9) . . ? 
O8 C17 H17A 108.6 . . ? 
C15 C17 H17A 108.6 . . ? 
O8 C17 H17B 108.6 . . ? 
C15 C17 H17B 108.6 . . ? 
H17A C17 H17B 107.6 . . ? 
O9 C18 C15 115.2(10) . . ? 
O9 C18 H18A 108.5 . . ? 
C15 C18 H18A 108.5 . . ? 
O9 C18 H18B 108.5 . . ? 
C15 C18 H18B 108.5 . . ? 
H18A C18 H18B 107.5 . . ? 
O10 C19 O11 127.4(12) . . ? 
O10 C19 C20 118.0(12) . . ? 
O11 C19 C20 114.5(13) . . ? 
C19 C20 H20A 109.5 . . ? 
C19 C20 H20B 109.5 . . ? 
H20A C20 H20B 109.5 . . ? 
C19 C20 H20C 109.5 . . ? 
H20A C20 H20C 109.5 . . ? 
H20B C20 H20C 109.5 . . ? 
C22 C21 H21A 109.5 . . ? 
C22 C21 H21B 109.5 . . ? 
H21A C21 H21B 109.5 . . ? 
C22 C21 H21C 109.5 . . ? 
H21A C21 H21C 109.5 . . ? 
H21B C21 H21C 109.5 . . ? 
C23 C22 C21 112.0(11) . . ? 
C23 C22 H22A 109.2 . . ? 
C21 C22 H22A 109.2 . . ? 
C23 C22 H22B 109.2 . . ? 
C21 C22 H22B 109.2 . . ? 
H22A C22 H22B 107.9 . . ? 
C24 C23 C25 113.4(10) . . ? 
C24 C23 C22 110.2(10) . . ? 
C25 C23 C22 108.9(10) . . ? 
C24 C23 C26 111.0(10) . . ? 
C25 C23 C26 108.7(9) . . ? 
C22 C23 C26 104.2(10) . . ? 
O12 C24 C23 114.1(9) . . ? 
O12 C24 H24A 108.7 . . ? 
C23 C24 H24A 108.7 . . ? 
O12 C24 H24B 108.7 . . ? 
C23 C24 H24B 108.7 . . ? 
H24A C24 H24B 107.6 . . ? 
O13 C25 C23 112.0(10) . . ? 
O13 C25 H25A 109.2 . . ? 
C23 C25 H25A 109.2 . . ? 
O13 C25 H25B 109.2 . . ? 
C23 C25 H25B 109.2 . . ? 
H25A C25 H25B 107.9 . . ? 
O14 C26 C23 113.4(10) . . ? 
O14 C26 H26A 108.9 . . ? 
C23 C26 H26A 108.9 . . ? 
O14 C26 H26B 108.9 . . ? 
C23 C26 H26B 108.9 . . ? 
H26A C26 H26B 107.7 . . ? 
O15 C27 O16 127.4(13) . . ? 
O15 C27 C28 114.9(12) . . ? 
O16 C27 C28 117.7(12) . . ? 
C27 C28 H28A 109.5 . . ? 
C27 C28 H28B 109.5 . . ? 
H28A C28 H28B 109.5 . . ? 
C27 C28 H28C 109.5 . . ? 
H28A C28 H28C 109.5 . . ? 
H28B C28 H28C 109.5 . . ? 
O17 C29 O18 128.2(12) . . ? 
O17 C29 C30 116.2(14) . . ? 
O18 C29 C30 115.6(13) . . ? 
C29 C30 H30A 109.5 . . ? 
C29 C30 H30B 109.5 . . ? 
H30A C30 H30B 109.5 . . ? 
C29 C30 H30C 109.5 . . ? 
H30A C30 H30C 109.5 . . ? 
H30B C30 H30C 109.5 . . ? 
O19 C31 O20 122.8(12) . . ? 
O19 C31 C32 121.2(12) . . ? 
O20 C31 C32 116.0(10) . . ? 
C31 C32 H32A 109.5 . . ? 
C31 C32 H32B 109.5 . . ? 
H32A C32 H32B 109.5 . . ? 
C31 C32 H32C 109.5 . . ? 
H32A C32 H32C 109.5 . . ? 
H32B C32 H32C 109.5 . . ? 
O21 C33 O22 125.4(12) . . ? 
O21 C33 C34 118.7(12) . . ? 
O22 C33 C34 115.9(12) . . ? 
C33 C34 H34A 109.5 . . ? 
C33 C34 H34B 109.5 . . ? 
H34A C34 H34B 109.5 . . ? 
C33 C34 H34C 109.5 . . ? 
H34A C34 H34C 109.5 . . ? 
H34B C34 H34C 109.5 . . ? 
O23 C35 O24 126.6(11) . . ? 
O23 C35 C36 118.3(11) . . ? 
O24 C35 C36 115.0(11) . . ? 
C35 C36 H36A 109.5 . . ? 
C35 C36 H36B 109.5 . . ? 
H36A C36 H36B 109.5 . . ? 
C35 C36 H36C 109.5 . . ? 
H36A C36 H36C 109.5 . . ? 
H36B C36 H36C 109.5 . . ? 
O26 C37 O25 127.0(11) . . ? 
O26 C37 C38 116.4(12) . . ? 
O25 C37 C38 116.5(12) . . ? 
C37 C38 H38A 109.5 . . ? 
C37 C38 H38B 109.5 . . ? 
H38A C38 H38B 109.5 . . ? 
C37 C38 H38C 109.5 . . ? 
H38A C38 H38C 109.5 . . ? 
H38B C38 H38C 109.5 . . ? 
O28 C39 O27 125.5(13) . . ? 
O28 C39 C40 113.2(13) . . ? 
O27 C39 C40 121.2(12) . . ? 
C39 C40 H40A 109.5 . . ? 
C39 C40 H40B 109.5 . . ? 
H40A C40 H40B 109.5 . . ? 
C39 C40 H40C 109.5 . . ? 
H40A C40 H40C 109.5 . . ? 
H40B C40 H40C 109.5 . . ? 
O29 C41 H41A 109.5 . . ? 
O29 C41 H41B 109.5 . . ? 
H41A C41 H41B 109.5 . . ? 
O29 C41 H41C 109.5 . . ? 
H41A C41 H41C 109.5 . . ? 
H41B C41 H41C 109.5 . . ? 
O30 C42 H42A 109.5 . . ? 
O30 C42 H42B 109.5 . . ? 
H42A C42 H42B 109.5 . . ? 
O30 C42 H42C 109.5 . . ? 
H42A C42 H42C 109.5 . . ? 
H42B C42 H42C 109.5 . . ? 
O31 C43 H43A 109.5 . . ? 
O31 C43 H43B 109.5 . . ? 
H43A C43 H43B 109.5 . . ? 
O31 C43 H43C 109.5 . . ? 
H43A C43 H43C 109.5 . . ? 
H43B C43 H43C 109.5 . . ? 
O32 C44 H44A 109.5 . . ? 
O32 C44 H44B 109.5 . . ? 
H44A C44 H44B 109.5 . . ? 
O32 C44 H44C 109.5 . . ? 
H44A C44 H44C 109.5 . . ? 
H44B C44 H44C 109.5 . . ? 
O33 C45 H45A 109.5 . . ? 
O33 C45 H45B 109.5 . . ? 
H45A C45 H45B 109.5 . . ? 
O33 C45 H45C 109.5 . . ? 
H45A C45 H45C 109.5 . . ? 
H45B C45 H45C 109.5 . . ? 
O34 C46 H46A 109.5 . . ? 
O34 C46 H46B 109.5 . . ? 
H46A C46 H46B 109.5 . . ? 
O34 C46 H46C 109.5 . . ? 
H46A C46 H46C 109.5 . . ? 
H46B C46 H46C 109.5 . . ? 
O35 C47 H47A 109.5 . . ? 
O35 C47 H47B 109.5 . . ? 
H47A C47 H47B 109.5 . . ? 
O35 C47 H47C 109.5 . . ? 
H47A C47 H47C 109.5 . . ? 
H47B C47 H47C 109.5 . . ? 
C49 C48 N1 110.4(11) . . ? 
C49 C48 H48 124.8 . . ? 
N1 C48 H48 124.8 . . ? 
C48 C49 N2 105.8(11) . . ? 
C48 C49 H49 127.1 . . ? 
N2 C49 H49 127.1 . . ? 
N2 C50 N1 113.3(11) . . ? 
N2 C50 H50 123.4 . . ? 
N1 C50 H50 123.4 . . ? 
O39 C51 H51A 109.5 . . ? 
O39 C51 H51B 109.5 . . ? 
H51A C51 H51B 109.5 . . ? 
O39 C51 H51C 109.5 . . ? 
H51A C51 H51C 109.5 . . ? 
H51B C51 H51C 109.5 . . ? 
O36 Mn1 O12 171.7(3) . . ? 
O36 Mn1 O25 95.3(3) . . ? 
O12 Mn1 O25 91.4(3) . . ? 
O36 Mn1 O35 92.9(3) . . ? 
O12 Mn1 O35 79.7(3) . . ? 
O25 Mn1 O35 167.9(3) . . ? 
O36 Mn1 O20 94.1(3) . . ? 
O12 Mn1 O20 90.3(3) . . ? 
O25 Mn1 O20 93.0(3) . . ? 
O35 Mn1 O20 95.2(3) . . ? 
O36 Mn1 O14 90.0(3) . . ? 
O12 Mn1 O14 85.2(3) . . ? 
O25 Mn1 O14 90.4(3) . . ? 
O35 Mn1 O14 80.8(3) . . ? 
O20 Mn1 O14 174.5(3) . . ? 
O36 Mn1 Mn6 135.0(2) . . ? 
O12 Mn1 Mn6 37.7(2) . . ? 
O25 Mn1 Mn6 129.0(2) . . ? 
O35 Mn1 Mn6 42.0(2) . . ? 
O20 Mn1 Mn6 91.6(2) . . ? 
O14 Mn1 Mn6 82.87(19) . . ? 
O36 Mn1 Mn2 89.3(2) . . ? 
O12 Mn1 Mn2 82.9(2) . . ? 
O25 Mn1 Mn2 126.8(2) . . ? 
O35 Mn1 Mn2 44.4(2) . . ? 
O20 Mn1 Mn2 139.6(2) . . ? 
O14 Mn1 Mn2 36.55(19) . . ? 
Mn6 Mn1 Mn2 59.63(6) . . ? 
O37 Mn2 O14 89.5(3) . . ? 
O37 Mn2 O13 176.4(3) . . ? 
O14 Mn2 O13 88.9(3) . . ? 
O37 Mn2 O24 92.0(3) . . ? 
O14 Mn2 O24 165.8(3) . . ? 
O13 Mn2 O24 88.8(3) . . ? 
O37 Mn2 O15 95.4(3) . . ? 
O14 Mn2 O15 95.9(3) . . ? 
O13 Mn2 O15 88.0(3) . . ? 
O24 Mn2 O15 98.0(3) . . ? 
O37 Mn2 O35 99.1(3) . . ? 
O14 Mn2 O35 80.6(3) . . ? 
O13 Mn2 O35 77.4(3) . . ? 
O24 Mn2 O35 85.2(3) . . ? 
O15 Mn2 O35 165.0(3) . . ? 
O37 Mn2 Mn6 141.6(2) . . ? 
O14 Mn2 Mn6 86.3(2) . . ? 
O13 Mn2 Mn6 35.0(2) . . ? 
O24 Mn2 Mn6 83.7(2) . . ? 
O15 Mn2 Mn6 123.0(2) . . ? 
O35 Mn2 Mn6 42.54(18) . . ? 
O37 Mn2 Mn1 93.3(2) . . ? 
O14 Mn2 Mn1 41.6(2) . . ? 
O13 Mn2 Mn1 83.3(2) . . ? 
O24 Mn2 Mn1 124.2(2) . . ? 
O15 Mn2 Mn1 136.5(2) . . ? 
O35 Mn2 Mn1 39.12(18) . . ? 
Mn6 Mn2 Mn1 59.56(5) . . ? 
O37 Mn2 Mn4 28.7(2) . . ? 
O14 Mn2 Mn4 109.1(2) . . ? 
O13 Mn2 Mn4 154.7(2) . . ? 
O24 Mn2 Mn4 77.9(2) . . ? 
O15 Mn2 Mn4 73.0(2) . . ? 
O35 Mn2 Mn4 121.9(2) . . ? 
Mn6 Mn2 Mn4 157.42(8) . . ? 
Mn1 Mn2 Mn4 121.91(7) . . ? 
O38 Mn3 O3 174.8(3) . . ? 
O38 Mn3 O21 93.3(3) . . ? 
O3 Mn3 O21 88.8(3) . . ? 
O38 Mn3 O2 89.1(3) . . ? 
O3 Mn3 O2 87.8(3) . . ? 
O21 Mn3 O2 165.8(3) . . ? 
O38 Mn3 O18 97.3(3) . . ? 
O3 Mn3 O18 87.3(3) . . ? 
O21 Mn3 O18 92.8(4) . . ? 
O2 Mn3 O18 100.8(3) . . ? 
O38 Mn3 O33 99.4(3) . . ? 
O3 Mn3 O33 76.0(3) . . ? 
O21 Mn3 O33 87.3(3) . . ? 
O2 Mn3 O33 78.6(3) . . ? 
O18 Mn3 O33 163.3(3) . . ? 
O38 Mn3 Mn7 138.6(2) . . ? 
O3 Mn3 Mn7 36.9(2) . . ? 
O21 Mn3 Mn7 84.8(3) . . ? 
O2 Mn3 Mn7 84.2(2) . . ? 
O18 Mn3 Mn7 124.1(2) . . ? 
O33 Mn3 Mn7 39.22(19) . . ? 
O38 Mn3 Mn5 29.2(2) . . ? 
O3 Mn3 Mn5 155.8(2) . . ? 
O21 Mn3 Mn5 75.9(3) . . ? 
O2 Mn3 Mn5 111.4(2) . . ? 
O18 Mn3 Mn5 75.1(2) . . ? 
O33 Mn3 Mn5 121.0(2) . . ? 
Mn7 Mn3 Mn5 153.85(7) . . ? 
O38 Mn3 Mn8 92.2(2) . . ? 
O3 Mn3 Mn8 82.9(2) . . ? 
O21 Mn3 Mn8 130.3(3) . . ? 
O2 Mn3 Mn8 35.6(2) . . ? 
O18 Mn3 Mn8 135.2(3) . . ? 
O33 Mn3 Mn8 43.2(2) . . ? 
Mn7 Mn3 Mn8 60.08(6) . . ? 
Mn5 Mn3 Mn8 121.31(7) . . ? 
O37 Mn4 O7 172.3(3) . . ? 
O37 Mn4 O23 93.4(3) . . ? 
O7 Mn4 O23 85.6(3) . . ? 
O37 Mn4 O9 91.9(3) . . ? 
O7 Mn4 O9 88.4(3) . . ? 
O23 Mn4 O9 172.1(3) . . ? 
O37 Mn4 O16 96.9(3) . . ? 
O7 Mn4 O16 90.8(3) . . ? 
O23 Mn4 O16 93.7(3) . . ? 
O9 Mn4 O16 91.6(3) . . ? 
O37 Mn4 O34 94.7(3) . . ? 
O7 Mn4 O34 77.7(3) . . ? 
O23 Mn4 O34 92.1(3) . . ? 
O9 Mn4 O34 81.5(3) . . ? 
O16 Mn4 O34 166.7(3) . . ? 
O37 Mn4 Mn11 133.3(3) . . ? 
O7 Mn4 Mn11 39.0(2) . . ? 
O23 Mn4 Mn11 87.2(2) . . ? 
O9 Mn4 Mn11 84.9(2) . . ? 
O16 Mn4 Mn11 129.7(2) . . ? 
O34 Mn4 Mn11 38.73(19) . . ? 
O37 Mn4 Mn5 91.4(2) . . ? 
O7 Mn4 Mn5 84.2(2) . . ? 
O23 Mn4 Mn5 136.8(2) . . ? 
O9 Mn4 Mn5 37.0(2) . . ? 
O16 Mn4 Mn5 128.3(2) . . ? 
O34 Mn4 Mn5 44.7(2) . . ? 
Mn11 Mn4 Mn5 59.61(6) . . ? 
O37 Mn4 Mn2 28.9(2) . . ? 
O7 Mn4 Mn2 154.9(2) . . ? 
O23 Mn4 Mn2 73.0(2) . . ? 
O9 Mn4 Mn2 114.0(2) . . ? 
O16 Mn4 Mn2 78.2(2) . . ? 
O34 Mn4 Mn2 115.0(2) . . ? 
Mn11 Mn4 Mn2 147.53(8) . . ? 
Mn5 Mn4 Mn2 120.32(7) . . ? 
O38 Mn5 O8 169.3(3) . . ? 
O38 Mn5 O9 92.0(3) . . ? 
O8 Mn5 O9 87.7(3) . . ? 
O38 Mn5 O22 93.2(3) . . ? 
O8 Mn5 O22 86.1(3) . . ? 
O9 Mn5 O22 171.8(3) . . ? 
O38 Mn5 O17 98.5(3) . . ? 
O8 Mn5 O17 92.2(3) . . ? 
O9 Mn5 O17 94.0(3) . . ? 
O22 Mn5 O17 91.6(4) . . ? 
O38 Mn5 O34 92.1(3) . . ? 
O8 Mn5 O34 77.2(3) . . ? 
O9 Mn5 O34 80.8(3) . . ? 
O22 Mn5 O34 92.6(3) . . ? 
O17 Mn5 O34 168.3(3) . . ? 
O38 Mn5 Mn11 130.9(2) . . ? 
O8 Mn5 Mn11 38.4(2) . . ? 
O9 Mn5 Mn11 86.2(2) . . ? 
O22 Mn5 Mn11 85.6(3) . . ? 
O17 Mn5 Mn11 130.6(2) . . ? 
O34 Mn5 Mn11 39.11(18) . . ? 
O38 Mn5 Mn4 89.9(2) . . ? 
O8 Mn5 Mn4 83.1(2) . . ? 
O9 Mn5 Mn4 38.6(2) . . ? 
O22 Mn5 Mn4 134.9(3) . . ? 
O17 Mn5 Mn4 132.3(3) . . ? 
O34 Mn5 Mn4 42.4(2) . . ? 
Mn11 Mn5 Mn4 59.70(6) . . ? 
O38 Mn5 Mn3 28.9(2) . . ? 
O8 Mn5 Mn3 157.0(2) . . ? 
O9 Mn5 Mn3 113.6(2) . . ? 
O22 Mn5 Mn3 73.5(2) . . ? 
O17 Mn5 Mn3 78.2(2) . . ? 
O34 Mn5 Mn3 113.4(2) . . ? 
Mn11 Mn5 Mn3 145.49(8) . . ? 
Mn4 Mn5 Mn3 118.78(7) . . ? 
O32 Mn6 O13 172.5(3) . . ? 
O32 Mn6 O31 80.9(3) . . ? 
O13 Mn6 O31 92.5(3) . . ? 
O32 Mn6 O12 98.3(3) . . ? 
O13 Mn6 O12 88.2(3) . . ? 
O31 Mn6 O12 179.0(3) . . ? 
O32 Mn6 O35 96.4(3) . . ? 
O13 Mn6 O35 81.6(3) . . ? 
O31 Mn6 O35 102.8(3) . . ? 
O12 Mn6 O35 76.7(3) . . ? 
O32 Mn6 O11 90.7(3) . . ? 
O13 Mn6 O11 92.4(3) . . ? 
O31 Mn6 O11 86.7(3) . . ? 
O12 Mn6 O11 93.9(3) . . ? 
O35 Mn6 O11 168.9(3) . . ? 
O32 Mn6 Mn9 45.0(2) . . ? 
O13 Mn6 Mn9 129.4(2) . . ? 
O31 Mn6 Mn9 38.2(2) . . ? 
O12 Mn6 Mn9 141.3(2) . . ? 
O35 Mn6 Mn9 113.3(2) . . ? 
O11 Mn6 Mn9 77.7(2) . . ? 
O32 Mn6 Mn1 97.6(2) . . ? 
O13 Mn6 Mn1 85.4(2) . . ? 
O31 Mn6 Mn1 142.2(2) . . ? 
O12 Mn6 Mn1 37.2(2) . . ? 
O35 Mn6 Mn1 39.49(19) . . ? 
O11 Mn6 Mn1 131.1(2) . . ? 
Mn9 Mn6 Mn1 137.48(8) . . ? 
O32 Mn6 Mn2 140.5(2) . . ? 
O13 Mn6 Mn2 36.3(2) . . ? 
O31 Mn6 Mn2 96.7(2) . . ? 
O12 Mn6 Mn2 83.6(2) . . ? 
O35 Mn6 Mn2 45.4(2) . . ? 
O11 Mn6 Mn2 128.6(2) . . ? 
Mn9 Mn6 Mn2 131.10(8) . . ? 
Mn1 Mn6 Mn2 60.81(6) . . ? 
O29 Mn7 O3 173.0(3) . . ? 
O29 Mn7 O33 95.0(3) . . ? 
O3 Mn7 O33 83.0(3) . . ? 
O29 Mn7 O28 92.3(3) . 5_665 ? 
O3 Mn7 O28 90.4(3) . 5_665 ? 
O33 Mn7 O28 170.4(4) . 5_665 ? 
O29 Mn7 O1 98.6(3) . . ? 
O3 Mn7 O1 87.7(3) . . ? 
O33 Mn7 O1 80.1(3) . . ? 
O28 Mn7 O1 92.7(3) 5_665 . ? 
O29 Mn7 O30 75.6(3) . . ? 
O3 Mn7 O30 97.9(3) . . ? 
O33 Mn7 O30 96.7(3) . . ? 
O28 Mn7 O30 91.1(3) 5_665 . ? 
O1 Mn7 O30 173.2(3) . . ? 
O29 Mn7 Mn9 40.2(2) . 5_665 ? 
O3 Mn7 Mn9 134.1(2) . 5_665 ? 
O33 Mn7 Mn9 107.7(2) . 5_665 ? 
O28 Mn7 Mn9 81.9(3) 5_665 5_665 ? 
O1 Mn7 Mn9 137.5(2) . 5_665 ? 
O30 Mn7 Mn9 37.8(2) . 5_665 ? 
O29 Mn7 Mn3 139.4(2) . . ? 
O3 Mn7 Mn3 37.7(2) . . ? 
O33 Mn7 Mn3 45.5(2) . . ? 
O28 Mn7 Mn3 128.0(3) 5_665 . ? 
O1 Mn7 Mn3 85.3(2) . . ? 
O30 Mn7 Mn3 96.8(2) . . ? 
Mn9 Mn7 Mn3 130.57(8) 5_665 . ? 
O29 Mn7 Mn8 98.0(2) . . ? 
O3 Mn7 Mn8 85.2(2) . . ? 
O33 Mn7 Mn8 43.8(2) . . ? 
O28 Mn7 Mn8 128.8(3) 5_665 . ? 
O1 Mn7 Mn8 36.3(2) . . ? 
O30 Mn7 Mn8 140.0(2) . . ? 
Mn9 Mn7 Mn8 133.58(8) 5_665 . ? 
Mn3 Mn7 Mn8 62.24(6) . . ? 
O36 Mn8 O1 174.9(3) . . ? 
O36 Mn8 O2 87.5(3) . . ? 
O1 Mn8 O2 87.9(3) . . ? 
O36 Mn8 O19 94.0(3) . . ? 
O1 Mn8 O19 90.1(3) . . ? 
O2 Mn8 O19 169.0(3) . . ? 
O36 Mn8 O26 93.6(3) . . ? 
O1 Mn8 O26 89.2(3) . . ? 
O2 Mn8 O26 97.2(3) . . ? 
O19 Mn8 O26 93.6(3) . . ? 
O36 Mn8 O33 99.0(3) . . ? 
O1 Mn8 O33 77.9(3) . . ? 
O2 Mn8 O33 78.8(3) . . ? 
O19 Mn8 O33 90.2(3) . . ? 
O26 Mn8 O33 166.5(3) . . ? 
O36 Mn8 Mn7 136.7(2) . . ? 
O1 Mn8 Mn7 40.1(2) . . ? 
O2 Mn8 Mn7 82.3(2) . . ? 
O19 Mn8 Mn7 89.2(2) . . ? 
O26 Mn8 Mn7 129.3(2) . . ? 
O33 Mn8 Mn7 37.77(19) . . ? 
O36 Mn8 Mn3 90.9(2) . . ? 
O1 Mn8 Mn3 84.0(2) . . ? 
O2 Mn8 Mn3 36.0(2) . . ? 
O19 Mn8 Mn3 133.1(3) . . ? 
O26 Mn8 Mn3 132.6(3) . . ? 
O33 Mn8 Mn3 43.0(2) . . ? 
Mn7 Mn8 Mn3 57.68(5) . . ? 
O30 Mn9 O31 171.3(3) 5_665 . ? 
O30 Mn9 O29 80.7(3) 5_665 5_665 ? 
O31 Mn9 O29 93.7(3) . 5_665 ? 
O30 Mn9 O10 94.1(3) 5_665 . ? 
O31 Mn9 O10 92.3(3) . . ? 
O29 Mn9 O10 171.2(3) 5_665 . ? 
O30 Mn9 O32 97.1(3) 5_665 . ? 
O31 Mn9 O32 76.9(3) . . ? 
O29 Mn9 O32 96.8(3) 5_665 . ? 
O10 Mn9 O32 90.8(3) . . ? 
O30 Mn9 O27 90.7(3) 5_665 . ? 
O31 Mn9 O27 95.7(3) . . ? 
O29 Mn9 O27 87.7(3) 5_665 . ? 
O10 Mn9 O27 85.4(3) . . ? 
O32 Mn9 O27 171.6(3) . . ? 
O30 Mn9 Mn6 134.9(3) 5_665 . ? 
O31 Mn9 Mn6 40.5(2) . . ? 
O29 Mn9 Mn6 106.5(2) 5_665 . ? 
O10 Mn9 Mn6 82.2(2) . . ? 
O32 Mn9 Mn6 38.5(2) . . ? 
O27 Mn9 Mn6 133.3(2) . . ? 
O30 Mn9 Mn7 45.0(2) 5_665 5_665 ? 
O31 Mn9 Mn7 130.9(2) . 5_665 ? 
O29 Mn9 Mn7 38.2(2) 5_665 5_665 ? 
O10 Mn9 Mn7 134.5(2) . 5_665 ? 
O32 Mn9 Mn7 110.2(2) . 5_665 ? 
O27 Mn9 Mn7 77.6(2) . 5_665 ? 
Mn6 Mn9 Mn7 138.50(8) . 5_665 ? 
O36 Mn10 O37 103.1(3) . . ? 
O36 Mn10 O38 105.7(3) . . ? 
O37 Mn10 O38 99.9(3) . . ? 
O36 Mn10 N1 114.5(3) . . ? 
O37 Mn10 N1 121.5(3) . . ? 
O38 Mn10 N1 110.2(3) . . ? 
O6 Mn11 O4 93.3(4) . . ? 
O6 Mn11 O5 93.0(4) . . ? 
O4 Mn11 O5 92.6(4) . . ? 
O6 Mn11 O34 171.1(4) . . ? 
O4 Mn11 O34 91.4(3) . . ? 
O5 Mn11 O34 94.3(3) . . ? 
O6 Mn11 O8 94.0(3) . . ? 
O4 Mn11 O8 172.4(3) . . ? 
O5 Mn11 O8 89.1(3) . . ? 
O34 Mn11 O8 81.2(3) . . ? 
O6 Mn11 O7 93.5(3) . . ? 
O4 Mn11 O7 92.4(3) . . ? 
O5 Mn11 O7 171.5(3) . . ? 
O34 Mn11 O7 78.7(3) . . ? 
O8 Mn11 O7 85.0(3) . . ? 
O6 Mn11 Mn5 130.3(3) . . ? 
O4 Mn11 Mn5 136.3(3) . . ? 
O5 Mn11 Mn5 88.3(3) . . ? 
O34 Mn11 Mn5 45.1(2) . . ? 
O8 Mn11 Mn5 36.3(2) . . ? 
O7 Mn11 Mn5 83.4(2) . . ? 
O6 Mn11 Mn4 129.9(3) . . ? 
O4 Mn11 Mn4 91.1(3) . . ? 
O5 Mn11 Mn4 136.6(3) . . ? 
O34 Mn11 Mn4 42.3(2) . . ? 
O8 Mn11 Mn4 82.6(2) . . ? 
O7 Mn11 Mn4 36.4(2) . . ? 
Mn5 Mn11 Mn4 60.69(6) . . ? 
C50 N1 C48 104.0(10) . . ? 
C50 N1 Mn10 127.9(9) . . ? 
C48 N1 Mn10 126.1(8) . . ? 
C50 N2 C49 106.4(11) . . ? 
C4 O1 Mn8 118.7(7) . . ? 
C4 O1 Mn7 115.4(6) . . ? 
Mn8 O1 Mn7 103.6(3) . . ? 
C6 O2 Mn8 118.0(7) . . ? 
C6 O2 Mn3 115.3(6) . . ? 
Mn8 O2 Mn3 108.5(4) . . ? 
C5 O3 Mn7 121.9(7) . . ? 
C5 O3 Mn3 116.2(7) . . ? 
Mn7 O3 Mn3 105.4(3) . . ? 
C10 O4 Mn11 120.0(7) . . ? 
C11 O5 Mn11 119.6(9) . . ? 
C12 O6 Mn11 116.9(8) . . ? 
C16 O7 Mn4 119.2(7) . . ? 
C16 O7 Mn11 117.5(7) . . ? 
Mn4 O7 Mn11 104.5(3) . . ? 
C17 O8 Mn5 119.7(7) . . ? 
C17 O8 Mn11 117.8(7) . . ? 
Mn5 O8 Mn11 105.3(3) . . ? 
C18 O9 Mn5 116.9(7) . . ? 
C18 O9 Mn4 117.0(7) . . ? 
Mn5 O9 Mn4 104.4(3) . . ? 
C19 O10 Mn9 127.5(8) . . ? 
C19 O11 Mn6 124.3(8) . . ? 
C24 O12 Mn1 121.3(7) . . ? 
C24 O12 Mn6 116.9(7) . . ? 
Mn1 O12 Mn6 105.0(3) . . ? 
C25 O13 Mn6 115.7(7) . . ? 
C25 O13 Mn2 118.8(6) . . ? 
Mn6 O13 Mn2 108.6(4) . . ? 
C26 O14 Mn2 118.4(7) . . ? 
C26 O14 Mn1 116.9(7) . . ? 
Mn2 O14 Mn1 101.8(3) . . ? 
C27 O15 Mn2 129.0(9) . . ? 
C27 O16 Mn4 127.4(8) . . ? 
C29 O17 Mn5 124.7(9) . . ? 
C29 O18 Mn3 132.5(8) . . ? 
C31 O19 Mn8 132.2(9) . . ? 
C31 O20 Mn1 131.9(8) . . ? 
C33 O21 Mn3 130.3(9) . . ? 
C33 O22 Mn5 133.2(8) . . ? 
C35 O23 Mn4 128.3(8) . . ? 
C35 O24 Mn2 126.8(8) . . ? 
C37 O25 Mn1 126.9(8) . . ? 
C37 O26 Mn8 132.5(8) . . ? 
C39 O27 Mn9 125.2(8) . . ? 
C39 O28 Mn7 129.5(9) . 5_665 ? 
C41 O29 Mn7 119.5(7) . . ? 
C41 O29 Mn9 121.8(7) . 5_665 ? 
Mn7 O29 Mn9 101.6(3) . 5_665 ? 
C42 O30 Mn9 121.1(7) . 5_665 ? 
C42 O30 Mn7 123.2(7) . . ? 
Mn9 O30 Mn7 97.2(3) 5_665 . ? 
C43 O31 Mn9 121.1(7) . . ? 
C43 O31 Mn6 122.5(7) . . ? 
Mn9 O31 Mn6 101.3(3) . . ? 
C44 O32 Mn6 121.4(7) . . ? 
C44 O32 Mn9 121.3(6) . . ? 
Mn6 O32 Mn9 96.5(3) . . ? 
C45 O33 Mn7 122.1(7) . . ? 
C45 O33 Mn3 121.3(7) . . ? 
Mn7 O33 Mn3 95.3(3) . . ? 
C45 O33 Mn8 119.6(7) . . ? 
Mn7 O33 Mn8 98.4(3) . . ? 
Mn3 O33 Mn8 93.8(3) . . ? 
C46 O34 Mn11 119.6(6) . . ? 
C46 O34 Mn4 122.0(6) . . ? 
Mn11 O34 Mn4 99.0(3) . . ? 
C46 O34 Mn5 121.3(7) . . ? 
Mn11 O34 Mn5 95.8(3) . . ? 
Mn4 O34 Mn5 92.9(3) . . ? 
C47 O35 Mn1 121.6(6) . . ? 
C47 O35 Mn6 120.4(6) . . ? 
Mn1 O35 Mn6 98.5(3) . . ? 
C47 O35 Mn2 121.3(6) . . ? 
Mn1 O35 Mn2 96.5(3) . . ? 
Mn6 O35 Mn2 92.1(3) . . ? 
Mn1 O36 Mn8 122.8(4) . . ? 
Mn1 O36 Mn10 114.6(4) . . ? 
Mn8 O36 Mn10 114.2(3) . . ? 
Mn4 O37 Mn2 122.4(4) . . ? 
Mn4 O37 Mn10 117.2(3) . . ? 
Mn2 O37 Mn10 113.9(3) . . ? 
Mn3 O38 Mn5 121.9(4) . . ? 
Mn3 O38 Mn10 113.2(3) . . ? 
Mn5 O38 Mn10 116.9(4) . . ? 
C51 O39 H39 109.5 . . ? 
  
loop_ 
 _geom_torsion_atom_site_label_1 
 _geom_torsion_atom_site_label_2 
 _geom_torsion_atom_site_label_3 
 _geom_torsion_atom_site_label_4 
 _geom_torsion 
 _geom_torsion_site_symmetry_1 
 _geom_torsion_site_symmetry_2 
 _geom_torsion_site_symmetry_3 
 _geom_torsion_site_symmetry_4 
 _geom_torsion_publ_flag 
C1 C2 C3 C6 -61.7(16) . . . . ? 
C1 C2 C3 C4 178.9(12) . . . . ? 
C1 C2 C3 C5 59.9(16) . . . . ? 
C2 C3 C4 O1 177.8(10) . . . . ? 
C6 C3 C4 O1 58.8(14) . . . . ? 
C5 C3 C4 O1 -64.1(13) . . . . ? 
C2 C3 C5 O3 177.0(10) . . . . ? 
C6 C3 C5 O3 -62.0(13) . . . . ? 
C4 C3 C5 O3 60.8(13) . . . . ? 
C2 C3 C6 O2 -176.4(10) . . . . ? 
C4 C3 C6 O2 -59.9(13) . . . . ? 
C5 C3 C6 O2 62.9(13) . . . . ? 
C7 C8 C9 C11 168.3(13) . . . . ? 
C7 C8 C9 C10 48.1(19) . . . . ? 
C7 C8 C9 C12 -72.6(18) . . . . ? 
C8 C9 C10 O4 168.0(12) . . . . ? 
C11 C9 C10 O4 49.5(16) . . . . ? 
C12 C9 C10 O4 -67.5(15) . . . . ? 
C8 C9 C11 O5 171.2(12) . . . . ? 
C10 C9 C11 O5 -68.3(16) . . . . ? 
C12 C9 C11 O5 48.3(16) . . . . ? 
C8 C9 C12 O6 170.4(13) . . . . ? 
C11 C9 C12 O6 -70.6(16) . . . . ? 
C10 C9 C12 O6 47.8(16) . . . . ? 
C13 C14 C15 C18 179.3(11) . . . . ? 
C13 C14 C15 C17 61.0(15) . . . . ? 
C13 C14 C15 C16 -57.0(14) . . . . ? 
C18 C15 C16 O7 -56.8(14) . . . . ? 
C17 C15 C16 O7 63.8(12) . . . . ? 
C14 C15 C16 O7 -175.8(9) . . . . ? 
C18 C15 C17 O8 59.7(13) . . . . ? 
C14 C15 C17 O8 176.4(9) . . . . ? 
C16 C15 C17 O8 -64.2(12) . . . . ? 
C17 C15 C18 O9 -62.6(13) . . . . ? 
C14 C15 C18 O9 177.8(10) . . . . ? 
C16 C15 C18 O9 57.0(14) . . . . ? 
C21 C22 C23 C24 -65.1(14) . . . . ? 
C21 C22 C23 C25 59.9(15) . . . . ? 
C21 C22 C23 C26 175.8(11) . . . . ? 
C25 C23 C24 O12 58.4(13) . . . . ? 
C22 C23 C24 O12 -179.2(9) . . . . ? 
C26 C23 C24 O12 -64.3(12) . . . . ? 
C24 C23 C25 O13 -60.2(13) . . . . ? 
C22 C23 C25 O13 176.7(9) . . . . ? 
C26 C23 C25 O13 63.7(13) . . . . ? 
C24 C23 C26 O14 61.8(12) . . . . ? 
C25 C23 C26 O14 -63.5(13) . . . . ? 
C22 C23 C26 O14 -179.5(10) . . . . ? 
N1 C48 C49 N2 0.2(16) . . . . ? 
O36 Mn1 Mn2 O37 -5.4(3) . . . . ? 
O12 Mn1 Mn2 O37 177.1(3) . . . . ? 
O25 Mn1 Mn2 O37 90.7(4) . . . . ? 
O35 Mn1 Mn2 O37 -100.4(4) . . . . ? 
O20 Mn1 Mn2 O37 -100.9(4) . . . . ? 
O14 Mn1 Mn2 O37 85.5(4) . . . . ? 
Mn6 Mn1 Mn2 O37 -151.2(2) . . . . ? 
O36 Mn1 Mn2 O14 -91.0(4) . . . . ? 
O12 Mn1 Mn2 O14 91.6(4) . . . . ? 
O25 Mn1 Mn2 O14 5.1(4) . . . . ? 
O35 Mn1 Mn2 O14 174.1(4) . . . . ? 
O20 Mn1 Mn2 O14 173.6(5) . . . . ? 
Mn6 Mn1 Mn2 O14 123.3(3) . . . . ? 
O36 Mn1 Mn2 O13 173.2(3) . . . . ? 
O12 Mn1 Mn2 O13 -4.3(3) . . . . ? 
O25 Mn1 Mn2 O13 -90.7(4) . . . . ? 
O35 Mn1 Mn2 O13 78.3(4) . . . . ? 
O20 Mn1 Mn2 O13 77.7(4) . . . . ? 
O14 Mn1 Mn2 O13 -95.8(4) . . . . ? 
Mn6 Mn1 Mn2 O13 27.5(2) . . . . ? 
O36 Mn1 Mn2 O24 89.2(4) . . . . ? 
O12 Mn1 Mn2 O24 -88.2(4) . . . . ? 
O25 Mn1 Mn2 O24 -174.6(4) . . . . ? 
O35 Mn1 Mn2 O24 -5.7(4) . . . . ? 
O20 Mn1 Mn2 O24 -6.2(4) . . . . ? 
O14 Mn1 Mn2 O24 -179.8(4) . . . . ? 
Mn6 Mn1 Mn2 O24 -56.5(3) . . . . ? 
O36 Mn1 Mn2 O15 -106.8(4) . . . . ? 
O12 Mn1 Mn2 O15 75.7(4) . . . . ? 
O25 Mn1 Mn2 O15 -10.7(4) . . . . ? 
O35 Mn1 Mn2 O15 158.2(4) . . . . ? 
O20 Mn1 Mn2 O15 157.7(4) . . . . ? 
O14 Mn1 Mn2 O15 -15.9(4) . . . . ? 
Mn6 Mn1 Mn2 O15 107.4(3) . . . . ? 
O36 Mn1 Mn2 O35 94.9(4) . . . . ? 
O12 Mn1 Mn2 O35 -82.5(4) . . . . ? 
O25 Mn1 Mn2 O35 -169.0(4) . . . . ? 
O20 Mn1 Mn2 O35 -0.5(4) . . . . ? 
O14 Mn1 Mn2 O35 -174.1(4) . . . . ? 
Mn6 Mn1 Mn2 O35 -50.8(3) . . . . ? 
O36 Mn1 Mn2 Mn6 145.7(2) . . . . ? 
O12 Mn1 Mn2 Mn6 -31.7(2) . . . . ? 
O25 Mn1 Mn2 Mn6 -118.2(3) . . . . ? 
O35 Mn1 Mn2 Mn6 50.8(3) . . . . ? 
O20 Mn1 Mn2 Mn6 50.3(3) . . . . ? 
O14 Mn1 Mn2 Mn6 -123.3(3) . . . . ? 
O36 Mn1 Mn2 Mn4 -7.9(2) . . . . ? 
O12 Mn1 Mn2 Mn4 174.7(2) . . . . ? 
O25 Mn1 Mn2 Mn4 88.2(3) . . . . ? 
O35 Mn1 Mn2 Mn4 -102.8(3) . . . . ? 
O20 Mn1 Mn2 Mn4 -103.3(3) . . . . ? 
O14 Mn1 Mn2 Mn4 83.1(3) . . . . ? 
Mn6 Mn1 Mn2 Mn4 -153.60(9) . . . . ? 
O14 Mn2 Mn4 O37 49.3(5) . . . . ? 
O13 Mn2 Mn4 O37 -177.4(7) . . . . ? 
O24 Mn2 Mn4 O37 -117.8(5) . . . . ? 
O15 Mn2 Mn4 O37 139.8(5) . . . . ? 
O35 Mn2 Mn4 O37 -41.4(5) . . . . ? 
Mn6 Mn2 Mn4 O37 -81.7(5) . . . . ? 
Mn1 Mn2 Mn4 O37 5.1(5) . . . . ? 
O37 Mn2 Mn4 O7 165.2(7) . . . . ? 
O14 Mn2 Mn4 O7 -145.5(6) . . . . ? 
O13 Mn2 Mn4 O7 -12.2(8) . . . . ? 
O24 Mn2 Mn4 O7 47.3(6) . . . . ? 
O15 Mn2 Mn4 O7 -55.1(6) . . . . ? 
O35 Mn2 Mn4 O7 123.8(6) . . . . ? 
Mn6 Mn2 Mn4 O7 83.5(6) . . . . ? 
Mn1 Mn2 Mn4 O7 170.3(6) . . . . ? 
O37 Mn2 Mn4 O23 133.0(5) . . . . ? 
O14 Mn2 Mn4 O23 -177.6(4) . . . . ? 
O13 Mn2 Mn4 O23 -44.3(6) . . . . ? 
O24 Mn2 Mn4 O23 15.2(3) . . . . ? 
O15 Mn2 Mn4 O23 -87.2(3) . . . . ? 
O35 Mn2 Mn4 O23 91.7(3) . . . . ? 
Mn6 Mn2 Mn4 O23 51.4(3) . . . . ? 
Mn1 Mn2 Mn4 O23 138.1(3) . . . . ? 
O37 Mn2 Mn4 O9 -42.9(5) . . . . ? 
O14 Mn2 Mn4 O9 6.4(4) . . . . ? 
O13 Mn2 Mn4 O9 139.7(6) . . . . ? 
O24 Mn2 Mn4 O9 -160.8(3) . . . . ? 
O15 Mn2 Mn4 O9 96.8(3) . . . . ? 
O35 Mn2 Mn4 O9 -84.3(3) . . . . ? 
Mn6 Mn2 Mn4 O9 -124.6(3) . . . . ? 
Mn1 Mn2 Mn4 O9 -37.8(3) . . . . ? 
O37 Mn2 Mn4 O16 -129.3(5) . . . . ? 
O14 Mn2 Mn4 O16 -80.0(3) . . . . ? 
O13 Mn2 Mn4 O16 53.3(6) . . . . ? 
O24 Mn2 Mn4 O16 112.8(3) . . . . ? 
O15 Mn2 Mn4 O16 10.4(3) . . . . ? 
O35 Mn2 Mn4 O16 -170.7(3) . . . . ? 
Mn6 Mn2 Mn4 O16 149.0(3) . . . . ? 
Mn1 Mn2 Mn4 O16 -124.3(3) . . . . ? 
O37 Mn2 Mn4 O34 48.8(5) . . . . ? 
O14 Mn2 Mn4 O34 98.1(3) . . . . ? 
O13 Mn2 Mn4 O34 -128.6(6) . . . . ? 
O24 Mn2 Mn4 O34 -69.0(3) . . . . ? 
O15 Mn2 Mn4 O34 -171.4(3) . . . . ? 
O35 Mn2 Mn4 O34 7.4(3) . . . . ? 
Mn6 Mn2 Mn4 O34 -32.9(3) . . . . ? 
Mn1 Mn2 Mn4 O34 53.9(2) . . . . ? 
O37 Mn2 Mn4 Mn11 78.3(5) . . . . ? 
O14 Mn2 Mn4 Mn11 127.7(3) . . . . ? 
O13 Mn2 Mn4 Mn11 -99.0(6) . . . . ? 
O24 Mn2 Mn4 Mn11 -39.5(3) . . . . ? 
O15 Mn2 Mn4 Mn11 -141.9(3) . . . . ? 
O35 Mn2 Mn4 Mn11 36.9(3) . . . . ? 
Mn6 Mn2 Mn4 Mn11 -3.3(3) . . . . ? 
Mn1 Mn2 Mn4 Mn11 83.41(15) . . . . ? 
O37 Mn2 Mn4 Mn5 -1.7(5) . . . . ? 
O14 Mn2 Mn4 Mn5 47.6(3) . . . . ? 
O13 Mn2 Mn4 Mn5 -179.1(5) . . . . ? 
O24 Mn2 Mn4 Mn5 -119.6(2) . . . . ? 
O15 Mn2 Mn4 Mn5 138.0(2) . . . . ? 
O35 Mn2 Mn4 Mn5 -43.1(2) . . . . ? 
Mn6 Mn2 Mn4 Mn5 -83.4(2) . . . . ? 
Mn1 Mn2 Mn4 Mn5 3.35(12) . . . . ? 
O37 Mn4 Mn5 O38 2.0(3) . . . . ? 
O7 Mn4 Mn5 O38 -171.6(3) . . . . ? 
O23 Mn4 Mn5 O38 -94.5(4) . . . . ? 
O9 Mn4 Mn5 O38 93.3(4) . . . . ? 
O16 Mn4 Mn5 O38 102.0(4) . . . . ? 
O34 Mn4 Mn5 O38 -93.2(3) . . . . ? 
Mn11 Mn4 Mn5 O38 -139.4(2) . . . . ? 
Mn2 Mn4 Mn5 O38 2.8(2) . . . . ? 
O37 Mn4 Mn5 O8 173.8(3) . . . . ? 
O7 Mn4 Mn5 O8 0.2(3) . . . . ? 
O23 Mn4 Mn5 O8 77.4(4) . . . . ? 
O9 Mn4 Mn5 O8 -94.9(4) . . . . ? 
O16 Mn4 Mn5 O8 -86.2(4) . . . . ? 
O34 Mn4 Mn5 O8 78.6(3) . . . . ? 
Mn11 Mn4 Mn5 O8 32.5(2) . . . . ? 
Mn2 Mn4 Mn5 O8 174.6(2) . . . . ? 
O37 Mn4 Mn5 O9 -91.3(4) . . . . ? 
O7 Mn4 Mn5 O9 95.1(4) . . . . ? 
O23 Mn4 Mn5 O9 172.3(5) . . . . ? 
O16 Mn4 Mn5 O9 8.7(4) . . . . ? 
O34 Mn4 Mn5 O9 173.5(4) . . . . ? 
Mn11 Mn4 Mn5 O9 127.4(3) . . . . ? 
Mn2 Mn4 Mn5 O9 -90.4(3) . . . . ? 
O37 Mn4 Mn5 O22 96.4(4) . . . . ? 
O7 Mn4 Mn5 O22 -77.2(4) . . . . ? 
O23 Mn4 Mn5 O22 0.0(5) . . . . ? 
O9 Mn4 Mn5 O22 -172.3(5) . . . . ? 
O16 Mn4 Mn5 O22 -163.6(5) . . . . ? 
O34 Mn4 Mn5 O22 1.2(4) . . . . ? 
Mn11 Mn4 Mn5 O22 -44.9(4) . . . . ? 
Mn2 Mn4 Mn5 O22 97.3(4) . . . . ? 
O37 Mn4 Mn5 O17 -99.5(4) . . . . ? 
O7 Mn4 Mn5 O17 86.8(4) . . . . ? 
O23 Mn4 Mn5 O17 164.0(4) . . . . ? 
O9 Mn4 Mn5 O17 -8.2(4) . . . . ? 
O16 Mn4 Mn5 O17 0.4(4) . . . . ? 
O34 Mn4 Mn5 O17 165.2(4) . . . . ? 
Mn11 Mn4 Mn5 O17 119.1(3) . . . . ? 
Mn2 Mn4 Mn5 O17 -98.7(3) . . . . ? 
O37 Mn4 Mn5 O34 95.2(4) . . . . ? 
O7 Mn4 Mn5 O34 -78.4(3) . . . . ? 
O23 Mn4 Mn5 O34 -1.2(4) . . . . ? 
O9 Mn4 Mn5 O34 -173.5(4) . . . . ? 
O16 Mn4 Mn5 O34 -164.8(4) . . . . ? 
Mn11 Mn4 Mn5 O34 -46.1(3) . . . . ? 
Mn2 Mn4 Mn5 O34 96.1(3) . . . . ? 
O37 Mn4 Mn5 Mn11 141.4(2) . . . . ? 
O7 Mn4 Mn5 Mn11 -32.3(2) . . . . ? 
O23 Mn4 Mn5 Mn11 44.9(3) . . . . ? 
O9 Mn4 Mn5 Mn11 -127.4(3) . . . . ? 
O16 Mn4 Mn5 Mn11 -118.7(3) . . . . ? 
O34 Mn4 Mn5 Mn11 46.1(3) . . . . ? 
Mn2 Mn4 Mn5 Mn11 142.19(9) . . . . ? 
O37 Mn4 Mn5 Mn3 1.2(2) . . . . ? 
O7 Mn4 Mn5 Mn3 -172.4(2) . . . . ? 
O23 Mn4 Mn5 Mn3 -95.3(3) . . . . ? 
O9 Mn4 Mn5 Mn3 92.5(3) . . . . ? 
O16 Mn4 Mn5 Mn3 101.1(3) . . . . ? 
O34 Mn4 Mn5 Mn3 -94.0(3) . . . . ? 
Mn11 Mn4 Mn5 Mn3 -140.17(9) . . . . ? 
Mn2 Mn4 Mn5 Mn3 2.02(11) . . . . ? 
O3 Mn3 Mn5 O38 177.1(7) . . . . ? 
O21 Mn3 Mn5 O38 124.7(5) . . . . ? 
O2 Mn3 Mn5 O38 -42.5(5) . . . . ? 
O18 Mn3 Mn5 O38 -138.4(5) . . . . ? 
O33 Mn3 Mn5 O38 46.7(5) . . . . ? 
Mn7 Mn3 Mn5 O38 80.9(5) . . . . ? 
Mn8 Mn3 Mn5 O38 -4.2(5) . . . . ? 
O38 Mn3 Mn5 O8 -159.2(7) . . . . ? 
O3 Mn3 Mn5 O8 17.8(8) . . . . ? 
O21 Mn3 Mn5 O8 -34.5(6) . . . . ? 
O2 Mn3 Mn5 O8 158.2(6) . . . . ? 
O18 Mn3 Mn5 O8 62.3(6) . . . . ? 
O33 Mn3 Mn5 O8 -112.5(6) . . . . ? 
Mn7 Mn3 Mn5 O8 -78.4(6) . . . . ? 
Mn8 Mn3 Mn5 O8 -163.4(6) . . . . ? 
O38 Mn3 Mn5 O9 44.6(5) . . . . ? 
O3 Mn3 Mn5 O9 -138.4(6) . . . . ? 
O21 Mn3 Mn5 O9 169.3(4) . . . . ? 
O2 Mn3 Mn5 O9 2.0(3) . . . . ? 
O18 Mn3 Mn5 O9 -93.9(4) . . . . ? 
O33 Mn3 Mn5 O9 91.3(3) . . . . ? 
Mn7 Mn3 Mn5 O9 125.5(3) . . . . ? 
Mn8 Mn3 Mn5 O9 40.4(3) . . . . ? 
O38 Mn3 Mn5 O22 -131.0(5) . . . . ? 
O3 Mn3 Mn5 O22 46.0(6) . . . . ? 
O21 Mn3 Mn5 O22 -6.3(4) . . . . ? 
O2 Mn3 Mn5 O22 -173.6(4) . . . . ? 
O18 Mn3 Mn5 O22 90.5(4) . . . . ? 
O33 Mn3 Mn5 O22 -84.3(4) . . . . ? 
Mn7 Mn3 Mn5 O22 -50.1(3) . . . . ? 
Mn8 Mn3 Mn5 O22 -135.2(3) . . . . ? 
O38 Mn3 Mn5 O17 133.8(5) . . . . ? 
O3 Mn3 Mn5 O17 -49.2(6) . . . . ? 
O21 Mn3 Mn5 O17 -101.5(4) . . . . ? 
O2 Mn3 Mn5 O17 91.3(4) . . . . ? 
O18 Mn3 Mn5 O17 -4.7(4) . . . . ? 
O33 Mn3 Mn5 O17 -179.5(4) . . . . ? 
Mn7 Mn3 Mn5 O17 -145.3(3) . . . . ? 
Mn8 Mn3 Mn5 O17 129.6(3) . . . . ? 
O38 Mn3 Mn5 O34 -45.4(5) . . . . ? 
O3 Mn3 Mn5 O34 131.6(6) . . . . ? 
O21 Mn3 Mn5 O34 79.3(3) . . . . ? 
O2 Mn3 Mn5 O34 -87.9(3) . . . . ? 
O18 Mn3 Mn5 O34 176.1(3) . . . . ? 
O33 Mn3 Mn5 O34 1.3(3) . . . . ? 
Mn7 Mn3 Mn5 O34 35.5(3) . . . . ? 
Mn8 Mn3 Mn5 O34 -49.6(2) . . . . ? 
O38 Mn3 Mn5 Mn11 -75.8(5) . . . . ? 
O3 Mn3 Mn5 Mn11 101.3(6) . . . . ? 
O21 Mn3 Mn5 Mn11 49.0(3) . . . . ? 
O2 Mn3 Mn5 Mn11 -118.3(3) . . . . ? 
O18 Mn3 Mn5 Mn11 145.8(3) . . . . ? 
O33 Mn3 Mn5 Mn11 -29.0(3) . . . . ? 
Mn7 Mn3 Mn5 Mn11 5.1(3) . . . . ? 
Mn8 Mn3 Mn5 Mn11 -79.97(15) . . . . ? 
O38 Mn3 Mn5 Mn4 1.7(5) . . . . ? 
O3 Mn3 Mn5 Mn4 178.7(6) . . . . ? 
O21 Mn3 Mn5 Mn4 126.4(3) . . . . ? 
O2 Mn3 Mn5 Mn4 -40.9(3) . . . . ? 
O18 Mn3 Mn5 Mn4 -136.8(3) . . . . ? 
O33 Mn3 Mn5 Mn4 48.4(3) . . . . ? 
Mn7 Mn3 Mn5 Mn4 82.58(18) . . . . ? 
Mn8 Mn3 Mn5 Mn4 -2.50(11) . . . . ? 
O36 Mn1 Mn6 O32 92.1(4) . . . . ? 
O12 Mn1 Mn6 O32 -93.7(4) . . . . ? 
O25 Mn1 Mn6 O32 -100.4(4) . . . . ? 
O35 Mn1 Mn6 O32 90.8(4) . . . . ? 
O20 Mn1 Mn6 O32 -5.3(3) . . . . ? 
O14 Mn1 Mn6 O32 174.9(3) . . . . ? 
Mn2 Mn1 Mn6 O32 144.8(2) . . . . ? 
O36 Mn1 Mn6 O13 -81.0(4) . . . . ? 
O12 Mn1 Mn6 O13 93.2(4) . . . . ? 
O25 Mn1 Mn6 O13 86.5(4) . . . . ? 
O35 Mn1 Mn6 O13 -82.4(4) . . . . ? 
O20 Mn1 Mn6 O13 -178.4(3) . . . . ? 
O14 Mn1 Mn6 O13 1.8(3) . . . . ? 
Mn2 Mn1 Mn6 O13 -28.3(2) . . . . ? 
O36 Mn1 Mn6 O31 7.1(5) . . . . ? 
O12 Mn1 Mn6 O31 -178.7(5) . . . . ? 
O25 Mn1 Mn6 O31 174.7(5) . . . . ? 
O35 Mn1 Mn6 O31 5.8(5) . . . . ? 
O20 Mn1 Mn6 O31 -90.2(4) . . . . ? 
O14 Mn1 Mn6 O31 89.9(4) . . . . ? 
Mn2 Mn1 Mn6 O31 59.8(4) . . . . ? 
O36 Mn1 Mn6 O12 -174.2(5) . . . . ? 
O25 Mn1 Mn6 O12 -6.7(5) . . . . ? 
O35 Mn1 Mn6 O12 -175.5(5) . . . . ? 
O20 Mn1 Mn6 O12 88.4(4) . . . . ? 
O14 Mn1 Mn6 O12 -91.4(4) . . . . ? 
Mn2 Mn1 Mn6 O12 -121.5(4) . . . . ? 
O36 Mn1 Mn6 O35 1.3(5) . . . . ? 
O12 Mn1 Mn6 O35 175.5(5) . . . . ? 
O25 Mn1 Mn6 O35 168.9(5) . . . . ? 
O20 Mn1 Mn6 O35 -96.0(4) . . . . ? 
O14 Mn1 Mn6 O35 84.2(4) . . . . ? 
Mn2 Mn1 Mn6 O35 54.1(3) . . . . ? 
O36 Mn1 Mn6 O11 -170.2(4) . . . . ? 
O12 Mn1 Mn6 O11 4.0(5) . . . . ? 
O25 Mn1 Mn6 O11 -2.7(4) . . . . ? 
O35 Mn1 Mn6 O11 -171.5(4) . . . . ? 
O20 Mn1 Mn6 O11 92.4(4) . . . . ? 
O14 Mn1 Mn6 O11 -87.4(4) . . . . ? 
Mn2 Mn1 Mn6 O11 -117.5(3) . . . . ? 
O36 Mn1 Mn6 Mn9 67.6(4) . . . . ? 
O12 Mn1 Mn6 Mn9 -118.2(4) . . . . ? 
O25 Mn1 Mn6 Mn9 -124.9(3) . . . . ? 
O35 Mn1 Mn6 Mn9 66.3(3) . . . . ? 
O20 Mn1 Mn6 Mn9 -29.8(2) . . . . ? 
O14 Mn1 Mn6 Mn9 150.4(2) . . . . ? 
Mn2 Mn1 Mn6 Mn9 120.33(12) . . . . ? 
O36 Mn1 Mn6 Mn2 -52.7(3) . . . . ? 
O12 Mn1 Mn6 Mn2 121.5(4) . . . . ? 
O25 Mn1 Mn6 Mn2 114.8(3) . . . . ? 
O35 Mn1 Mn6 Mn2 -54.1(3) . . . . ? 
O20 Mn1 Mn6 Mn2 -150.1(2) . . . . ? 
O14 Mn1 Mn6 Mn2 30.11(19) . . . . ? 
O37 Mn2 Mn6 O32 -13.1(5) . . . . ? 
O14 Mn2 Mn6 O32 -97.7(4) . . . . ? 
O13 Mn2 Mn6 O32 169.0(5) . . . . ? 
O24 Mn2 Mn6 O32 72.2(4) . . . . ? 
O15 Mn2 Mn6 O32 167.7(4) . . . . ? 
O35 Mn2 Mn6 O32 -17.6(4) . . . . ? 
Mn1 Mn2 Mn6 O32 -63.9(4) . . . . ? 
Mn4 Mn2 Mn6 O32 36.7(4) . . . . ? 
O37 Mn2 Mn6 O13 177.9(5) . . . . ? 
O14 Mn2 Mn6 O13 93.3(4) . . . . ? 
O24 Mn2 Mn6 O13 -96.8(4) . . . . ? 
O15 Mn2 Mn6 O13 -1.3(4) . . . . ? 
O35 Mn2 Mn6 O13 173.4(5) . . . . ? 
Mn1 Mn2 Mn6 O13 127.1(4) . . . . ? 
Mn4 Mn2 Mn6 O13 -132.3(4) . . . . ? 
O37 Mn2 Mn6 O31 -97.0(4) . . . . ? 
O14 Mn2 Mn6 O31 178.5(3) . . . . ? 
O13 Mn2 Mn6 O31 85.2(4) . . . . ? 
O24 Mn2 Mn6 O31 -11.6(3) . . . . ? 
O15 Mn2 Mn6 O31 83.9(3) . . . . ? 
O35 Mn2 Mn6 O31 -101.4(4) . . . . ? 
Mn1 Mn2 Mn6 O31 -147.7(2) . . . . ? 
Mn4 Mn2 Mn6 O31 -47.1(3) . . . . ? 
O37 Mn2 Mn6 O12 82.1(4) . . . . ? 
O14 Mn2 Mn6 O12 -2.5(3) . . . . ? 
O13 Mn2 Mn6 O12 -95.8(4) . . . . ? 
O24 Mn2 Mn6 O12 167.4(3) . . . . ? 
O15 Mn2 Mn6 O12 -97.1(3) . . . . ? 
O35 Mn2 Mn6 O12 77.6(3) . . . . ? 
Mn1 Mn2 Mn6 O12 31.3(2) . . . . ? 
Mn4 Mn2 Mn6 O12 131.9(3) . . . . ? 
O37 Mn2 Mn6 O35 4.4(4) . . . . ? 
O14 Mn2 Mn6 O35 -80.1(3) . . . . ? 
O13 Mn2 Mn6 O35 -173.4(5) . . . . ? 
O24 Mn2 Mn6 O35 89.8(4) . . . . ? 
O15 Mn2 Mn6 O35 -174.7(4) . . . . ? 
Mn1 Mn2 Mn6 O35 -46.3(3) . . . . ? 
Mn4 Mn2 Mn6 O35 54.3(3) . . . . ? 
O37 Mn2 Mn6 O11 172.0(5) . . . . ? 
O14 Mn2 Mn6 O11 87.4(4) . . . . ? 
O13 Mn2 Mn6 O11 -5.9(5) . . . . ? 
O24 Mn2 Mn6 O11 -102.7(4) . . . . ? 
O15 Mn2 Mn6 O11 -7.2(4) . . . . ? 
O35 Mn2 Mn6 O11 167.5(4) . . . . ? 
Mn1 Mn2 Mn6 O11 121.2(3) . . . . ? 
Mn4 Mn2 Mn6 O11 -138.2(3) . . . . ? 
O37 Mn2 Mn6 Mn9 -78.5(4) . . . . ? 
O14 Mn2 Mn6 Mn9 -163.1(2) . . . . ? 
O13 Mn2 Mn6 Mn9 103.6(4) . . . . ? 
O24 Mn2 Mn6 Mn9 6.8(3) . . . . ? 
O15 Mn2 Mn6 Mn9 102.3(3) . . . . ? 
O35 Mn2 Mn6 Mn9 -82.9(3) . . . . ? 
Mn1 Mn2 Mn6 Mn9 -129.27(11) . . . . ? 
Mn4 Mn2 Mn6 Mn9 -28.7(2) . . . . ? 
O37 Mn2 Mn6 Mn1 50.8(4) . . . . ? 
O14 Mn2 Mn6 Mn1 -33.8(2) . . . . ? 
O13 Mn2 Mn6 Mn1 -127.1(4) . . . . ? 
O24 Mn2 Mn6 Mn1 136.1(2) . . . . ? 
O15 Mn2 Mn6 Mn1 -128.4(3) . . . . ? 
O35 Mn2 Mn6 Mn1 46.3(3) . . . . ? 
Mn4 Mn2 Mn6 Mn1 100.6(2) . . . . ? 
O38 Mn3 Mn7 O29 14.0(5) . . . . ? 
O3 Mn3 Mn7 O29 -169.9(5) . . . . ? 
O21 Mn3 Mn7 O29 -75.1(5) . . . . ? 
O2 Mn3 Mn7 O29 96.0(4) . . . . ? 
O18 Mn3 Mn7 O29 -164.9(5) . . . . ? 
O33 Mn3 Mn7 O29 16.9(5) . . . . ? 
Mn5 Mn3 Mn7 O29 -32.7(4) . . . . ? 
Mn8 Mn3 Mn7 O29 68.2(4) . . . . ? 
O38 Mn3 Mn7 O3 -176.0(5) . . . . ? 
O21 Mn3 Mn7 O3 94.9(4) . . . . ? 
O2 Mn3 Mn7 O3 -94.1(4) . . . . ? 
O18 Mn3 Mn7 O3 5.0(5) . . . . ? 
O33 Mn3 Mn7 O3 -173.1(5) . . . . ? 
Mn5 Mn3 Mn7 O3 137.3(4) . . . . ? 
Mn8 Mn3 Mn7 O3 -121.9(4) . . . . ? 
O38 Mn3 Mn7 O33 -2.9(5) . . . . ? 
O3 Mn3 Mn7 O33 173.1(5) . . . . ? 
O21 Mn3 Mn7 O33 -92.0(4) . . . . ? 
O2 Mn3 Mn7 O33 79.1(4) . . . . ? 
O18 Mn3 Mn7 O33 178.1(4) . . . . ? 
Mn5 Mn3 Mn7 O33 -49.6(3) . . . . ? 
Mn8 Mn3 Mn7 O33 51.3(3) . . . . ? 
O38 Mn3 Mn7 O28 -173.4(5) . . . 5_665 ? 
O3 Mn3 Mn7 O28 2.7(5) . . . 5_665 ? 
O21 Mn3 Mn7 O28 97.5(4) . . . 5_665 ? 
O2 Mn3 Mn7 O28 -91.4(4) . . . 5_665 ? 
O18 Mn3 Mn7 O28 7.7(5) . . . 5_665 ? 
O33 Mn3 Mn7 O28 -170.5(4) . . . 5_665 ? 
Mn5 Mn3 Mn7 O28 139.9(3) . . . 5_665 ? 
Mn8 Mn3 Mn7 O28 -119.2(3) . . . 5_665 ? 
O38 Mn3 Mn7 O1 -83.6(4) . . . . ? 
O3 Mn3 Mn7 O1 92.4(4) . . . . ? 
O21 Mn3 Mn7 O1 -172.8(3) . . . . ? 
O2 Mn3 Mn7 O1 -1.7(3) . . . . ? 
O18 Mn3 Mn7 O1 97.4(4) . . . . ? 
O33 Mn3 Mn7 O1 -80.8(4) . . . . ? 
Mn5 Mn3 Mn7 O1 -130.3(3) . . . . ? 
Mn8 Mn3 Mn7 O1 -29.5(2) . . . . ? 
O38 Mn3 Mn7 O30 89.9(4) . . . . ? 
O3 Mn3 Mn7 O30 -94.1(4) . . . . ? 
O21 Mn3 Mn7 O30 0.7(3) . . . . ? 
O2 Mn3 Mn7 O30 171.8(3) . . . . ? 
O18 Mn3 Mn7 O30 -89.1(4) . . . . ? 
O33 Mn3 Mn7 O30 92.8(4) . . . . ? 
Mn5 Mn3 Mn7 O30 43.2(3) . . . . ? 
Mn8 Mn3 Mn7 O30 144.0(2) . . . . ? 
O38 Mn3 Mn7 Mn9 70.9(4) . . . 5_665 ? 
O3 Mn3 Mn7 Mn9 -113.1(4) . . . 5_665 ? 
O21 Mn3 Mn7 Mn9 -18.2(3) . . . 5_665 ? 
O2 Mn3 Mn7 Mn9 152.9(2) . . . 5_665 ? 
O18 Mn3 Mn7 Mn9 -108.1(3) . . . 5_665 ? 
O33 Mn3 Mn7 Mn9 73.8(3) . . . 5_665 ? 
Mn5 Mn3 Mn7 Mn9 24.2(2) . . . 5_665 ? 
Mn8 Mn3 Mn7 Mn9 125.09(10) . . . 5_665 ? 
O38 Mn3 Mn7 Mn8 -54.2(3) . . . . ? 
O3 Mn3 Mn7 Mn8 121.9(4) . . . . ? 
O21 Mn3 Mn7 Mn8 -143.3(3) . . . . ? 
O2 Mn3 Mn7 Mn8 27.8(2) . . . . ? 
O18 Mn3 Mn7 Mn8 126.8(3) . . . . ? 
O33 Mn3 Mn7 Mn8 -51.3(3) . . . . ? 
Mn5 Mn3 Mn7 Mn8 -100.86(17) . . . . ? 
O29 Mn7 Mn8 O36 -92.6(4) . . . . ? 
O3 Mn7 Mn8 O36 81.2(4) . . . . ? 
O33 Mn7 Mn8 O36 -3.6(5) . . . . ? 
O28 Mn7 Mn8 O36 167.9(4) 5_665 . . . ? 
O1 Mn7 Mn8 O36 173.9(5) . . . . ? 
O30 Mn7 Mn8 O36 -15.4(5) . . . . ? 
Mn9 Mn7 Mn8 O36 -71.1(4) 5_665 . . . ? 
Mn3 Mn7 Mn8 O36 49.8(3) . . . . ? 
O29 Mn7 Mn8 O1 93.5(4) . . . . ? 
O3 Mn7 Mn8 O1 -92.7(4) . . . . ? 
O33 Mn7 Mn8 O1 -177.5(5) . . . . ? 
O28 Mn7 Mn8 O1 -6.0(5) 5_665 . . . ? 
O30 Mn7 Mn8 O1 170.7(5) . . . . ? 
Mn9 Mn7 Mn8 O1 115.0(4) 5_665 . . . ? 
Mn3 Mn7 Mn8 O1 -124.1(4) . . . . ? 
O29 Mn7 Mn8 O2 -170.6(3) . . . . ? 
O3 Mn7 Mn8 O2 3.2(3) . . . . ? 
O33 Mn7 Mn8 O2 -81.6(4) . . . . ? 
O28 Mn7 Mn8 O2 89.9(4) 5_665 . . . ? 
O1 Mn7 Mn8 O2 95.9(4) . . . . ? 
O30 Mn7 Mn8 O2 -93.4(4) . . . . ? 
Mn9 Mn7 Mn8 O2 -149.1(2) 5_665 . . . ? 
Mn3 Mn7 Mn8 O2 -28.2(2) . . . . ? 
O29 Mn7 Mn8 O19 2.4(3) . . . . ? 
O3 Mn7 Mn8 O19 176.2(3) . . . . ? 
O33 Mn7 Mn8 O19 91.3(4) . . . . ? 
O28 Mn7 Mn8 O19 -97.2(4) 5_665 . . . ? 
O1 Mn7 Mn8 O19 -91.1(4) . . . . ? 
O30 Mn7 Mn8 O19 79.6(4) . . . . ? 
Mn9 Mn7 Mn8 O19 23.9(3) 5_665 . . . ? 
Mn3 Mn7 Mn8 O19 144.8(2) . . . . ? 
O29 Mn7 Mn8 O26 96.4(4) . . . . ? 
O3 Mn7 Mn8 O26 -89.8(4) . . . . ? 
O33 Mn7 Mn8 O26 -174.6(5) . . . . ? 
O28 Mn7 Mn8 O26 -3.2(5) 5_665 . . . ? 
O1 Mn7 Mn8 O26 2.9(5) . . . . ? 
O30 Mn7 Mn8 O26 173.6(5) . . . . ? 
Mn9 Mn7 Mn8 O26 117.9(3) 5_665 . . . ? 
Mn3 Mn7 Mn8 O26 -121.2(3) . . . . ? 
O29 Mn7 Mn8 O33 -88.9(4) . . . . ? 
O3 Mn7 Mn8 O33 84.9(4) . . . . ? 
O28 Mn7 Mn8 O33 171.5(5) 5_665 . . . ? 
O1 Mn7 Mn8 O33 177.5(5) . . . . ? 
O30 Mn7 Mn8 O33 -11.8(4) . . . . ? 
Mn9 Mn7 Mn8 O33 -67.5(3) 5_665 . . . ? 
Mn3 Mn7 Mn8 O33 53.5(3) . . . . ? 
O29 Mn7 Mn8 Mn3 -142.4(2) . . . . ? 
O3 Mn7 Mn8 Mn3 31.4(2) . . . . ? 
O33 Mn7 Mn8 Mn3 -53.5(3) . . . . ? 
O28 Mn7 Mn8 Mn3 118.0(3) 5_665 . . . ? 
O1 Mn7 Mn8 Mn3 124.1(4) . . . . ? 
O30 Mn7 Mn8 Mn3 -65.2(3) . . . . ? 
Mn9 Mn7 Mn8 Mn3 -120.92(11) 5_665 . . . ? 
O38 Mn3 Mn8 O36 -0.9(3) . . . . ? 
O3 Mn3 Mn8 O36 -179.4(3) . . . . ? 
O21 Mn3 Mn8 O36 -97.1(4) . . . . ? 
O2 Mn3 Mn8 O36 84.4(4) . . . . ? 
O18 Mn3 Mn8 O36 101.8(4) . . . . ? 
O33 Mn3 Mn8 O36 -102.3(4) . . . . ? 
Mn7 Mn3 Mn8 O36 -148.4(2) . . . . ? 
Mn5 Mn3 Mn8 O36 1.1(2) . . . . ? 
O38 Mn3 Mn8 O1 180.0(3) . . . . ? 
O3 Mn3 Mn8 O1 1.5(3) . . . . ? 
O21 Mn3 Mn8 O1 83.8(4) . . . . ? 
O2 Mn3 Mn8 O1 -94.7(4) . . . . ? 
O18 Mn3 Mn8 O1 -77.3(4) . . . . ? 
O33 Mn3 Mn8 O1 78.6(4) . . . . ? 
Mn7 Mn3 Mn8 O1 32.4(2) . . . . ? 
Mn5 Mn3 Mn8 O1 -178.0(2) . . . . ? 
O38 Mn3 Mn8 O2 -85.3(4) . . . . ? 
O3 Mn3 Mn8 O2 96.2(4) . . . . ? 
O21 Mn3 Mn8 O2 178.5(5) . . . . ? 
O18 Mn3 Mn8 O2 17.4(5) . . . . ? 
O33 Mn3 Mn8 O2 173.3(5) . . . . ? 
Mn7 Mn3 Mn8 O2 127.1(4) . . . . ? 
Mn5 Mn3 Mn8 O2 -83.3(4) . . . . ? 
O38 Mn3 Mn8 O19 95.4(4) . . . . ? 
O3 Mn3 Mn8 O19 -83.0(4) . . . . ? 
O21 Mn3 Mn8 O19 -0.8(5) . . . . ? 
O2 Mn3 Mn8 O19 -179.2(5) . . . . ? 
O18 Mn3 Mn8 O19 -161.9(5) . . . . ? 
O33 Mn3 Mn8 O19 -5.9(4) . . . . ? 
Mn7 Mn3 Mn8 O19 -52.1(3) . . . . ? 
Mn5 Mn3 Mn8 O19 97.5(3) . . . . ? 
O38 Mn3 Mn8 O26 -96.7(4) . . . . ? 
O3 Mn3 Mn8 O26 84.9(4) . . . . ? 
O21 Mn3 Mn8 O26 167.2(5) . . . . ? 
O2 Mn3 Mn8 O26 -11.3(5) . . . . ? 
O18 Mn3 Mn8 O26 6.1(5) . . . . ? 
O33 Mn3 Mn8 O26 162.0(4) . . . . ? 
Mn7 Mn3 Mn8 O26 115.8(3) . . . . ? 
Mn5 Mn3 Mn8 O26 -94.6(3) . . . . ? 
O38 Mn3 Mn8 O33 101.4(4) . . . . ? 
O3 Mn3 Mn8 O33 -77.1(4) . . . . ? 
O21 Mn3 Mn8 O33 5.2(4) . . . . ? 
O2 Mn3 Mn8 O33 -173.3(5) . . . . ? 
O18 Mn3 Mn8 O33 -155.9(5) . . . . ? 
Mn7 Mn3 Mn8 O33 -46.1(3) . . . . ? 
Mn5 Mn3 Mn8 O33 103.4(3) . . . . ? 
O38 Mn3 Mn8 Mn7 147.5(2) . . . . ? 
O3 Mn3 Mn8 Mn7 -31.0(2) . . . . ? 
O21 Mn3 Mn8 Mn7 51.3(3) . . . . ? 
O2 Mn3 Mn8 Mn7 -127.1(4) . . . . ? 
O18 Mn3 Mn8 Mn7 -109.8(4) . . . . ? 
O33 Mn3 Mn8 Mn7 46.1(3) . . . . ? 
Mn5 Mn3 Mn8 Mn7 149.56(9) . . . . ? 
O32 Mn6 Mn9 O30 13.4(5) . . . 5_665 ? 
O13 Mn6 Mn9 O30 -173.2(4) . . . 5_665 ? 
O31 Mn6 Mn9 O30 169.2(5) . . . 5_665 ? 
O12 Mn6 Mn9 O30 -9.5(5) . . . 5_665 ? 
O35 Mn6 Mn9 O30 88.3(4) . . . 5_665 ? 
O11 Mn6 Mn9 O30 -90.3(4) . . . 5_665 ? 
Mn1 Mn6 Mn9 O30 48.9(4) . . . 5_665 ? 
Mn2 Mn6 Mn9 O30 138.6(3) . . . 5_665 ? 
O32 Mn6 Mn9 O31 -155.8(5) . . . . ? 
O13 Mn6 Mn9 O31 17.6(4) . . . . ? 
O12 Mn6 Mn9 O31 -178.7(5) . . . . ? 
O35 Mn6 Mn9 O31 -80.9(4) . . . . ? 
O11 Mn6 Mn9 O31 100.5(4) . . . . ? 
Mn1 Mn6 Mn9 O31 -120.2(4) . . . . ? 
Mn2 Mn6 Mn9 O31 -30.6(4) . . . . ? 
O32 Mn6 Mn9 O29 -79.9(4) . . . 5_665 ? 
O13 Mn6 Mn9 O29 93.5(4) . . . 5_665 ? 
O31 Mn6 Mn9 O29 75.9(4) . . . 5_665 ? 
O12 Mn6 Mn9 O29 -102.8(4) . . . 5_665 ? 
O35 Mn6 Mn9 O29 -5.0(3) . . . 5_665 ? 
O11 Mn6 Mn9 O29 176.4(3) . . . 5_665 ? 
Mn1 Mn6 Mn9 O29 -44.3(3) . . . 5_665 ? 
Mn2 Mn6 Mn9 O29 45.3(3) . . . 5_665 ? 
O32 Mn6 Mn9 O10 101.4(4) . . . . ? 
O13 Mn6 Mn9 O10 -85.3(4) . . . . ? 
O31 Mn6 Mn9 O10 -102.9(4) . . . . ? 
O12 Mn6 Mn9 O10 78.4(4) . . . . ? 
O35 Mn6 Mn9 O10 176.2(3) . . . . ? 
O11 Mn6 Mn9 O10 -2.4(3) . . . . ? 
Mn1 Mn6 Mn9 O10 136.9(3) . . . . ? 
Mn2 Mn6 Mn9 O10 -133.5(3) . . . . ? 
O13 Mn6 Mn9 O32 173.4(4) . . . . ? 
O31 Mn6 Mn9 O32 155.8(5) . . . . ? 
O12 Mn6 Mn9 O32 -22.9(5) . . . . ? 
O35 Mn6 Mn9 O32 74.9(4) . . . . ? 
O11 Mn6 Mn9 O32 -103.7(4) . . . . ? 
Mn1 Mn6 Mn9 O32 35.6(3) . . . . ? 
Mn2 Mn6 Mn9 O32 125.2(3) . . . . ? 
O32 Mn6 Mn9 O27 177.3(5) . . . . ? 
O13 Mn6 Mn9 O27 -9.3(4) . . . . ? 
O31 Mn6 Mn9 O27 -26.9(5) . . . . ? 
O12 Mn6 Mn9 O27 154.4(5) . . . . ? 
O35 Mn6 Mn9 O27 -107.8(4) . . . . ? 
O11 Mn6 Mn9 O27 73.6(4) . . . . ? 
Mn1 Mn6 Mn9 O27 -147.1(3) . . . . ? 
Mn2 Mn6 Mn9 O27 -57.5(3) . . . . ? 
O32 Mn6 Mn9 Mn7 -54.3(3) . . . 5_665 ? 
O13 Mn6 Mn9 Mn7 119.0(3) . . . 5_665 ? 
O31 Mn6 Mn9 Mn7 101.4(4) . . . 5_665 ? 
O12 Mn6 Mn9 Mn7 -77.3(4) . . . 5_665 ? 
O35 Mn6 Mn9 Mn7 20.6(3) . . . 5_665 ? 
O11 Mn6 Mn9 Mn7 -158.1(2) . . . 5_665 ? 
Mn1 Mn6 Mn9 Mn7 -18.79(19) . . . 5_665 ? 
Mn2 Mn6 Mn9 Mn7 70.85(16) . . . 5_665 ? 
O38 Mn5 Mn11 O6 178.7(5) . . . . ? 
O8 Mn5 Mn11 O6 -1.6(5) . . . . ? 
O9 Mn5 Mn11 O6 89.4(4) . . . . ? 
O22 Mn5 Mn11 O6 -90.8(5) . . . . ? 
O17 Mn5 Mn11 O6 -2.5(5) . . . . ? 
O34 Mn5 Mn11 O6 169.6(5) . . . . ? 
Mn4 Mn5 Mn11 O6 119.3(4) . . . . ? 
Mn3 Mn5 Mn11 O6 -143.0(4) . . . . ? 
O38 Mn5 Mn11 O4 3.3(5) . . . . ? 
O8 Mn5 Mn11 O4 -177.1(6) . . . . ? 
O9 Mn5 Mn11 O4 -86.1(5) . . . . ? 
O22 Mn5 Mn11 O4 93.7(5) . . . . ? 
O17 Mn5 Mn11 O4 -178.0(5) . . . . ? 
O34 Mn5 Mn11 O4 -5.9(5) . . . . ? 
Mn4 Mn5 Mn11 O4 -56.2(4) . . . . ? 
Mn3 Mn5 Mn11 O4 41.5(4) . . . . ? 
O38 Mn5 Mn11 O5 -88.7(4) . . . . ? 
O8 Mn5 Mn11 O5 90.9(5) . . . . ? 
O9 Mn5 Mn11 O5 -178.1(3) . . . . ? 
O22 Mn5 Mn11 O5 1.7(4) . . . . ? 
O17 Mn5 Mn11 O5 90.0(4) . . . . ? 
O34 Mn5 Mn11 O5 -97.9(4) . . . . ? 
Mn4 Mn5 Mn11 O5 -148.2(3) . . . . ? 
Mn3 Mn5 Mn11 O5 -50.5(3) . . . . ? 
O38 Mn5 Mn11 O34 9.1(4) . . . . ? 
O8 Mn5 Mn11 O34 -171.3(5) . . . . ? 
O9 Mn5 Mn11 O34 -80.2(4) . . . . ? 
O22 Mn5 Mn11 O34 99.6(4) . . . . ? 
O17 Mn5 Mn11 O34 -172.1(5) . . . . ? 
Mn4 Mn5 Mn11 O34 -50.4(3) . . . . ? 
Mn3 Mn5 Mn11 O34 47.4(3) . . . . ? 
O38 Mn5 Mn11 O8 -179.6(5) . . . . ? 
O9 Mn5 Mn11 O8 91.1(4) . . . . ? 
O22 Mn5 Mn11 O8 -89.2(4) . . . . ? 
O17 Mn5 Mn11 O8 -0.9(5) . . . . ? 
O34 Mn5 Mn11 O8 171.3(5) . . . . ? 
Mn4 Mn5 Mn11 O8 120.9(4) . . . . ? 
Mn3 Mn5 Mn11 O8 -141.4(4) . . . . ? 
O38 Mn5 Mn11 O7 89.8(4) . . . . ? 
O8 Mn5 Mn11 O7 -90.6(4) . . . . ? 
O9 Mn5 Mn11 O7 0.5(3) . . . . ? 
O22 Mn5 Mn11 O7 -179.8(3) . . . . ? 
O17 Mn5 Mn11 O7 -91.5(4) . . . . ? 
O34 Mn5 Mn11 O7 80.7(4) . . . . ? 
Mn4 Mn5 Mn11 O7 30.3(2) . . . . ? 
Mn3 Mn5 Mn11 O7 128.0(2) . . . . ? 
O38 Mn5 Mn11 Mn4 59.5(3) . . . . ? 
O8 Mn5 Mn11 Mn4 -120.9(4) . . . . ? 
O9 Mn5 Mn11 Mn4 -29.8(2) . . . . ? 
O22 Mn5 Mn11 Mn4 149.9(3) . . . . ? 
O17 Mn5 Mn11 Mn4 -121.8(4) . . . . ? 
O34 Mn5 Mn11 Mn4 50.4(3) . . . . ? 
Mn3 Mn5 Mn11 Mn4 97.72(14) . . . . ? 
O37 Mn4 Mn11 O6 -179.0(4) . . . . ? 
O7 Mn4 Mn11 O6 2.7(5) . . . . ? 
O23 Mn4 Mn11 O6 89.1(4) . . . . ? 
O9 Mn4 Mn11 O6 -91.2(4) . . . . ? 
O16 Mn4 Mn11 O6 -3.3(5) . . . . ? 
O34 Mn4 Mn11 O6 -174.0(5) . . . . ? 
Mn5 Mn4 Mn11 O6 -119.8(3) . . . . ? 
Mn2 Mn4 Mn11 O6 140.5(3) . . . . ? 
O37 Mn4 Mn11 O4 85.9(4) . . . . ? 
O7 Mn4 Mn11 O4 -92.5(4) . . . . ? 
O23 Mn4 Mn11 O4 -6.1(4) . . . . ? 
O9 Mn4 Mn11 O4 173.7(3) . . . . ? 
O16 Mn4 Mn11 O4 -98.5(4) . . . . ? 
O34 Mn4 Mn11 O4 90.8(4) . . . . ? 
Mn5 Mn4 Mn11 O4 145.0(3) . . . . ? 
Mn2 Mn4 Mn11 O4 45.3(3) . . . . ? 
O37 Mn4 Mn11 O5 -9.2(5) . . . . ? 
O7 Mn4 Mn11 O5 172.5(5) . . . . ? 
O23 Mn4 Mn11 O5 -101.1(5) . . . . ? 
O9 Mn4 Mn11 O5 78.7(4) . . . . ? 
O16 Mn4 Mn11 O5 166.5(5) . . . . ? 
O34 Mn4 Mn11 O5 -4.2(5) . . . . ? 
Mn5 Mn4 Mn11 O5 50.0(4) . . . . ? 
Mn2 Mn4 Mn11 O5 -49.7(4) . . . . ? 
O37 Mn4 Mn11 O34 -5.0(4) . . . . ? 
O7 Mn4 Mn11 O34 176.7(5) . . . . ? 
O23 Mn4 Mn11 O34 -96.9(4) . . . . ? 
O9 Mn4 Mn11 O34 82.8(4) . . . . ? 
O16 Mn4 Mn11 O34 170.7(4) . . . . ? 
Mn5 Mn4 Mn11 O34 54.2(3) . . . . ? 
Mn2 Mn4 Mn11 O34 -45.5(3) . . . . ? 
O37 Mn4 Mn11 O8 -90.0(4) . . . . ? 
O7 Mn4 Mn11 O8 91.7(4) . . . . ? 
O23 Mn4 Mn11 O8 178.1(3) . . . . ? 
O9 Mn4 Mn11 O8 -2.1(3) . . . . ? 
O16 Mn4 Mn11 O8 85.7(4) . . . . ? 
O34 Mn4 Mn11 O8 -85.0(4) . . . . ? 
Mn5 Mn4 Mn11 O8 -30.8(2) . . . . ? 
Mn2 Mn4 Mn11 O8 -130.5(3) . . . . ? 
O37 Mn4 Mn11 O7 178.4(5) . . . . ? 
O23 Mn4 Mn11 O7 86.4(4) . . . . ? 
O9 Mn4 Mn11 O7 -93.8(4) . . . . ? 
O16 Mn4 Mn11 O7 -6.0(5) . . . . ? 
O34 Mn4 Mn11 O7 -176.7(5) . . . . ? 
Mn5 Mn4 Mn11 O7 -122.5(3) . . . . ? 
Mn2 Mn4 Mn11 O7 137.8(4) . . . . ? 
O37 Mn4 Mn11 Mn5 -59.1(3) . . . . ? 
O7 Mn4 Mn11 Mn5 122.5(3) . . . . ? 
O23 Mn4 Mn11 Mn5 -151.1(3) . . . . ? 
O9 Mn4 Mn11 Mn5 28.7(2) . . . . ? 
O16 Mn4 Mn11 Mn5 116.5(3) . . . . ? 
O34 Mn4 Mn11 Mn5 -54.2(3) . . . . ? 
Mn2 Mn4 Mn11 Mn5 -99.70(14) . . . . ? 
N2 C50 N1 C48 3.1(14) . . . . ? 
N2 C50 N1 Mn10 167.6(8) . . . . ? 
C49 C48 N1 C50 -1.9(15) . . . . ? 
C49 C48 N1 Mn10 -166.8(9) . . . . ? 
O36 Mn10 N1 C50 -22.1(11) . . . . ? 
O37 Mn10 N1 C50 102.8(10) . . . . ? 
O38 Mn10 N1 C50 -141.1(10) . . . . ? 
O36 Mn10 N1 C48 139.2(9) . . . . ? 
O37 Mn10 N1 C48 -95.9(10) . . . . ? 
O38 Mn10 N1 C48 20.2(11) . . . . ? 
N1 C50 N2 C49 -3.0(15) . . . . ? 
C48 C49 N2 C50 1.7(15) . . . . ? 
C3 C4 O1 Mn8 -61.8(12) . . . . ? 
C3 C4 O1 Mn7 62.1(12) . . . . ? 
O36 Mn8 O1 C4 75(4) . . . . ? 
O2 Mn8 O1 C4 48.9(7) . . . . ? 
O19 Mn8 O1 C4 -141.9(7) . . . . ? 
O26 Mn8 O1 C4 -48.2(8) . . . . ? 
O33 Mn8 O1 C4 128.0(8) . . . . ? 
Mn7 Mn8 O1 C4 129.5(8) . . . . ? 
Mn3 Mn8 O1 C4 84.8(7) . . . . ? 
O36 Mn8 O1 Mn7 -54(4) . . . . ? 
O2 Mn8 O1 Mn7 -80.6(4) . . . . ? 
O19 Mn8 O1 Mn7 88.6(4) . . . . ? 
O26 Mn8 O1 Mn7 -177.8(4) . . . . ? 
O33 Mn8 O1 Mn7 -1.5(3) . . . . ? 
Mn3 Mn8 O1 Mn7 -44.7(3) . . . . ? 
O29 Mn7 O1 C4 136.6(7) . . . . ? 
O3 Mn7 O1 C4 -46.4(8) . . . . ? 
O33 Mn7 O1 C4 -129.7(8) . . . . ? 
O28 Mn7 O1 C4 43.8(8) 5_665 . . . ? 
O30 Mn7 O1 C4 167(2) . . . . ? 
Mn9 Mn7 O1 C4 124.7(7) 5_665 . . . ? 
Mn3 Mn7 O1 C4 -84.1(7) . . . . ? 
Mn8 Mn7 O1 C4 -131.5(9) . . . . ? 
O29 Mn7 O1 Mn8 -91.9(4) . . . . ? 
O3 Mn7 O1 Mn8 85.0(4) . . . . ? 
O33 Mn7 O1 Mn8 1.7(3) . . . . ? 
O28 Mn7 O1 Mn8 175.3(4) 5_665 . . . ? 
O30 Mn7 O1 Mn8 -61(3) . . . . ? 
Mn9 Mn7 O1 Mn8 -103.8(3) 5_665 . . . ? 
Mn3 Mn7 O1 Mn8 47.3(3) . . . . ? 
C3 C6 O2 Mn8 64.1(11) . . . . ? 
C3 C6 O2 Mn3 -66.3(12) . . . . ? 
O36 Mn8 O2 C6 131.5(7) . . . . ? 
O1 Mn8 O2 C6 -50.8(7) . . . . ? 
O19 Mn8 O2 C6 -130.5(17) . . . . ? 
O26 Mn8 O2 C6 38.2(7) . . . . ? 
O33 Mn8 O2 C6 -128.8(7) . . . . ? 
Mn7 Mn8 O2 C6 -90.7(7) . . . . ? 
Mn3 Mn8 O2 C6 -133.5(9) . . . . ? 
O36 Mn8 O2 Mn3 -95.0(4) . . . . ? 
O1 Mn8 O2 Mn3 82.7(4) . . . . ? 
O19 Mn8 O2 Mn3 3.0(19) . . . . ? 
O26 Mn8 O2 Mn3 171.6(3) . . . . ? 
O33 Mn8 O2 Mn3 4.7(3) . . . . ? 
Mn7 Mn8 O2 Mn3 42.8(3) . . . . ? 
O38 Mn3 O2 C6 -130.1(8) . . . . ? 
O3 Mn3 O2 C6 54.0(8) . . . . ? 
O21 Mn3 O2 C6 130.1(14) . . . . ? 
O18 Mn3 O2 C6 -32.8(8) . . . . ? 
O33 Mn3 O2 C6 130.2(8) . . . . ? 
Mn7 Mn3 O2 C6 90.9(7) . . . . ? 
Mn5 Mn3 O2 C6 -110.8(7) . . . . ? 
Mn8 Mn3 O2 C6 134.9(9) . . . . ? 
O38 Mn3 O2 Mn8 95.1(4) . . . . ? 
O3 Mn3 O2 Mn8 -80.8(4) . . . . ? 
O21 Mn3 O2 Mn8 -4.8(16) . . . . ? 
O18 Mn3 O2 Mn8 -167.6(4) . . . . ? 
O33 Mn3 O2 Mn8 -4.7(3) . . . . ? 
Mn7 Mn3 O2 Mn8 -44.0(3) . . . . ? 
Mn5 Mn3 O2 Mn8 114.3(3) . . . . ? 
C3 C5 O3 Mn7 -64.4(11) . . . . ? 
C3 C5 O3 Mn3 66.5(11) . . . . ? 
O29 Mn7 O3 C5 -155(2) . . . . ? 
O33 Mn7 O3 C5 130.4(7) . . . . ? 
O28 Mn7 O3 C5 -42.6(7) 5_665 . . . ? 
O1 Mn7 O3 C5 50.0(7) . . . . ? 
O30 Mn7 O3 C5 -133.8(7) . . . . ? 
Mn9 Mn7 O3 C5 -121.6(7) 5_665 . . . ? 
Mn3 Mn7 O3 C5 135.3(9) . . . . ? 
Mn8 Mn7 O3 C5 86.3(7) . . . . ? 
O29 Mn7 O3 Mn3 69(3) . . . . ? 
O33 Mn7 O3 Mn3 -4.9(3) . . . . ? 
O28 Mn7 O3 Mn3 -177.9(4) 5_665 . . . ? 
O1 Mn7 O3 Mn3 -85.2(3) . . . . ? 
O30 Mn7 O3 Mn3 90.9(4) . . . . ? 
Mn9 Mn7 O3 Mn3 103.1(3) 5_665 . . . ? 
Mn8 Mn7 O3 Mn3 -49.0(3) . . . . ? 
O38 Mn3 O3 C5 -108(4) . . . . ? 
O21 Mn3 O3 C5 138.7(7) . . . . ? 
O2 Mn3 O3 C5 -55.0(7) . . . . ? 
O18 Mn3 O3 C5 45.9(7) . . . . ? 
O33 Mn3 O3 C5 -133.8(7) . . . . ? 
Mn7 Mn3 O3 C5 -138.3(8) . . . . ? 
Mn5 Mn3 O3 C5 88.6(9) . . . . ? 
Mn8 Mn3 O3 C5 -90.4(7) . . . . ? 
O38 Mn3 O3 Mn7 31(4) . . . . ? 
O21 Mn3 O3 Mn7 -83.0(4) . . . . ? 
O2 Mn3 O3 Mn7 83.3(4) . . . . ? 
O18 Mn3 O3 Mn7 -175.9(4) . . . . ? 
O33 Mn3 O3 Mn7 4.5(3) . . . . ? 
Mn5 Mn3 O3 Mn7 -133.2(4) . . . . ? 
Mn8 Mn3 O3 Mn7 47.9(3) . . . . ? 
C9 C10 O4 Mn11 17.0(16) . . . . ? 
O6 Mn11 O4 C10 38.1(10) . . . . ? 
O5 Mn11 O4 C10 -55.1(10) . . . . ? 
O34 Mn11 O4 C10 -149.5(10) . . . . ? 
O8 Mn11 O4 C10 -158(2) . . . . ? 
O7 Mn11 O4 C10 131.7(10) . . . . ? 
Mn5 Mn11 O4 C10 -145.4(9) . . . . ? 
Mn4 Mn11 O4 C10 168.2(10) . . . . ? 
C9 C11 O5 Mn11 16.6(16) . . . . ? 
O6 Mn11 O5 C11 -57.4(10) . . . . ? 
O4 Mn11 O5 C11 36.0(10) . . . . ? 
O34 Mn11 O5 C11 127.6(10) . . . . ? 
O8 Mn11 O5 C11 -151.3(10) . . . . ? 
O7 Mn11 O5 C11 162(2) . . . . ? 
Mn5 Mn11 O5 C11 172.3(9) . . . . ? 
Mn4 Mn11 O5 C11 130.4(9) . . . . ? 
C9 C12 O6 Mn11 18.0(15) . . . . ? 
O4 Mn11 O6 C12 -57.6(9) . . . . ? 
O5 Mn11 O6 C12 35.3(9) . . . . ? 
O34 Mn11 O6 C12 -179(76) . . . . ? 
O8 Mn11 O6 C12 124.6(9) . . . . ? 
O7 Mn11 O6 C12 -150.2(9) . . . . ? 
Mn5 Mn11 O6 C12 125.6(8) . . . . ? 
Mn4 Mn11 O6 C12 -151.7(8) . . . . ? 
C15 C16 O7 Mn4 61.2(12) . . . . ? 
C15 C16 O7 Mn11 -66.8(11) . . . . ? 
O37 Mn4 O7 C16 -143(2) . . . . ? 
O23 Mn4 O7 C16 135.3(8) . . . . ? 
O9 Mn4 O7 C16 -49.9(8) . . . . ? 
O16 Mn4 O7 C16 41.6(8) . . . . ? 
O34 Mn4 O7 C16 -131.6(8) . . . . ? 
Mn11 Mn4 O7 C16 -133.7(9) . . . . ? 
Mn5 Mn4 O7 C16 -86.8(8) . . . . ? 
Mn2 Mn4 O7 C16 104.6(8) . . . . ? 
O37 Mn4 O7 Mn11 -9(3) . . . . ? 
O23 Mn4 O7 Mn11 -91.0(4) . . . . ? 
O9 Mn4 O7 Mn11 83.8(3) . . . . ? 
O16 Mn4 O7 Mn11 175.4(3) . . . . ? 
O34 Mn4 O7 Mn11 2.1(3) . . . . ? 
Mn5 Mn4 O7 Mn11 47.0(3) . . . . ? 
Mn2 Mn4 O7 Mn11 -121.7(5) . . . . ? 
O6 Mn11 O7 C16 -43.3(7) . . . . ? 
O4 Mn11 O7 C16 -136.7(7) . . . . ? 
O5 Mn11 O7 C16 97(2) . . . . ? 
O34 Mn11 O7 C16 132.4(7) . . . . ? 
O8 Mn11 O7 C16 50.4(7) . . . . ? 
Mn5 Mn11 O7 C16 86.9(7) . . . . ? 
Mn4 Mn11 O7 C16 134.7(8) . . . . ? 
O6 Mn11 O7 Mn4 -178.0(4) . . . . ? 
O4 Mn11 O7 Mn4 88.6(4) . . . . ? 
O5 Mn11 O7 Mn4 -38(2) . . . . ? 
O34 Mn11 O7 Mn4 -2.3(3) . . . . ? 
O8 Mn11 O7 Mn4 -84.2(3) . . . . ? 
Mn5 Mn11 O7 Mn4 -47.8(3) . . . . ? 
C15 C17 O8 Mn5 -62.0(11) . . . . ? 
C15 C17 O8 Mn11 68.1(11) . . . . ? 
O38 Mn5 O8 C17 137.0(17) . . . . ? 
O9 Mn5 O8 C17 48.7(8) . . . . ? 
O22 Mn5 O8 C17 -136.6(8) . . . . ? 
O17 Mn5 O8 C17 -45.2(8) . . . . ? 
O34 Mn5 O8 C17 129.8(8) . . . . ? 
Mn11 Mn5 O8 C17 135.5(9) . . . . ? 
Mn4 Mn5 O8 C17 87.2(7) . . . . ? 
Mn3 Mn5 O8 C17 -109.6(9) . . . . ? 
O38 Mn5 O8 Mn11 2(2) . . . . ? 
O9 Mn5 O8 Mn11 -86.8(4) . . . . ? 
O22 Mn5 O8 Mn11 87.9(4) . . . . ? 
O17 Mn5 O8 Mn11 179.3(4) . . . . ? 
O34 Mn5 O8 Mn11 -5.6(3) . . . . ? 
Mn4 Mn5 O8 Mn11 -48.3(3) . . . . ? 
Mn3 Mn5 O8 Mn11 115.0(5) . . . . ? 
O6 Mn11 O8 C17 42.3(8) . . . . ? 
O4 Mn11 O8 C17 -121(3) . . . . ? 
O5 Mn11 O8 C17 135.3(8) . . . . ? 
O34 Mn11 O8 C17 -130.2(8) . . . . ? 
O7 Mn11 O8 C17 -50.9(7) . . . . ? 
Mn5 Mn11 O8 C17 -136.5(9) . . . . ? 
Mn4 Mn11 O8 C17 -87.5(7) . . . . ? 
O6 Mn11 O8 Mn5 178.7(4) . . . . ? 
O4 Mn11 O8 Mn5 15(3) . . . . ? 
O5 Mn11 O8 Mn5 -88.3(4) . . . . ? 
O34 Mn11 O8 Mn5 6.3(4) . . . . ? 
O7 Mn11 O8 Mn5 85.6(4) . . . . ? 
Mn4 Mn11 O8 Mn5 49.0(3) . . . . ? 
C15 C18 O9 Mn5 65.6(12) . . . . ? 
C15 C18 O9 Mn4 -59.2(12) . . . . ? 
O38 Mn5 O9 C18 141.7(7) . . . . ? 
O8 Mn5 O9 C18 -49.1(7) . . . . ? 
O22 Mn5 O9 C18 -89(2) . . . . ? 
O17 Mn5 O9 C18 43.0(7) . . . . ? 
O34 Mn5 O9 C18 -126.5(7) . . . . ? 
Mn11 Mn5 O9 C18 -87.5(7) . . . . ? 
Mn4 Mn5 O9 C18 -130.9(8) . . . . ? 
Mn3 Mn5 O9 C18 121.9(7) . . . . ? 
O38 Mn5 O9 Mn4 -87.4(3) . . . . ? 
O8 Mn5 O9 Mn4 81.9(3) . . . . ? 
O22 Mn5 O9 Mn4 42(2) . . . . ? 
O17 Mn5 O9 Mn4 173.9(3) . . . . ? 
O34 Mn5 O9 Mn4 4.4(3) . . . . ? 
Mn11 Mn5 O9 Mn4 43.5(3) . . . . ? 
Mn3 Mn5 O9 Mn4 -107.2(3) . . . . ? 
O37 Mn4 O9 C18 -139.3(7) . . . . ? 
O7 Mn4 O9 C18 48.4(7) . . . . ? 
O23 Mn4 O9 C18 89(3) . . . . ? 
O16 Mn4 O9 C18 -42.3(7) . . . . ? 
O34 Mn4 O9 C18 126.2(7) . . . . ? 
Mn11 Mn4 O9 C18 87.4(7) . . . . ? 
Mn5 Mn4 O9 C18 130.9(8) . . . . ? 
Mn2 Mn4 O9 C18 -120.1(7) . . . . ? 
O37 Mn4 O9 Mn5 89.8(4) . . . . ? 
O7 Mn4 O9 Mn5 -82.5(3) . . . . ? 
O23 Mn4 O9 Mn5 -42(3) . . . . ? 
O16 Mn4 O9 Mn5 -173.2(3) . . . . ? 
O34 Mn4 O9 Mn5 -4.6(3) . . . . ? 
Mn11 Mn4 O9 Mn5 -43.5(3) . . . . ? 
Mn2 Mn4 O9 Mn5 109.1(3) . . . . ? 
O11 C19 O10 Mn9 -13(2) . . . . ? 
C20 C19 O10 Mn9 164.1(9) . . . . ? 
O30 Mn9 O10 C19 143.1(11) 5_665 . . . ? 
O31 Mn9 O10 C19 -31.0(11) . . . . ? 
O29 Mn9 O10 C19 -164.0(19) 5_665 . . . ? 
O32 Mn9 O10 C19 45.9(11) . . . . ? 
O27 Mn9 O10 C19 -126.6(11) . . . . ? 
Mn6 Mn9 O10 C19 8.3(10) . . . . ? 
Mn7 Mn9 O10 C19 165.8(9) 5_665 . . . ? 
O10 C19 O11 Mn6 9.2(18) . . . . ? 
C20 C19 O11 Mn6 -168.3(8) . . . . ? 
O32 Mn6 O11 C19 -45.4(9) . . . . ? 
O13 Mn6 O11 C19 127.9(9) . . . . ? 
O31 Mn6 O11 C19 35.5(9) . . . . ? 
O12 Mn6 O11 C19 -143.7(9) . . . . ? 
O35 Mn6 O11 C19 -175.3(14) . . . . ? 
Mn9 Mn6 O11 C19 -2.0(9) . . . . ? 
Mn1 Mn6 O11 C19 -146.1(8) . . . . ? 
Mn2 Mn6 O11 C19 131.4(8) . . . . ? 
C23 C24 O12 Mn1 69.3(11) . . . . ? 
C23 C24 O12 Mn6 -61.2(11) . . . . ? 
O36 Mn1 O12 C24 -106(2) . . . . ? 
O25 Mn1 O12 C24 39.5(8) . . . . ? 
O35 Mn1 O12 C24 -132.3(8) . . . . ? 
O20 Mn1 O12 C24 132.5(8) . . . . ? 
O14 Mn1 O12 C24 -50.8(8) . . . . ? 
Mn6 Mn1 O12 C24 -135.3(9) . . . . ? 
Mn2 Mn1 O12 C24 -87.5(8) . . . . ? 
O36 Mn1 O12 Mn6 30(3) . . . . ? 
O25 Mn1 O12 Mn6 174.8(4) . . . . ? 
O35 Mn1 O12 Mn6 3.0(3) . . . . ? 
O20 Mn1 O12 Mn6 -92.2(4) . . . . ? 
O14 Mn1 O12 Mn6 84.5(4) . . . . ? 
Mn2 Mn1 O12 Mn6 47.9(3) . . . . ? 
O32 Mn6 O12 C24 -130.6(7) . . . . ? 
O13 Mn6 O12 C24 53.0(7) . . . . ? 
O31 Mn6 O12 C24 -168(100) . . . . ? 
O35 Mn6 O12 C24 134.8(8) . . . . ? 
O11 Mn6 O12 C24 -39.3(7) . . . . ? 
Mn9 Mn6 O12 C24 -114.5(7) . . . . ? 
Mn1 Mn6 O12 C24 137.7(9) . . . . ? 
Mn2 Mn6 O12 C24 89.1(7) . . . . ? 
O32 Mn6 O12 Mn1 91.7(4) . . . . ? 
O13 Mn6 O12 Mn1 -84.7(4) . . . . ? 
O31 Mn6 O12 Mn1 54(17) . . . . ? 
O35 Mn6 O12 Mn1 -2.9(3) . . . . ? 
O11 Mn6 O12 Mn1 -177.0(4) . . . . ? 
Mn9 Mn6 O12 Mn1 107.9(3) . . . . ? 
Mn2 Mn6 O12 Mn1 -48.5(3) . . . . ? 
C23 C25 O13 Mn6 66.5(10) . . . . ? 
C23 C25 O13 Mn2 -65.4(11) . . . . ? 
O32 Mn6 O13 C25 154(2) . . . . ? 
O31 Mn6 O13 C25 125.6(7) . . . . ? 
O12 Mn6 O13 C25 -55.0(7) . . . . ? 
O35 Mn6 O13 C25 -131.8(7) . . . . ? 
O11 Mn6 O13 C25 38.8(7) . . . . ? 
Mn9 Mn6 O13 C25 114.8(6) . . . . ? 
Mn1 Mn6 O13 C25 -92.2(6) . . . . ? 
Mn2 Mn6 O13 C25 -136.5(8) . . . . ? 
O32 Mn6 O13 Mn2 -70(2) . . . . ? 
O31 Mn6 O13 Mn2 -97.8(4) . . . . ? 
O12 Mn6 O13 Mn2 81.5(4) . . . . ? 
O35 Mn6 O13 Mn2 4.7(3) . . . . ? 
O11 Mn6 O13 Mn2 175.4(4) . . . . ? 
Mn9 Mn6 O13 Mn2 -108.6(3) . . . . ? 
Mn1 Mn6 O13 Mn2 44.3(3) . . . . ? 
O37 Mn2 O13 C25 114(5) . . . . ? 
O14 Mn2 O13 C25 49.8(8) . . . . ? 
O24 Mn2 O13 C25 -144.2(8) . . . . ? 
O15 Mn2 O13 C25 -46.1(8) . . . . ? 
O35 Mn2 O13 C25 130.4(8) . . . . ? 
Mn6 Mn2 O13 C25 135.0(9) . . . . ? 
Mn1 Mn2 O13 C25 91.2(7) . . . . ? 
Mn4 Mn2 O13 C25 -86.7(9) . . . . ? 
O37 Mn2 O13 Mn6 -21(5) . . . . ? 
O14 Mn2 O13 Mn6 -85.2(4) . . . . ? 
O24 Mn2 O13 Mn6 80.9(4) . . . . ? 
O15 Mn2 O13 Mn6 178.9(4) . . . . ? 
O35 Mn2 O13 Mn6 -4.5(3) . . . . ? 
Mn1 Mn2 O13 Mn6 -43.8(3) . . . . ? 
Mn4 Mn2 O13 Mn6 138.3(4) . . . . ? 
C23 C26 O14 Mn2 63.3(11) . . . . ? 
C23 C26 O14 Mn1 -59.1(11) . . . . ? 
O37 Mn2 O14 C26 134.8(8) . . . . ? 
O13 Mn2 O14 C26 -48.5(8) . . . . ? 
O24 Mn2 O14 C26 -128.9(13) . . . . ? 
O15 Mn2 O14 C26 39.4(8) . . . . ? 
O35 Mn2 O14 C26 -125.9(8) . . . . ? 
Mn6 Mn2 O14 C26 -83.4(7) . . . . ? 
Mn1 Mn2 O14 C26 -129.7(9) . . . . ? 
Mn4 Mn2 O14 C26 113.4(7) . . . . ? 
O37 Mn2 O14 Mn1 -95.5(3) . . . . ? 
O13 Mn2 O14 Mn1 81.2(3) . . . . ? 
O24 Mn2 O14 Mn1 0.7(15) . . . . ? 
O15 Mn2 O14 Mn1 169.1(3) . . . . ? 
O35 Mn2 O14 Mn1 3.8(3) . . . . ? 
Mn6 Mn2 O14 Mn1 46.2(2) . . . . ? 
Mn4 Mn2 O14 Mn1 -116.9(2) . . . . ? 
O36 Mn1 O14 C26 -140.6(7) . . . . ? 
O12 Mn1 O14 C26 46.1(7) . . . . ? 
O25 Mn1 O14 C26 -45.3(7) . . . . ? 
O35 Mn1 O14 C26 126.4(7) . . . . ? 
O20 Mn1 O14 C26 82(3) . . . . ? 
Mn6 Mn1 O14 C26 84.0(7) . . . . ? 
Mn2 Mn1 O14 C26 130.6(8) . . . . ? 
O36 Mn1 O14 Mn2 88.8(3) . . . . ? 
O12 Mn1 O14 Mn2 -84.5(3) . . . . ? 
O25 Mn1 O14 Mn2 -175.9(3) . . . . ? 
O35 Mn1 O14 Mn2 -4.2(3) . . . . ? 
O20 Mn1 O14 Mn2 -49(3) . . . . ? 
Mn6 Mn1 O14 Mn2 -46.6(2) . . . . ? 
O16 C27 O15 Mn2 29.3(19) . . . . ? 
C28 C27 O15 Mn2 -150.3(9) . . . . ? 
O37 Mn2 O15 C27 -4.7(11) . . . . ? 
O14 Mn2 O15 C27 85.4(10) . . . . ? 
O13 Mn2 O15 C27 174.1(10) . . . . ? 
O24 Mn2 O15 C27 -97.5(10) . . . . ? 
O35 Mn2 O15 C27 160.9(11) . . . . ? 
Mn6 Mn2 O15 C27 174.8(9) . . . . ? 
Mn1 Mn2 O15 C27 95.9(10) . . . . ? 
Mn4 Mn2 O15 C27 -22.8(10) . . . . ? 
O15 C27 O16 Mn4 -10.0(19) . . . . ? 
C28 C27 O16 Mn4 169.5(9) . . . . ? 
O37 Mn4 O16 C27 -27.4(10) . . . . ? 
O7 Mn4 O16 C27 152.0(10) . . . . ? 
O23 Mn4 O16 C27 66.4(10) . . . . ? 
O9 Mn4 O16 C27 -119.6(10) . . . . ? 
O34 Mn4 O16 C27 -178.0(12) . . . . ? 
Mn11 Mn4 O16 C27 155.8(9) . . . . ? 
Mn5 Mn4 O16 C27 -124.8(9) . . . . ? 
Mn2 Mn4 O16 C27 -5.3(10) . . . . ? 
O18 C29 O17 Mn5 -15(2) . . . . ? 
C30 C29 O17 Mn5 163.8(11) . . . . ? 
O38 Mn5 O17 C29 31.5(12) . . . . ? 
O8 Mn5 O17 C29 -148.1(11) . . . . ? 
O9 Mn5 O17 C29 124.1(11) . . . . ? 
O22 Mn5 O17 C29 -61.9(11) . . . . ? 
O34 Mn5 O17 C29 -172.7(13) . . . . ? 
Mn11 Mn5 O17 C29 -147.5(10) . . . . ? 
Mn4 Mn5 O17 C29 129.3(11) . . . . ? 
Mn3 Mn5 O17 C29 10.9(11) . . . . ? 
O17 C29 O18 Mn3 8(2) . . . . ? 
C30 C29 O18 Mn3 -171.3(11) . . . . ? 
O38 Mn3 O18 C29 -17.9(13) . . . . ? 
O3 Mn3 O18 C29 164.4(13) . . . . ? 
O21 Mn3 O18 C29 75.7(13) . . . . ? 
O2 Mn3 O18 C29 -108.4(13) . . . . ? 
O33 Mn3 O18 C29 165.5(11) . . . . ? 
Mn7 Mn3 O18 C29 161.4(11) . . . . ? 
Mn5 Mn3 O18 C29 1.1(12) . . . . ? 
Mn8 Mn3 O18 C29 -118.6(12) . . . . ? 
O20 C31 O19 Mn8 12.1(17) . . . . ? 
C32 C31 O19 Mn8 -169.0(8) . . . . ? 
O36 Mn8 O19 C31 -40.7(10) . . . . ? 
O1 Mn8 O19 C31 142.4(10) . . . . ? 
O2 Mn8 O19 C31 -138.1(16) . . . . ? 
O26 Mn8 O19 C31 53.2(10) . . . . ? 
O33 Mn8 O19 C31 -139.8(10) . . . . ? 
Mn7 Mn8 O19 C31 -177.5(10) . . . . ? 
Mn3 Mn8 O19 C31 -135.7(9) . . . . ? 
O19 C31 O20 Mn1 11.7(17) . . . . ? 
C32 C31 O20 Mn1 -167.2(7) . . . . ? 
O36 Mn1 O20 C31 2.0(10) . . . . ? 
O12 Mn1 O20 C31 174.9(10) . . . . ? 
O25 Mn1 O20 C31 -93.6(10) . . . . ? 
O35 Mn1 O20 C31 95.3(10) . . . . ? 
O14 Mn1 O20 C31 139(3) . . . . ? 
Mn6 Mn1 O20 C31 137.2(10) . . . . ? 
Mn2 Mn1 O20 C31 95.6(10) . . . . ? 
O22 C33 O21 Mn3 4(2) . . . . ? 
C34 C33 O21 Mn3 -175.9(9) . . . . ? 
O38 Mn3 O21 C33 27.3(12) . . . . ? 
O3 Mn3 O21 C33 -157.4(11) . . . . ? 
O2 Mn3 O21 C33 126.7(15) . . . . ? 
O18 Mn3 O21 C33 -70.2(11) . . . . ? 
O33 Mn3 O21 C33 126.6(11) . . . . ? 
Mn7 Mn3 O21 C33 165.8(11) . . . . ? 
Mn5 Mn3 O21 C33 3.7(11) . . . . ? 
Mn8 Mn3 O21 C33 123.0(11) . . . . ? 
O21 C33 O22 Mn5 -17(2) . . . . ? 
C34 C33 O22 Mn5 163.5(9) . . . . ? 
O38 Mn5 O22 C33 -7.8(12) . . . . ? 
O8 Mn5 O22 C33 -177.0(12) . . . . ? 
O9 Mn5 O22 C33 -137(2) . . . . ? 
O17 Mn5 O22 C33 90.9(12) . . . . ? 
O34 Mn5 O22 C33 -100.0(12) . . . . ? 
Mn11 Mn5 O22 C33 -138.6(12) . . . . ? 
Mn4 Mn5 O22 C33 -100.9(12) . . . . ? 
Mn3 Mn5 O22 C33 13.6(11) . . . . ? 
O24 C35 O23 Mn4 32.2(18) . . . . ? 
C36 C35 O23 Mn4 -150.8(9) . . . . ? 
O37 Mn4 O23 C35 -7.1(10) . . . . ? 
O7 Mn4 O23 C35 165.2(10) . . . . ? 
O9 Mn4 O23 C35 124(2) . . . . ? 
O16 Mn4 O23 C35 -104.3(10) . . . . ? 
O34 Mn4 O23 C35 87.7(10) . . . . ? 
Mn11 Mn4 O23 C35 126.1(10) . . . . ? 
Mn5 Mn4 O23 C35 88.6(10) . . . . ? 
Mn2 Mn4 O23 C35 -27.8(9) . . . . ? 
O23 C35 O24 Mn2 -5.1(18) . . . . ? 
C36 C35 O24 Mn2 177.8(8) . . . . ? 
O37 Mn2 O24 C35 -36.1(10) . . . . ? 
O14 Mn2 O24 C35 -132.1(13) . . . . ? 
O13 Mn2 O24 C35 147.4(10) . . . . ? 
O15 Mn2 O24 C35 59.6(10) . . . . ? 
O35 Mn2 O24 C35 -135.1(10) . . . . ? 
Mn6 Mn2 O24 C35 -177.8(9) . . . . ? 
Mn1 Mn2 O24 C35 -131.5(9) . . . . ? 
Mn4 Mn2 O24 C35 -11.0(9) . . . . ? 
O26 C37 O25 Mn1 7.9(19) . . . . ? 
C38 C37 O25 Mn1 -174.8(9) . . . . ? 
O36 Mn1 O25 C37 -36.8(10) . . . . ? 
O12 Mn1 O25 C37 148.0(10) . . . . ? 
O35 Mn1 O25 C37 -169.8(13) . . . . ? 
O20 Mn1 O25 C37 57.6(10) . . . . ? 
O14 Mn1 O25 C37 -126.8(10) . . . . ? 
Mn6 Mn1 O25 C37 152.0(8) . . . . ? 
Mn2 Mn1 O25 C37 -129.9(9) . . . . ? 
O25 C37 O26 Mn8 13(2) . . . . ? 
C38 C37 O26 Mn8 -164.5(9) . . . . ? 
O36 Mn8 O26 C37 3.0(12) . . . . ? 
O1 Mn8 O26 C37 178.7(12) . . . . ? 
O2 Mn8 O26 C37 90.9(12) . . . . ? 
O19 Mn8 O26 C37 -91.3(12) . . . . ? 
O33 Mn8 O26 C37 162.6(13) . . . . ? 
Mn7 Mn8 O26 C37 176.8(11) . . . . ? 
Mn3 Mn8 O26 C37 97.5(12) . . . . ? 
O28 C39 O27 Mn9 -5.4(18) . . . . ? 
C40 C39 O27 Mn9 179.1(8) . . . . ? 
O30 Mn9 O27 C39 -39.9(9) 5_665 . . . ? 
O31 Mn9 O27 C39 134.2(9) . . . . ? 
O29 Mn9 O27 C39 40.7(9) 5_665 . . . ? 
O10 Mn9 O27 C39 -134.0(9) . . . . ? 
O32 Mn9 O27 C39 162.7(18) . . . . ? 
Mn6 Mn9 O27 C39 151.4(8) . . . . ? 
Mn7 Mn9 O27 C39 3.5(9) 5_665 . . . ? 
O27 C39 O28 Mn7 3.6(19) . . . 5_665 ? 
C40 C39 O28 Mn7 179.4(7) . . . 5_665 ? 
O3 Mn7 O29 C41 175(2) . . . . ? 
O33 Mn7 O29 C41 -111.1(7) . . . . ? 
O28 Mn7 O29 C41 62.7(8) 5_665 . . . ? 
O1 Mn7 O29 C41 -30.4(8) . . . . ? 
O30 Mn7 O29 C41 153.2(8) . . . . ? 
Mn9 Mn7 O29 C41 137.2(9) 5_665 . . . ? 
Mn3 Mn7 O29 C41 -123.1(7) . . . . ? 
Mn8 Mn7 O29 C41 -67.0(7) . . . . ? 
O3 Mn7 O29 Mn9 38(3) . . . 5_665 ? 
O33 Mn7 O29 Mn9 111.7(3) . . . 5_665 ? 
O28 Mn7 O29 Mn9 -74.5(4) 5_665 . . 5_665 ? 
O1 Mn7 O29 Mn9 -167.6(3) . . . 5_665 ? 
O30 Mn7 O29 Mn9 16.0(3) . . . 5_665 ? 
Mn3 Mn7 O29 Mn9 99.7(4) . . . 5_665 ? 
Mn8 Mn7 O29 Mn9 155.7(2) . . . 5_665 ? 
O29 Mn7 O30 C42 -151.7(9) . . . . ? 
O3 Mn7 O30 C42 31.0(9) . . . . ? 
O33 Mn7 O30 C42 114.8(8) . . . . ? 
O28 Mn7 O30 C42 -59.5(8) 5_665 . . . ? 
O1 Mn7 O30 C42 177(2) . . . . ? 
Mn9 Mn7 O30 C42 -134.8(10) 5_665 . . . ? 
Mn3 Mn7 O30 C42 69.0(8) . . . . ? 
Mn8 Mn7 O30 C42 123.0(8) . . . . ? 
O29 Mn7 O30 Mn9 -16.9(3) . . . 5_665 ? 
O3 Mn7 O30 Mn9 165.7(3) . . . 5_665 ? 
O33 Mn7 O30 Mn9 -110.4(3) . . . 5_665 ? 
O28 Mn7 O30 Mn9 75.2(4) 5_665 . . 5_665 ? 
O1 Mn7 O30 Mn9 -48(3) . . . 5_665 ? 
Mn3 Mn7 O30 Mn9 -156.3(2) . . . 5_665 ? 
Mn8 Mn7 O30 Mn9 -102.2(3) . . . 5_665 ? 
O30 Mn9 O31 C43 158(2) 5_665 . . . ? 
O29 Mn9 O31 C43 109.1(9) 5_665 . . . ? 
O10 Mn9 O31 C43 -64.5(9) . . . . ? 
O32 Mn9 O31 C43 -154.8(9) . . . . ? 
O27 Mn9 O31 C43 21.1(9) . . . . ? 
Mn6 Mn9 O31 C43 -139.6(10) . . . . ? 
Mn7 Mn9 O31 C43 99.6(8) 5_665 . . . ? 
O30 Mn9 O31 Mn6 -62(2) 5_665 . . . ? 
O29 Mn9 O31 Mn6 -111.3(3) 5_665 . . . ? 
O10 Mn9 O31 Mn6 75.1(4) . . . . ? 
O32 Mn9 O31 Mn6 -15.2(3) . . . . ? 
O27 Mn9 O31 Mn6 160.7(3) . . . . ? 
Mn7 Mn9 O31 Mn6 -120.8(3) 5_665 . . . ? 
O32 Mn6 O31 C43 155.9(8) . . . . ? 
O13 Mn6 O31 C43 -27.6(8) . . . . ? 
O12 Mn6 O31 C43 -166(69) . . . . ? 
O35 Mn6 O31 C43 -109.6(8) . . . . ? 
O11 Mn6 O31 C43 64.7(8) . . . . ? 
Mn9 Mn6 O31 C43 138.8(9) . . . . ? 
Mn1 Mn6 O31 C43 -113.3(8) . . . . ? 
Mn2 Mn6 O31 C43 -63.9(8) . . . . ? 
O32 Mn6 O31 Mn9 17.1(3) . . . . ? 
O13 Mn6 O31 Mn9 -166.5(3) . . . . ? 
O12 Mn6 O31 Mn9 55(17) . . . . ? 
O35 Mn6 O31 Mn9 111.6(3) . . . . ? 
O11 Mn6 O31 Mn9 -74.2(4) . . . . ? 
Mn1 Mn6 O31 Mn9 107.8(3) . . . . ? 
Mn2 Mn6 O31 Mn9 157.3(3) . . . . ? 
O13 Mn6 O32 C44 -176(2) . . . . ? 
O31 Mn6 O32 C44 -147.9(7) . . . . ? 
O12 Mn6 O32 C44 32.7(7) . . . . ? 
O35 Mn6 O32 C44 110.1(7) . . . . ? 
O11 Mn6 O32 C44 -61.3(7) . . . . ? 
Mn9 Mn6 O32 C44 -133.0(8) . . . . ? 
Mn1 Mn6 O32 C44 70.4(7) . . . . ? 
Mn2 Mn6 O32 C44 122.6(7) . . . . ? 
O13 Mn6 O32 Mn9 -43(2) . . . . ? 
O31 Mn6 O32 Mn9 -14.9(3) . . . . ? 
O12 Mn6 O32 Mn9 165.7(3) . . . . ? 
O35 Mn6 O32 Mn9 -116.9(3) . . . . ? 
O11 Mn6 O32 Mn9 71.7(3) . . . . ? 
Mn1 Mn6 O32 Mn9 -156.6(2) . . . . ? 
Mn2 Mn6 O32 Mn9 -104.4(3) . . . . ? 
O30 Mn9 O32 C44 -37.4(8) 5_665 . . . ? 
O31 Mn9 O32 C44 149.0(8) . . . . ? 
O29 Mn9 O32 C44 -118.8(8) 5_665 . . . ? 
O10 Mn9 O32 C44 56.8(8) . . . . ? 
O27 Mn9 O32 C44 120(2) . . . . ? 
Mn6 Mn9 O32 C44 133.1(9) . . . . ? 
Mn7 Mn9 O32 C44 -81.9(8) 5_665 . . . ? 
O30 Mn9 O32 Mn6 -170.5(3) 5_665 . . . ? 
O31 Mn9 O32 Mn6 15.9(3) . . . . ? 
O29 Mn9 O32 Mn6 108.1(3) 5_665 . . . ? 
O10 Mn9 O32 Mn6 -76.3(4) . . . . ? 
O27 Mn9 O32 Mn6 -13(2) . . . . ? 
Mn7 Mn9 O32 Mn6 145.0(2) 5_665 . . . ? 
O29 Mn7 O33 C45 -36.6(9) . . . . ? 
O3 Mn7 O33 C45 136.6(9) . . . . ? 
O28 Mn7 O33 C45 -176.4(18) 5_665 . . . ? 
O1 Mn7 O33 C45 -134.4(9) . . . . ? 
O30 Mn7 O33 C45 39.5(9) . . . . ? 
Mn9 Mn7 O33 C45 2.4(9) 5_665 . . . ? 
Mn3 Mn7 O33 C45 132.4(9) . . . . ? 
Mn8 Mn7 O33 C45 -133.0(9) . . . . ? 
O29 Mn7 O33 Mn3 -169.0(3) . . . . ? 
O3 Mn7 O33 Mn3 4.2(3) . . . . ? 
O28 Mn7 O33 Mn3 51(2) 5_665 . . . ? 
O1 Mn7 O33 Mn3 93.1(3) . . . . ? 
O30 Mn7 O33 Mn3 -93.0(3) . . . . ? 
Mn9 Mn7 O33 Mn3 -130.01(19) 5_665 . . . ? 
Mn8 Mn7 O33 Mn3 94.6(3) . . . . ? 
O29 Mn7 O33 Mn8 96.3(3) . . . . ? 
O3 Mn7 O33 Mn8 -90.4(3) . . . . ? 
O28 Mn7 O33 Mn8 -43(2) 5_665 . . . ? 
O1 Mn7 O33 Mn8 -1.5(3) . . . . ? 
O30 Mn7 O33 Mn8 172.4(3) . . . . ? 
Mn9 Mn7 O33 Mn8 135.4(2) 5_665 . . . ? 
Mn3 Mn7 O33 Mn8 -94.6(3) . . . . ? 
O38 Mn3 O33 C45 45.1(8) . . . . ? 
O3 Mn3 O33 C45 -137.2(8) . . . . ? 
O21 Mn3 O33 C45 -47.8(8) . . . . ? 
O2 Mn3 O33 C45 132.2(8) . . . . ? 
O18 Mn3 O33 C45 -138.3(12) . . . . ? 
Mn7 Mn3 O33 C45 -132.9(9) . . . . ? 
Mn5 Mn3 O33 C45 24.0(8) . . . . ? 
Mn8 Mn3 O33 C45 128.3(8) . . . . ? 
O38 Mn3 O33 Mn7 178.1(3) . . . . ? 
O3 Mn3 O33 Mn7 -4.2(3) . . . . ? 
O21 Mn3 O33 Mn7 85.2(3) . . . . ? 
O2 Mn3 O33 Mn7 -94.8(3) . . . . ? 
O18 Mn3 O33 Mn7 -5.4(13) . . . . ? 
Mn5 Mn3 O33 Mn7 156.96(16) . . . . ? 
Mn8 Mn3 O33 Mn7 -98.8(3) . . . . ? 
O38 Mn3 O33 Mn8 -83.2(3) . . . . ? 
O3 Mn3 O33 Mn8 94.5(3) . . . . ? 
O21 Mn3 O33 Mn8 -176.0(3) . . . . ? 
O2 Mn3 O33 Mn8 4.0(3) . . . . ? 
O18 Mn3 O33 Mn8 93.4(12) . . . . ? 
Mn7 Mn3 O33 Mn8 98.8(3) . . . . ? 
Mn5 Mn3 O33 Mn8 -104.3(2) . . . . ? 
O36 Mn8 O33 C45 -48.0(8) . . . . ? 
O1 Mn8 O33 C45 136.2(8) . . . . ? 
O2 Mn8 O33 C45 -133.6(8) . . . . ? 
O19 Mn8 O33 C45 46.1(8) . . . . ? 
O26 Mn8 O33 C45 152.6(14) . . . . ? 
Mn7 Mn8 O33 C45 134.5(9) . . . . ? 
Mn3 Mn8 O33 C45 -129.6(9) . . . . ? 
O36 Mn8 O33 Mn7 177.5(3) . . . . ? 
O1 Mn8 O33 Mn7 1.6(3) . . . . ? 
O2 Mn8 O33 Mn7 91.9(3) . . . . ? 
O19 Mn8 O33 Mn7 -88.4(3) . . . . ? 
O26 Mn8 O33 Mn7 18.1(16) . . . . ? 
Mn3 Mn8 O33 Mn7 95.9(3) . . . . ? 
O36 Mn8 O33 Mn3 81.6(3) . . . . ? 
O1 Mn8 O33 Mn3 -94.3(3) . . . . ? 
O2 Mn8 O33 Mn3 -4.0(3) . . . . ? 
O19 Mn8 O33 Mn3 175.7(3) . . . . ? 
O26 Mn8 O33 Mn3 -77.8(15) . . . . ? 
Mn7 Mn8 O33 Mn3 -95.9(3) . . . . ? 
O6 Mn11 O34 C46 166(2) . . . . ? 
O4 Mn11 O34 C46 44.9(8) . . . . ? 
O5 Mn11 O34 C46 -47.9(8) . . . . ? 
O8 Mn11 O34 C46 -136.3(8) . . . . ? 
O7 Mn11 O34 C46 137.0(8) . . . . ? 
Mn5 Mn11 O34 C46 -131.1(9) . . . . ? 
Mn4 Mn11 O34 C46 135.0(9) . . . . ? 
O6 Mn11 O34 Mn4 31(2) . . . . ? 
O4 Mn11 O34 Mn4 -90.1(4) . . . . ? 
O5 Mn11 O34 Mn4 177.1(3) . . . . ? 
O8 Mn11 O34 Mn4 88.7(3) . . . . ? 
O7 Mn11 O34 Mn4 2.0(3) . . . . ? 
Mn5 Mn11 O34 Mn4 93.9(3) . . . . ? 
O6 Mn11 O34 Mn5 -63(2) . . . . ? 
O4 Mn11 O34 Mn5 176.0(3) . . . . ? 
O5 Mn11 O34 Mn5 83.2(3) . . . . ? 
O8 Mn11 O34 Mn5 -5.2(3) . . . . ? 
O7 Mn11 O34 Mn5 -91.9(3) . . . . ? 
Mn4 Mn11 O34 Mn5 -93.9(3) . . . . ? 
O37 Mn4 O34 C46 42.9(8) . . . . ? 
O7 Mn4 O34 C46 -135.7(8) . . . . ? 
O23 Mn4 O34 C46 -50.7(8) . . . . ? 
O9 Mn4 O34 C46 134.1(8) . . . . ? 
O16 Mn4 O34 C46 -166.4(13) . . . . ? 
Mn11 Mn4 O34 C46 -133.5(9) . . . . ? 
Mn5 Mn4 O34 C46 130.2(8) . . . . ? 
Mn2 Mn4 O34 C46 21.5(8) . . . . ? 
O37 Mn4 O34 Mn11 176.4(3) . . . . ? 
O7 Mn4 O34 Mn11 -2.2(3) . . . . ? 
O23 Mn4 O34 Mn11 82.8(3) . . . . ? 
O9 Mn4 O34 Mn11 -92.4(3) . . . . ? 
O16 Mn4 O34 Mn11 -32.9(15) . . . . ? 
Mn5 Mn4 O34 Mn11 -96.3(3) . . . . ? 
Mn2 Mn4 O34 Mn11 154.98(18) . . . . ? 
O37 Mn4 O34 Mn5 -87.3(3) . . . . ? 
O7 Mn4 O34 Mn5 94.2(3) . . . . ? 
O23 Mn4 O34 Mn5 179.2(3) . . . . ? 
O9 Mn4 O34 Mn5 4.0(3) . . . . ? 
O16 Mn4 O34 Mn5 63.4(14) . . . . ? 
Mn11 Mn4 O34 Mn5 96.3(3) . . . . ? 
Mn2 Mn4 O34 Mn5 -108.69(19) . . . . ? 
O38 Mn5 O34 C46 -43.2(7) . . . . ? 
O8 Mn5 O34 C46 135.5(8) . . . . ? 
O9 Mn5 O34 C46 -134.8(7) . . . . ? 
O22 Mn5 O34 C46 50.1(7) . . . . ? 
O17 Mn5 O34 C46 160.8(15) . . . . ? 
Mn11 Mn5 O34 C46 129.9(8) . . . . ? 
Mn4 Mn5 O34 C46 -130.7(8) . . . . ? 
Mn3 Mn5 O34 C46 -23.0(8) . . . . ? 
O38 Mn5 O34 Mn11 -173.1(3) . . . . ? 
O8 Mn5 O34 Mn11 5.6(3) . . . . ? 
O9 Mn5 O34 Mn11 95.2(3) . . . . ? 
O22 Mn5 O34 Mn11 -79.8(3) . . . . ? 
O17 Mn5 O34 Mn11 30.9(17) . . . . ? 
Mn4 Mn5 O34 Mn11 99.3(4) . . . . ? 
Mn3 Mn5 O34 Mn11 -152.99(19) . . . . ? 
O38 Mn5 O34 Mn4 87.6(3) . . . . ? 
O8 Mn5 O34 Mn4 -93.8(3) . . . . ? 
O9 Mn5 O34 Mn4 -4.1(3) . . . . ? 
O22 Mn5 O34 Mn4 -179.1(3) . . . . ? 
O17 Mn5 O34 Mn4 -68.4(16) . . . . ? 
Mn11 Mn5 O34 Mn4 -99.3(4) . . . . ? 
Mn3 Mn5 O34 Mn4 107.7(2) . . . . ? 
O36 Mn1 O35 C47 47.2(8) . . . . ? 
O12 Mn1 O35 C47 -136.6(8) . . . . ? 
O25 Mn1 O35 C47 -180(100) . . . . ? 
O20 Mn1 O35 C47 -47.2(8) . . . . ? 
O14 Mn1 O35 C47 136.7(8) . . . . ? 
Mn6 Mn1 O35 C47 -133.8(9) . . . . ? 
Mn2 Mn1 O35 C47 133.1(8) . . . . ? 
O36 Mn1 O35 Mn6 -179.0(3) . . . . ? 
O12 Mn1 O35 Mn6 -2.8(3) . . . . ? 
O25 Mn1 O35 Mn6 -45.9(16) . . . . ? 
O20 Mn1 O35 Mn6 86.6(3) . . . . ? 
O14 Mn1 O35 Mn6 -89.5(3) . . . . ? 
Mn2 Mn1 O35 Mn6 -93.1(3) . . . . ? 
O36 Mn1 O35 Mn2 -86.0(3) . . . . ? 
O12 Mn1 O35 Mn2 90.3(3) . . . . ? 
O25 Mn1 O35 Mn2 47.2(16) . . . . ? 
O20 Mn1 O35 Mn2 179.7(3) . . . . ? 
O14 Mn1 O35 Mn2 3.6(3) . . . . ? 
Mn6 Mn1 O35 Mn2 93.1(3) . . . . ? 
O32 Mn6 O35 C47 40.3(8) . . . . ? 
O13 Mn6 O35 C47 -132.5(7) . . . . ? 
O31 Mn6 O35 C47 -41.8(8) . . . . ? 
O12 Mn6 O35 C47 137.3(8) . . . . ? 
O11 Mn6 O35 C47 169.8(14) . . . . ? 
Mn9 Mn6 O35 C47 -3.1(8) . . . . ? 
Mn1 Mn6 O35 C47 134.5(9) . . . . ? 
Mn2 Mn6 O35 C47 -128.6(8) . . . . ? 
O32 Mn6 O35 Mn1 -94.3(3) . . . . ? 
O13 Mn6 O35 Mn1 93.0(3) . . . . ? 
O31 Mn6 O35 Mn1 -176.4(3) . . . . ? 
O12 Mn6 O35 Mn1 2.8(3) . . . . ? 
O11 Mn6 O35 Mn1 35.2(17) . . . . ? 
Mn9 Mn6 O35 Mn1 -137.6(2) . . . . ? 
Mn2 Mn6 O35 Mn1 96.9(3) . . . . ? 
O32 Mn6 O35 Mn2 168.9(3) . . . . ? 
O13 Mn6 O35 Mn2 -3.9(3) . . . . ? 
O31 Mn6 O35 Mn2 86.8(3) . . . . ? 
O12 Mn6 O35 Mn2 -94.1(3) . . . . ? 
O11 Mn6 O35 Mn2 -61.6(16) . . . . ? 
Mn9 Mn6 O35 Mn2 125.48(18) . . . . ? 
Mn1 Mn6 O35 Mn2 -96.9(3) . . . . ? 
O37 Mn2 O35 C47 -49.3(7) . . . . ? 
O14 Mn2 O35 C47 -137.3(7) . . . . ? 
O13 Mn2 O35 C47 131.7(7) . . . . ? 
O24 Mn2 O35 C47 41.9(7) . . . . ? 
O15 Mn2 O35 C47 145.2(11) . . . . ? 
Mn6 Mn2 O35 C47 127.9(8) . . . . ? 
Mn1 Mn2 O35 C47 -133.3(8) . . . . ? 
Mn4 Mn2 O35 C47 -30.6(7) . . . . ? 
O37 Mn2 O35 Mn1 84.0(3) . . . . ? 
O14 Mn2 O35 Mn1 -4.0(3) . . . . ? 
O13 Mn2 O35 Mn1 -94.9(3) . . . . ? 
O24 Mn2 O35 Mn1 175.3(3) . . . . ? 
O15 Mn2 O35 Mn1 -81.5(11) . . . . ? 
Mn6 Mn2 O35 Mn1 -98.8(3) . . . . ? 
Mn4 Mn2 O35 Mn1 102.8(2) . . . . ? 
O37 Mn2 O35 Mn6 -177.2(3) . . . . ? 
O14 Mn2 O35 Mn6 94.8(3) . . . . ? 
O13 Mn2 O35 Mn6 3.8(3) . . . . ? 
O24 Mn2 O35 Mn6 -85.9(3) . . . . ? 
O15 Mn2 O35 Mn6 17.3(12) . . . . ? 
Mn1 Mn2 O35 Mn6 98.8(3) . . . . ? 
Mn4 Mn2 O35 Mn6 -158.45(13) . . . . ? 
O12 Mn1 O36 Mn8 -162(2) . . . . ? 
O25 Mn1 O36 Mn8 53.3(5) . . . . ? 
O35 Mn1 O36 Mn8 -135.5(5) . . . . ? 
O20 Mn1 O36 Mn8 -40.1(5) . . . . ? 
O14 Mn1 O36 Mn8 143.7(5) . . . . ? 
Mn6 Mn1 O36 Mn8 -136.4(3) . . . . ? 
Mn2 Mn1 O36 Mn8 -179.8(4) . . . . ? 
O12 Mn1 O36 Mn10 52(3) . . . . ? 
O25 Mn1 O36 Mn10 -92.9(4) . . . . ? 
O35 Mn1 O36 Mn10 78.3(4) . . . . ? 
O20 Mn1 O36 Mn10 173.8(4) . . . . ? 
O14 Mn1 O36 Mn10 -2.5(4) . . . . ? 
Mn6 Mn1 O36 Mn10 77.4(4) . . . . ? 
Mn2 Mn1 O36 Mn10 34.1(3) . . . . ? 
O1 Mn8 O36 Mn1 -164(4) . . . . ? 
O2 Mn8 O36 Mn1 -138.0(5) . . . . ? 
O19 Mn8 O36 Mn1 52.9(5) . . . . ? 
O26 Mn8 O36 Mn1 -41.0(5) . . . . ? 
O33 Mn8 O36 Mn1 143.7(4) . . . . ? 
Mn7 Mn8 O36 Mn1 145.9(3) . . . . ? 
Mn3 Mn8 O36 Mn1 -173.8(4) . . . . ? 
O1 Mn8 O36 Mn10 -18(4) . . . . ? 
O2 Mn8 O36 Mn10 8.2(4) . . . . ? 
O19 Mn8 O36 Mn10 -160.9(4) . . . . ? 
O26 Mn8 O36 Mn10 105.3(4) . . . . ? 
O33 Mn8 O36 Mn10 -70.0(4) . . . . ? 
Mn7 Mn8 O36 Mn10 -67.8(5) . . . . ? 
Mn3 Mn8 O36 Mn10 -27.6(3) . . . . ? 
O37 Mn10 O36 Mn1 -55.7(4) . . . . ? 
O38 Mn10 O36 Mn1 -160.1(3) . . . . ? 
N1 Mn10 O36 Mn1 78.4(5) . . . . ? 
O37 Mn10 O36 Mn8 155.2(4) . . . . ? 
O38 Mn10 O36 Mn8 50.8(4) . . . . ? 
N1 Mn10 O36 Mn8 -70.7(5) . . . . ? 
O7 Mn4 O37 Mn2 -126(2) . . . . ? 
O23 Mn4 O37 Mn2 -44.4(5) . . . . ? 
O9 Mn4 O37 Mn2 141.5(5) . . . . ? 
O16 Mn4 O37 Mn2 49.7(5) . . . . ? 
O34 Mn4 O37 Mn2 -136.8(4) . . . . ? 
Mn11 Mn4 O37 Mn2 -133.7(3) . . . . ? 
Mn5 Mn4 O37 Mn2 178.5(4) . . . . ? 
O7 Mn4 O37 Mn10 84(2) . . . . ? 
O23 Mn4 O37 Mn10 165.5(4) . . . . ? 
O9 Mn4 O37 Mn10 -8.6(4) . . . . ? 
O16 Mn4 O37 Mn10 -100.4(4) . . . . ? 
O34 Mn4 O37 Mn10 73.1(4) . . . . ? 
Mn11 Mn4 O37 Mn10 76.2(4) . . . . ? 
Mn5 Mn4 O37 Mn10 28.4(4) . . . . ? 
Mn2 Mn4 O37 Mn10 -150.1(7) . . . . ? 
O14 Mn2 O37 Mn4 -134.2(5) . . . . ? 
O13 Mn2 O37 Mn4 162(5) . . . . ? 
O24 Mn2 O37 Mn4 59.9(5) . . . . ? 
O15 Mn2 O37 Mn4 -38.4(5) . . . . ? 
O35 Mn2 O37 Mn4 145.4(4) . . . . ? 
Mn6 Mn2 O37 Mn4 142.3(3) . . . . ? 
Mn1 Mn2 O37 Mn4 -175.7(4) . . . . ? 
O14 Mn2 O37 Mn10 16.8(4) . . . . ? 
O13 Mn2 O37 Mn10 -47(5) . . . . ? 
O24 Mn2 O37 Mn10 -149.1(4) . . . . ? 
O15 Mn2 O37 Mn10 112.6(4) . . . . ? 
O35 Mn2 O37 Mn10 -63.6(4) . . . . ? 
Mn6 Mn2 O37 Mn10 -66.7(5) . . . . ? 
Mn1 Mn2 O37 Mn10 -24.7(3) . . . . ? 
Mn4 Mn2 O37 Mn10 151.0(7) . . . . ? 
O36 Mn10 O37 Mn4 -158.7(4) . . . . ? 
O38 Mn10 O37 Mn4 -49.9(4) . . . . ? 
N1 Mn10 O37 Mn4 71.3(5) . . . . ? 
O36 Mn10 O37 Mn2 48.7(4) . . . . ? 
O38 Mn10 O37 Mn2 157.5(4) . . . . ? 
N1 Mn10 O37 Mn2 -81.3(5) . . . . ? 
O3 Mn3 O38 Mn5 -166(3) . . . . ? 
O21 Mn3 O38 Mn5 -53.0(5) . . . . ? 
O2 Mn3 O38 Mn5 141.0(5) . . . . ? 
O18 Mn3 O38 Mn5 40.3(5) . . . . ? 
O33 Mn3 O38 Mn5 -140.7(4) . . . . ? 
Mn7 Mn3 O38 Mn5 -138.9(3) . . . . ? 
Mn8 Mn3 O38 Mn5 176.4(4) . . . . ? 
O3 Mn3 O38 Mn10 46(4) . . . . ? 
O21 Mn3 O38 Mn10 159.1(4) . . . . ? 
O2 Mn3 O38 Mn10 -6.9(4) . . . . ? 
O18 Mn3 O38 Mn10 -107.7(4) . . . . ? 
O33 Mn3 O38 Mn10 71.3(4) . . . . ? 
Mn7 Mn3 O38 Mn10 73.2(5) . . . . ? 
Mn5 Mn3 O38 Mn10 -147.9(7) . . . . ? 
Mn8 Mn3 O38 Mn10 28.5(3) . . . . ? 
O8 Mn5 O38 Mn3 132.1(17) . . . . ? 
O9 Mn5 O38 Mn3 -139.9(4) . . . . ? 
O22 Mn5 O38 Mn3 46.4(5) . . . . ? 
O17 Mn5 O38 Mn3 -45.6(5) . . . . ? 
O34 Mn5 O38 Mn3 139.2(4) . . . . ? 
Mn11 Mn5 O38 Mn3 133.4(3) . . . . ? 
Mn4 Mn5 O38 Mn3 -178.5(4) . . . . ? 
O8 Mn5 O38 Mn10 -81.0(19) . . . . ? 
O9 Mn5 O38 Mn10 6.9(4) . . . . ? 
O22 Mn5 O38 Mn10 -166.7(4) . . . . ? 
O17 Mn5 O38 Mn10 101.2(4) . . . . ? 
O34 Mn5 O38 Mn10 -74.0(4) . . . . ? 
Mn11 Mn5 O38 Mn10 -79.7(4) . . . . ? 
Mn4 Mn5 O38 Mn10 -31.7(3) . . . . ? 
Mn3 Mn5 O38 Mn10 146.8(7) . . . . ? 
O36 Mn10 O38 Mn3 -51.4(4) . . . . ? 
O37 Mn10 O38 Mn3 -158.1(4) . . . . ? 
N1 Mn10 O38 Mn3 72.9(5) . . . . ? 
O36 Mn10 O38 Mn5 159.0(3) . . . . ? 
O37 Mn10 O38 Mn5 52.2(4) . . . . ? 
N1 Mn10 O38 Mn5 -76.8(5) . . . . ? 
  
loop_ 
 _geom_hbond_atom_site_label_D 
 _geom_hbond_atom_site_label_H 
 _geom_hbond_atom_site_label_A 
 _geom_hbond_distance_DH 
 _geom_hbond_distance_HA 
 _geom_hbond_distance_DA 
 _geom_hbond_angle_DHA 
 _geom_hbond_site_symmetry_A 
O39 H39 O5  0.84 2.16 2.860(13) 141.0 . 
O39 H39 O22  0.84 2.52 3.216(13) 140.3 . 
O39 H39 O8  0.84 2.65 3.076(13) 113.4 . 
  
_diffrn_measured_fraction_theta_max    0.936 
_diffrn_reflns_theta_full              28.78 
_diffrn_measured_fraction_theta_full   0.936 
_refine_diff_density_max    2.361 
_refine_diff_density_min   -0.686 
_refine_diff_density_rms    0.212 
  
